# Supplementary material for: Prognostic value of ki67 in BCG-treated non-muscle invasive bladder cancer: a meta-analysis and systematic review
Source: PubMed Central journal article supplement (PMC5905754; doi:10.1136/bmjopen-2017-019635), 2018-04-17
Supplement: bmjopen-2017-019635.draft_revisions.pdf [file bmjopen-2017-019635.draft_revisions.pdf]

# BMJ Open

BMJ Open is committed to open peer review. As part of this commitment we make the peer review history of every article we publish publicly available.

When an article is published we post the peer reviewers' comments and the authors' responses online. We also post the versions of the paper that were used during peer review. These are the versions that the peer review comments apply to.

The versions of the paper that follow are the versions that were submitted during the peer review process. They are not the versions of record or the final published versions. They should not be cited or distributed as the published version of this manuscript.

BMJ Open is an open access journal and the full, final, typeset and author-corrected version of record of the manuscript is available on our site with no access controls, subscription charges or pay-per-view fees (<http://bmjopen.bmj.com>).

If you have any questions on BMJ Open's open peer review process please email [editorial.bmjopen@bmj.com](mailto:editorial.bmjopen@bmj.com)

# BMJ Open

## Prognostic Value of ki67 in Bacillus Calmette–Guérin-Treated Non-muscle-Invasive Bladder Cancer: a Meta-analysis and Systematic Review

|                                 |                                                                                                                                                                                                                                                                                                                                                                                                                                                                                                                                                                                                                                                                                                                                 |
|---------------------------------|---------------------------------------------------------------------------------------------------------------------------------------------------------------------------------------------------------------------------------------------------------------------------------------------------------------------------------------------------------------------------------------------------------------------------------------------------------------------------------------------------------------------------------------------------------------------------------------------------------------------------------------------------------------------------------------------------------------------------------|
| Journal:                        | <i>BMJ Open</i>                                                                                                                                                                                                                                                                                                                                                                                                                                                                                                                                                                                                                                                                                                                 |
| Manuscript ID                   | bmjopen-2017-019635                                                                                                                                                                                                                                                                                                                                                                                                                                                                                                                                                                                                                                                                                                             |
| Article Type:                   | Research                                                                                                                                                                                                                                                                                                                                                                                                                                                                                                                                                                                                                                                                                                                        |
| Date Submitted by the Author:   | 20-Sep-2017                                                                                                                                                                                                                                                                                                                                                                                                                                                                                                                                                                                                                                                                                                                     |
| Complete List of Authors:       | He, Yuhui; Peking University China-Japan Friendship School of Clinical Medicine; China-Japan Friendship Hospital, Department of Urology<br>Wang, Ning; North China University of Science and Technology<br>Zhou, Xiaofeng; Peking University China-Japan Friendship School of Clinical Medicine; China-Japan Friendship Hospital, Department of Urology<br>Wang, Jianfeng; China-Japan Friendship Hospital, Department of Urology<br>Ding, Zhenshan; China-Japan Friendship Hospital, Department of Urology<br>Chen, Xing ; China-Japan Friendship Hospital, Department of Urology<br>Deng, Yisen; Peking University China-Japan Friendship School of Clinical Medicine; China-Japan Friendship Hospital, Department of Urology |
| <b>Primary Subject Heading</b>: | Urology                                                                                                                                                                                                                                                                                                                                                                                                                                                                                                                                                                                                                                                                                                                         |
| Secondary Subject Heading:      | Urology, Addiction                                                                                                                                                                                                                                                                                                                                                                                                                                                                                                                                                                                                                                                                                                              |
| Keywords:                       | Ki67, meta-analysis, non-muscular-invasive bladder cancer;, prognosis                                                                                                                                                                                                                                                                                                                                                                                                                                                                                                                                                                                                                                                           |
|                                 |                                                                                                                                                                                                                                                                                                                                                                                                                                                                                                                                                                                                                                                                                                                                 |

SCHOLARONE™  
Manuscripts

1  
2  
3 **Prognostic Value of ki67 in Bacillus Calmette–Guérin-Treated**  
4  
5  
6 **Non-muscle-Invasive Bladder Cancer: a Meta-analysis and**  
7  
8 **Systematic Review**  
9

10  
11 Yuhui He<sup>1,2</sup>, Ning Wang<sup>3</sup>, Xiaofeng Zhou<sup>1,2\*</sup>, Jianfeng Wang<sup>2</sup>, Zhenshan Ding<sup>2</sup>, Xing  
12  
13 Chen<sup>2</sup>, Yisen Deng<sup>1,2</sup>  
14

15  
16  
17 <sup>1</sup> Peking University China-Japan Friendship School of Clinical Medicine, Beijing  
18  
19 100029, China  
20

21 <sup>2</sup> Department of Urology, China-Japan Friendship Hospital, Beijing 100029, China  
22

23 <sup>3</sup> North China University of Science and Technology, Tangshan 063013, China  
24  
25

26  
27  
28 **\*Corresponding Author**  
29

30 Xiaofeng Zhou  
31

32 Peking University China-Japan Friendship School of Clinical Medicine, Beijing  
33  
34 100029, China  
35

36 Department of Urology, China-Japan Friendship Hospital, Beijing 100029, China  
37

38  
39 **Tel:** +86 1590110219  
40

41 **Email :** [doctorzxf@126.com](mailto:doctorzxf@126.com)  
42  
43

44 **Fax:** +86 10 6421 7749  
45  
46

47  
48  
49 **Word count**  
50

51 Title page: 105  
52

53 Abstract: 256  
54

55 References: 1211  
56  
57

Figures and tables: 7, 4

For peer review only



## Abstract

**Objectives:** The aim of this study was to explore the prognostic value of ki67 as a marker in Bacillus Calmette–Guérin (BCG)-treated non-muscle-invasive bladder cancer (NMIBC).

**Methods:** Studies were systematically retrieved from the relevant databases (Web of Science, PubMed, Cochrane Library, and Embase), and the expiry date was May 2017. The research steps referred to the Preferred Reporting Items for Systematic Reviews and Meta-Analysis Statement.

**Results:** A total of 11 studies, including 1321 cases, complying with the inclusion criteria were enrolled. The results of the meta-analysis indicated that the expression of ki67 was not statistically significantly correlated with recurrence-free survival (RFS). No significant heterogeneity was found among all included studies. The expression of ki67 was statistically significantly correlated with progression-free survival (PFS), and the overexpression of ki67 was the risk factor for PFS. Statistical heterogeneity was noted among all the included studies. The studies that might cause heterogeneity were excluded using the Galbraith plot, and then the meta-analysis was performed again. The results showed that the expression of ki67 was still correlated with PFS. In the Caucasian subgroup, the overexpression of ki67 was the risk factor for RFS and PFS.

**Conclusions:** For the patients with NMIBC treated with BCG intravesical immunotherapy, the overexpression of ki67 was the risk factor for PFS, and the relationship between the expression of ki67 and RFS had no statistical significance. In Caucasians, the overexpression of ki67 was the risk factor for RFS and PFS. However, these findings still need well-designed, prospective, randomized controlled trials with a large sample size for validation.

1  
2  
3  
4  
5 **Key words:** Ki67; meta-analysis; non-muscular-invasive bladder cancer; prognosis  
6  
7  
8  
9  
10  
11  
12  
13  
14  
15  
16  
17  
18  
19  
20  
21  
22  
23  
24  
25  
26  
27  
28  
29  
30  
31  
32  
33  
34  
35  
36  
37  
38  
39  
40  
41  
42  
43  
44  
45  
46  
47  
48  
49  
50  
51  
52  
53  
54  
55  
56  
57  
58  
59  
60

For peer review only

### **Strengths and limitations of this study**

This meta-analysis and systematic review was performed by a strictly literature search and was the first meta-analysis to evaluate the prognostic value of ki67 on patients with NMIBC after transurethral resection and BCG intravesical immunotherapy.

The review found the Prognostic Value of ki67 in BCG-Treated NMIBC, which can guide the follow-up immunohistochemical markers research.

The review only included English published studies and did not consider the surgical skills from published studies.

## ***Introduction***

Bladder cancer is one of the most common clinical urological tumor and is a direct threat to the survival of patients with the disease. The incidence of bladder cancer varies across the world with the highest rate in the developed communities.<sup>1</sup> A total of 429,800 new cases of bladder cancer and 165,100 deaths occurred in 2012 worldwide. The majority of bladder cancer occurs in men, and about a tenfold variation has been reported in incidence rates internationally.<sup>2</sup> About 70% of these patients are non-muscle-invasive bladder cancer (NMIBC).<sup>3</sup> Four major organizational guidelines on NMIBC, including the American Urological Association/Society of Urologic Oncology, European Association of Urology, National Comprehensive Cancer Network, and National Institute for Health and Care Excellence guidelines, recommend that the proper initial transurethral resection (TUR) of bladder tumor is a critical step in the initial management and staging of the disease.<sup>4</sup> However, TUR surgery alone cannot solve the postoperative problems for NMIBC because of high recurrence rate and disease development.<sup>5</sup> Postoperative TUR associated with Bacillus Calmette–Guérin (BCG) intravesical immunotherapy can prevent the postoperative recurrence of NMIBC and significantly reduce the moderate and high development risk of NMIBC.<sup>6, 7</sup> However, the postoperative BCG intravesical immunotherapy still has some problems. The failure rate of BCG intravesical therapy in NMIBC is about 40%–50%.<sup>8</sup> Furthermore, BCG also has toxic side effects, such as hepatitis, pneumonitis, epididymitis/orchitis, abscess formation, bladder contracture, ureteral obstruction, BCG sepsis, leukopenia, and hematuria.<sup>9</sup> Therefore, BCG therapy should be individually performed, and the patients having no effectiveness on BCG therapy should be timely recognized. These patients or those with poor prognosis should receive radical cystectomy or other therapy in time to avoid futile

1  
2  
3 treatment and alleviate pain. However, the recognition of patients with no effect of  
4  
5 TUR postoperative BCG intravesical immunotherapy is still hard due to the  
6  
7 heterogeneity of bladder cancer and individuality of patients.<sup>10</sup> Therefore, finding the  
8  
9 prognostic factors for patients with NMIBC receiving TUR and BCG therapy is  
10  
11 extremely necessary.

12  
13 The recurrence rate of bladder cancer treated with different therapies is between 50%  
14  
15 and 80%, and about 15% of the low-grade tumor recurrence involves high-grade  
16  
17 tumors.<sup>11</sup> The patients need periodical cystoscopy to find the recurrent focus in time.  
18  
19 A reliable prognostic molecular marker can reduce the pain caused by cystoscopy.  
20  
21 Because NMIBC does not have reliable prognostic markers, it is hard to decide  
22  
23 postoperative therapy in the clinic,<sup>12</sup> which depends mainly on the clinical guidelines  
24  
25 and physician's experience. Currently, some of the published studies about  
26  
27 immunohistochemical markers have evaluated the prognostic value of BCG  
28  
29 intravesical immunotherapy on the patients first receiving TUR. The main  
30  
31 immunohistochemical markers include ki67, p53, p27, pRb, CD9, CD20, E2F1, and  
32  
33 so forth.<sup>13, 14</sup> However, no immunohistochemical marker has been confirmed so far.  
34  
35  
36 The prognostic value of ki67 antigen on the survival in patients with NMIBC  
37  
38 receiving BCG intravesical immunotherapy has been controversial. For example,  
39  
40 Kruger.<sup>15</sup> reported that ki67 antigen was an independent predictive factor of  
41  
42 recurrence in pT1 stage tumor, but Oderde<sup>16</sup> believed that ki67 was an independent  
43  
44 predictive factor for all the NMIBC recurrence. Zlotta<sup>17</sup> reported that ki67 antigen had  
45  
46 no independent prognostic value in patients receiving BCG therapy. Saint<sup>18</sup>  
47  
48 retrospected the recent 25-year published studies and believed that the independent  
49  
50 prognostic factor for bladder cancer on BCG response was not unclear. An  
51  
52 international consensus group listed various bladder cancer prognostic indexes by  
53  
54  
55  
56

1  
2  
3 reviewing PubMed and considered that although some markers (such as ki67 and p53)  
4  
5 were possible to predict the recurrence and development of bladder cancer, the data  
6  
7 still had heterogeneity. Thus, strict test criteria and clear statistical methods should be  
8  
9 established for further evaluation.<sup>19</sup>

10  
11 A meta-analysis can enlarge the sample size by integrating independent studies with  
12  
13 small sample size, further increase the statistical efficacy, and reduce the wrong  
14  
15 conclusion caused by the small sample size.<sup>20</sup> The aim of this study was to explore the  
16  
17 prognostic value of ki67 as a marker in BCG-treated NMIBC. Based on the literature  
18  
19 search, this study was the first meta-analysis to evaluate the prognostic value of ki67  
20  
21 on patients with NMIBC after BCG therapy.  
22  
23  
24  
25

## 26 ***Methods***

27  
28 This meta-analysis was performed according to the Preferred Reporting Items for  
29  
30 Systematic Reviews and Meta-Analyses (PRISMA) Statement (**Table S1**).<sup>21</sup> Because  
31  
32 all the enrolled published studies were approved by the ethics committee in the  
33  
34 research institute, the present meta-analysis did not need the approval.  
35  
36

## 37 ***Literature retrieval strategy***

38  
39 Published studies were retrieved from Web of Science, PubMed, Cochrane Library,  
40  
41 and Embase databases. Free word retrieval strategy was used. The search terms were  
42  
43 “bladder cancer or bladder carcinoma or bladder neoplasm or bladder tumor,”  
44  
45 “Bacillus Calmette–Guérin or BCG,” and “ki67 antigen or ki-67 or ki67 or MBI-1.”  
46  
47 The retrieval time was until May 24, 2017, assisted with manual retrieval. The  
48  
49 enrolled contents included the reference and relevant suggestive references while  
50  
51 searching.  
52  
53

## 54 ***Inclusion and exclusion criteria***

1  
2  
3 Inclusion criteria were as follows: (1) prospective studies or retrospective research  
4 published studies evaluating the prognostic relationship between the expression of  
5 ki67 and NMIBC treated with BCG; (2) the expression of ki67 in tissues detected by  
6 immunohistochemistry; (3) hazard ratio (HR) and 95% confidence interval (95% CI)  
7 directly obtained from the published studies; and (4) published English studies.

8  
9  
10  
11  
12  
13 Exclusion criteria were as follows: (1) review, systematic evaluation, case report,  
14 editorial, and specialist experience; (2) no human subjects; and (3) published studies  
15 in which data could not be extracted or those having wrong data.  
16  
17  
18

### 19 20 ***Data extraction and evaluation of literature quality***

21  
22 Based on the aforementioned criteria, two reviewers independently screened the  
23 published studies by reading titles and abstracts and got preliminary conclusions. If  
24 the conclusions were not consistent, the literature was discussed by all the authors to  
25 decide its enrollment. The relevant information of the enrolled published studies was  
26 extracted, such as first author, publication time, research country, sex, case number,  
27 age, follow-up date, disease stage, cutoff values, RFS, and PFS. The Newcastle–  
28 Ottawa Scale (NOS) was used to evaluate the quality of all the published studies,<sup>22</sup>  
29 scores 0–3, 4–5, and 6–8 were accepted as low, medium, and high quality.  
30  
31  
32  
33  
34  
35  
36  
37  
38

### 39 40 ***Statistical methods***

41  
42 The study effects of recurrence-free survival (RFS) and progression-free survival  
43 (PFS) were reflected by 95% CI and HR. The influence of the expression of ki67 on  
44 prognosis was expressed as 95% CI and HR. The values of HR and 95% CI were  
45 directly obtained from the original published studies. Besides, the Parmar and  
46 Tierney's<sup>23</sup> method was used to extract the data because some of the published studies  
47 did not directly provide HR and 95% CI. For example, some studies provided only the  
48 survival curve. In this meta-analysis, the DerSimonian–Laird random-effects model<sup>24</sup>  
49  
50  
51  
52  
53  
54  
55  
56

1  
2  
3 was used because when the heterogeneity was large, only the random-effects model  
4  
5 could be suitable used. Similar to traditional methods,  $HR > 1$  was considered as the  
6  
7 prognostic risk factor for the overexpression of ki67, and  $HR < 1$  was a protective  
8  
9 factor.  $95\% CI < 1$  indicated a statistical difference in the relationship between the  
10  
11 overexpression of ki67 and prognosis.  
12  
13

14  
15 The heterogeneity was calculated according to chi-square-based Q test and  $I^2$   
16  
17 statistic.<sup>25</sup> The heterogeneity was judged by the  $I^2$  value (low heterogeneity:  $I^2 <$   
18  
19  $25\%$ ; moderate heterogeneity:  $I^2 = 25\%–50\%$ ; large heterogeneity:  $I^2 > 50\%$ ).  
20  
21

22  
23 Besides, a  $P$  value  $>0.05$  was also considered as low heterogeneity. Then, the  
24  
25 subgroup analysis based on regions, sample size, follow-up period, tumor grading,  
26  
27 cutoff value, publication time, and patient age was performed. A Galbraith plot was  
28  
29 used to search published studies with heterogeneity,<sup>26</sup> and after excluding these  
30  
31 published studies, the meta-analysis was performed again. Meanwhile, the factors  
32  
33 causing heterogeneity were also explored by the residual maximum likelihood  
34  
35 (REML)-based random-effects meta-regression analysis.<sup>27</sup> All the statistical analyses  
36  
37 were performed using the Stata12.0 software (StataCorp, TX, USA), and the  
38  
39 two-sided test was used to evaluate the  $P$  value.  
40  
41  
42  
43

#### 44 45 ***Evaluation of publication bias***

46  
47 Begg's plot and Egger's test method were used to find the possible publication bias. A  
48  
49  $P$  value  $<0.05$  was believed to have publication bias.  
50  
51

#### 52 53 ***Results***



### Literature screening

A total of 97 published studies were retrieved. Furthermore, 68 of them were excluded after duplicates removed and records screened, and 18 were excluded after reading the full text (10 published studies from which HR and 95% CI could not be obtained, 2 non-English studies, and 6 that did not use ki67 detection). Finally, 11 published studies were enrolled in the meta-analysis (**Figure 1**).

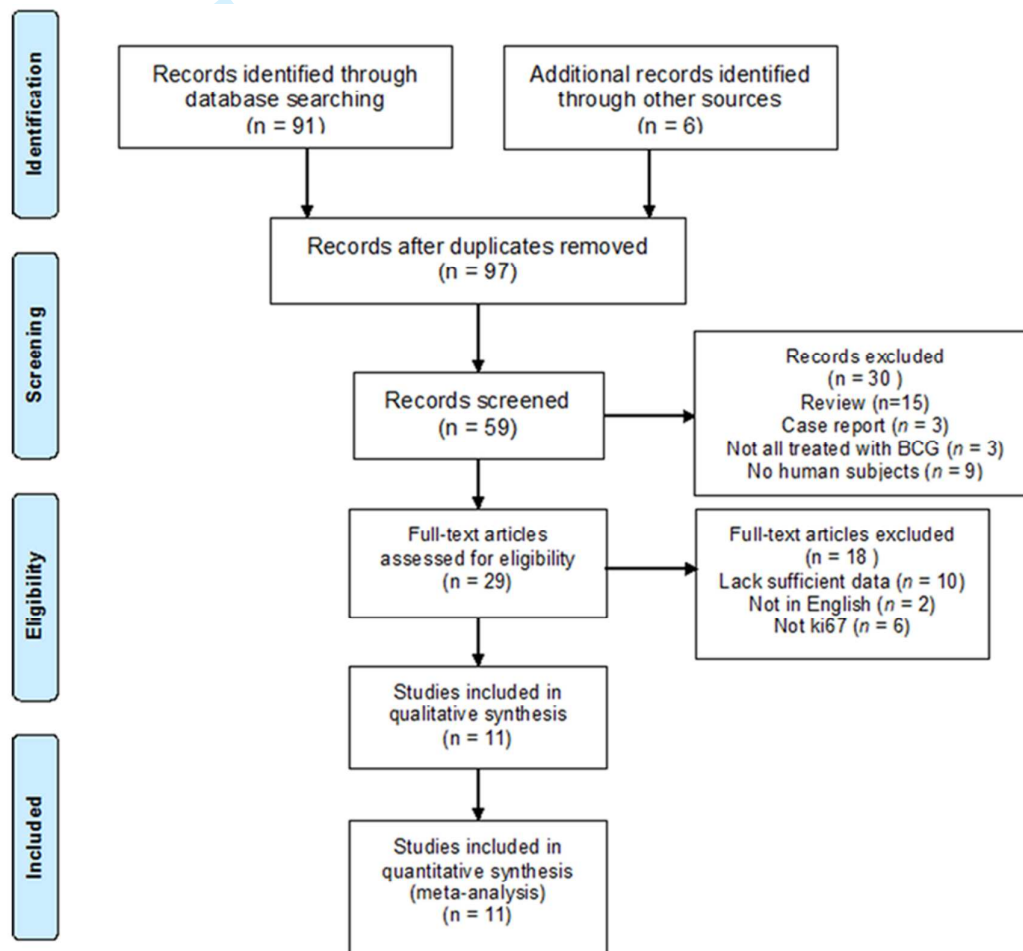

**Figure 1.** Flow diagram of study selection.

### Basic characteristics and quality evaluation of enrolled published studies

The enrolled 11 published studies were published between 1997 and 2013, and the

1  
2  
3 countries included Italy, South Korea, Spain, Germany, New Zealand, Canada,  
4  
5 Portugal, and France. The largest sample size was 309, and the smallest one was 32. A  
6  
7 total of 1321 patients were enrolled in this study. The follow-up period was beyond 36  
8  
9 months, and the longest was 229 months. T1 was the main tumor grading, and the  
10  
11 cutoff value ranged from 10.4% to 40%. Seven published studies reported patients'  
12  
13 RFS, and nine reported PFS (**Table 1**). One literature was scored as 6 star by NOS,  
14  
15 seven as 7 star, and three as 8 star, and the median of the NOS score was 7 (**Table 2**).  
16  
17  
18  
19  
20  
21  
22  
23  
24  
25  
26  
27  
28  
29  
30  
31  
32  
33  
34  
35  
36  
37  
38  
39  
40  
41  
42  
43  
44  
45  
46  
47  
48  
49  
50  
51  
52  
53  
54  
55  
56  
57  
58  
59  
60

**Table 1.** Main characteristics of all studies included in this meta-analysis

| Study                         | Year | Country             | Male/Female | No. of patients | Age (year)     | Follow-up (month) | Stage     | Cutoff | Survival analysis |
|-------------------------------|------|---------------------|-------------|-----------------|----------------|-------------------|-----------|--------|-------------------|
| Oderda <sup>16</sup>          | 2013 | Italy               | 166/26      | 192             | 73.2 (SD 11.9) | 100 (2–229)       | All NMIBC | 20%    | RFS               |
| Park <sup>14</sup>            | 2013 | Korea               | 53/8        | 61              | 66 (31–85)     | 60 (6–217)        | T1G3      | 10.4%  | RFS/PFS           |
| Quintero <sup>28</sup>        | 2013 | Spain               | 143/21      | 164             | 61 (29–93)     | 75 (60–144)       | Ta        | 13%    | PFS               |
| Bertz <sup>12</sup>           | 2012 | Germany             | 237/72      | 309             | 71.7 (38–87)   | 49 (5–172)        | pT1       | 15%    | RFS/PFS           |
| van Rhijn <sup>29</sup>       | 2012 | Netherlands, Canada | 105/24      | 129             | 68.8 (SD 9.9)  | 78 (39.6–110.4)   | T1        | 25%    | RFS/PFS           |
| Burger <sup>30</sup>          | 2007 | Germany             | 45/21       | 71              | 71 (52–94)     | 39 (1–133)        | T1/Ta     | 15%    | RFS               |
| Queipo-zaragoza <sup>31</sup> | 2007 | Spain               | 71/12       | 83              | 68.1 (SD 8.5)  | All >36           | T1G3      | 40%    | PFS               |
| Lopez-Beltran <sup>32</sup>   | 2004 | Spain               | 49/2        | 51              | 69.96 (49–89)  | 63.82 (60–144)    | T1G3      | 13%    | PFS               |
| Santos <sup>33</sup>          | 2003 | Portugal            | 115/44      | 159             | 66 (21–88)     | 46.5 (4–123)      | pTa/pT1   | 18%    | RFS/PFS           |
| Blanchet <sup>34</sup>        | 2001 | France              | -           | 70              | 62.6 (21–84)   | 64 (12–111)       | pT1/pTa   | 13%    | PFS               |
| Lee <sup>35</sup>             | 1997 | Korea               | 28/4        | 32              | 57.1 (30–81)   | All >24           | T1G2-3    | 20%    | RFS               |

No., number; NMIBC, non-muscle-invasive bladder cancer; RFS, recurrence-free survival; PFS, progression-free survival

**Table 2.** Quality of the included studies assessed by NOS

| Study                         | Selection                    |                             |                       | Comparability          |                              | Exposure                  |                                                 |                   | Scores |
|-------------------------------|------------------------------|-----------------------------|-----------------------|------------------------|------------------------------|---------------------------|-------------------------------------------------|-------------------|--------|
|                               | Adequate definition of cases | Representativeness of cases | Selection of controls | Definition of controls | Control for important factor | Ascertainment of exposure | Same method to ascertain for cases and controls | Non-response rate |        |
| Oderda <sup>16</sup>          | —                            | ☆                           | ☆                     | ☆                      | ☆☆                           | ☆                         | ☆                                               | ☆                 | 8      |
| Park <sup>14</sup>            | —                            | ☆                           | ☆                     | —                      | ☆☆                           | ☆                         | ☆                                               | ☆                 | 7      |
| Quintero <sup>28</sup>        | —                            | ☆                           | ☆                     | —                      | ☆☆                           | ☆                         | ☆                                               | —                 | 6      |
| Bertz <sup>12</sup>           | —                            | ☆                           | ☆                     | —                      | ☆☆                           | ☆                         | ☆                                               | ☆                 | 7      |
| van Rhijn <sup>29</sup>       | —                            | ☆                           | ☆                     | —                      | ☆☆                           | ☆                         | ☆                                               | ☆                 | 7      |
| Burger <sup>30</sup>          | ☆                            | ☆                           | ☆                     | —                      | ☆☆                           | ☆                         | ☆                                               | —                 | 7      |
| Queipo-zaragoza <sup>31</sup> | —                            | ☆                           | ☆                     | —                      | ☆☆                           | ☆                         | ☆                                               | ☆                 | 7      |
| Lopez-Beltran <sup>32</sup>   | —                            | ☆                           | ☆                     | ☆                      | ☆☆                           | ☆                         | ☆                                               | ☆                 | 8      |
| Santos <sup>33</sup>          | —                            | ☆                           | ☆                     | —                      | ☆☆                           | ☆                         | ☆                                               | ☆                 | 7      |
| Blanchet <sup>34</sup>        | —                            | ☆                           | ☆                     | ☆                      | ☆☆                           | ☆                         | ☆                                               | ☆                 | 8      |
| Lee <sup>35</sup>             | —                            | ☆                           | ☆                     | —                      | ☆☆                           | ☆                         | ☆                                               | ☆                 | 7      |

### ***Influence of the expression of ki67 on RFS***

Seven published studies reported ki67 expression and PFS results of patients with NMIBC receiving BCG. The meta-analysis indicated that ki67 had no statistical significance with RFS (HR = 1.331, 95% CI: 0.980–1.809), and no heterogeneity among the enrolled studies was reported ( $I^2 = 36.7%$ ,  $P = 0.148$ ) (**Figure 2A**). The subgroup analysis was performed based on the regions, sample size, follow-up period, stage, cutoff value, publication time, and age. The results indicated that in the Caucasian subgroup, the overexpression of ki67 was the risk factor for RFS (HR = 1.441, 95% CI: 1.014–2.047). In the subgroup with a follow-up period shorter than 6 months, the overexpression of ki67 was the risk factor for RFS (HR = 1.853, 95% CI: 1.316–2.607) (**Table 3**).

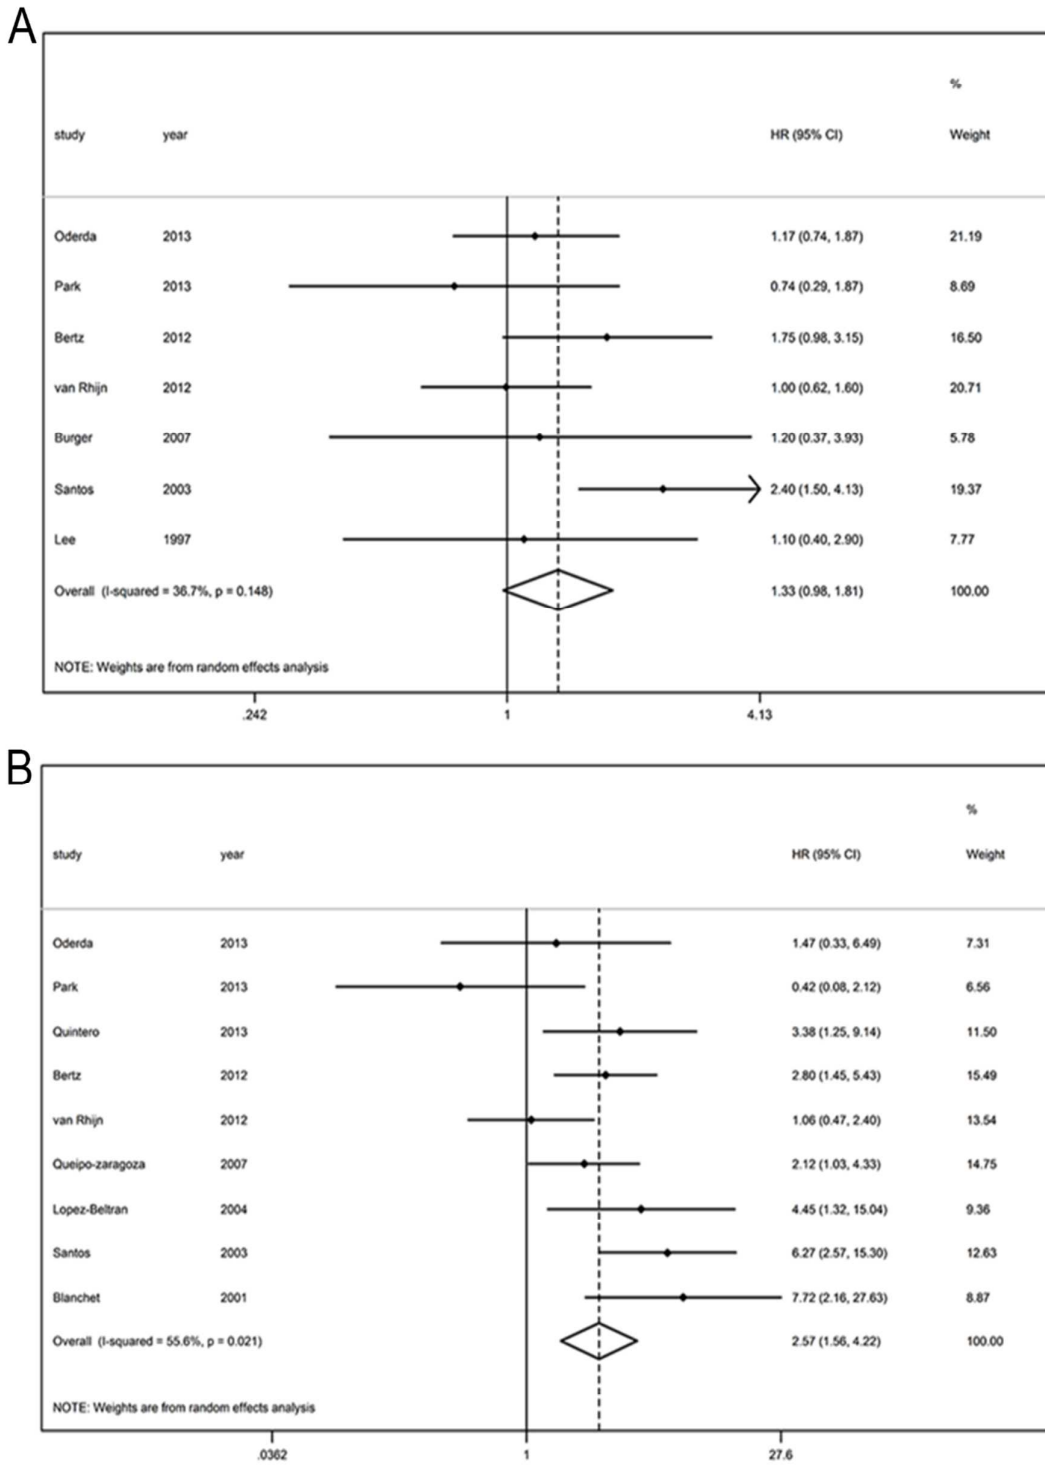

**Figure 2.** Forest plots of HRs estimated for the relationship between the expression of ki67 and RFS (A) or PFS (B) among patients with NMIBC treated with BCG.

**Table 3.** Subgroup results of RFS and heterogeneity test

| Variables          | Study number | HR (95% CI)         | Heterogeneity test |          |                           |
|--------------------|--------------|---------------------|--------------------|----------|---------------------------|
|                    |              |                     | <i>Q</i>           | <i>P</i> | <i>I</i> <sup>2</sup> (%) |
| Total RFS          | 7            | 1.331 (0.980–1.809) | 9.48               | 0.148    | 36.7                      |
| Region             |              |                     |                    |          |                           |
| Asian              | 2            | 0.892 (0.454–1.752) | 0.32               | 0.570    | 0.0                       |
| Caucasian          | 5            | 1.441 (1.014–2.047) | 7.52               | 0.111    | 46.8                      |
| Sample size        |              |                     |                    |          |                           |
| >100               | 4            | 1.466 (0.986–2.181) | 7.44               | 0.059    | 59.7                      |
| ≤100               | 3            | 0.959 (0.534–1.725) | 0.51               | 0.777    | 0.0                       |
| Follow-up (month)  |              |                     |                    |          |                           |
| ≥60                | 3            | 1.036 (0.758–1.415) | 0.79               | 0.674    | 0.0                       |
| <60                | 4            | 1.853 (1.316–2.607) | 2.62               | 0.453    | 0.0                       |
| Stage              |              |                     |                    |          |                           |
| All NMIBC          | 3            | 1.575 (0.915–2.711) | 4.44               | 0.109    | 54.9                      |
| Others             | 4            | 1.153 (0.821–1.620) | 3.21               | 0.360    | 6.6                       |
| Cut off            |              |                     |                    |          |                           |
| 15%                | 2            | 1.625 (0.963–2.743) | 0.31               | 0.575    | 0.0                       |
| Others             | 5            | 1.252 (0.839–1.869) | 8.56               | 0.073    | 53.3                      |
| Patient age (year) |              |                     |                    |          |                           |
| ≥70                | 3            | 1.352 (0.955–1.913) | 1.16               | 0.559    | 0.0                       |
| <70                | 4            | 1.256 (0.717–2.198) | 8.32               | 0.040    | 63.9                      |

NMIBC, non-muscle-invasive bladder cancer; RFS, recurrence-free survival.

### *Influence of the expression of ki67 on PFS*

A total of nine published studies reported ki67 expression and PFS results of patients with NMIBC receiving BCG. The meta-analysis indicated that ki67 had no statistical significance with RFS (HR = 2.567, 95% CI: 1.562–4.219), and the overexpression of ki67 was the risk factor for PFS. Statistical heterogeneity was found among all the included studies ( $I^2 = 55.6\%$ ,  $P = 0.021$ ) (**Figure 2B**). The subgroup analysis was performed based on the regions, sample size, follow-up period, stage, cutoff value, publication time, and age. The results indicated that the overexpression of ki67 was the risk factor for PFS in the Caucasian subgroup (HR = 2.883, 95% CI: 1.830–4.544), the subgroup with sample size > 100 (HR = 2.559, 95% CI: 1.372–4.774), the subgroup with the follow-up period < 6 months (HR = 3.158, 95% CI: 1.774–5.623), the subgroup with other cutoffs (HR = 2.515, 95% CI: 1.382–4.576), and the two subgroups based on age (HR = 2.800, 95% CI: 1.447–5.418 and HR = 2.654, 95% CI: 1.381–5.100, respectively) (**Table 4**).



**Table 4.** Subgroup results of PFS and heterogeneity test

| Variables          | Study number | HR (95% CI)          | Heterogeneity test |          |                           |
|--------------------|--------------|----------------------|--------------------|----------|---------------------------|
|                    |              |                      | <i>Q</i>           | <i>P</i> | <i>I</i> <sup>2</sup> (%) |
| Total PFS          | 9            | 2.567 (1.562–4.219)  | 18.1               | 0.021    | 55.6                      |
| Region             |              |                      |                    |          |                           |
| Asian              | 1            | 0.421 (0.084–2.114)  | 0.00               |          |                           |
| Caucasian          | 8            | 2.883 (1.830–4.544)  | 12.99              | 0.072    | 46.1                      |
| Sample size        |              |                      |                    |          |                           |
| >100               | 5            | 2.559 (1.372–4.774)  | 9.26               | 0.055    | 56.8                      |
| ≤100               | 4            | 2.536 (0.943–6.818)  | 8.75               | 0.033    | 65.7                      |
| Follow-up (month)  |              |                      |                    |          |                           |
| ≥60                | 6            | 2.153 (0.984–4.710)  | 13.08              | 0.023    | 61.8                      |
| <60                | 3            | 3.158 (1.774–5.623)  | 3.56               | 0.169    | 43.8                      |
| Stage              |              |                      |                    |          |                           |
| All NMIBC          | 3            | 4.673 (1.938–11.264) | 3.29               | 0.193    | 39.2                      |
| Others             | 6            | 2.044 (1.213–15.040) | 9.58               | 0.088    | 47.8                      |
| Cut off            |              |                      |                    |          |                           |
| 15%                | 1            | 2.800 (1.447–5.418)  | 0.00               |          |                           |
| Others             | 8            | 2.515 (1.382–4.576)  | 17.92              | 0.012    | 60.9                      |
| Patient age (year) |              |                      |                    |          |                           |
| ≥70                | 2            | 2.519 (1.377–4.606)  | 0.60               | 0.438    | 0.0                       |
| <70                | 7            | 2.654 (1.381–5.100)  | 17.40              | 0.008    | 65.5                      |

NMIBC, non-muscle-invasive bladder cancer; PFS, progression-free survival.

### ***Galbraith plot***

Using Galbraith plot (**Figure 3A**), it was found that Santos<sup>33</sup> was the main reason for the heterogeneity of RFS. After the aforementioned study was excluded, the rest RFS studies had no significant heterogeneity according to the new meta-analysis ( $I^2 = 0.0\%$ ,  $P = 0.667$ ). However, the expression of ki67 still had no statistical significance with RFS (HR = 1.161, 95% CI: 0.896–1.504) (**Figure S1**). Using the Galbraith plot (**Fig. 3B**), it was found that Santos,<sup>33</sup> Park,<sup>14</sup> and van Rhijn<sup>29</sup> were the main reason for the heterogeneity of PFS. After these studies were excluded, the remaining RFS studies had no significant heterogeneity according to the new meta-analysis ( $I^2 = 0.0\%$ ,  $P = 0.497$ ). The expression of ki67 still had statistical significance with PFS (HR = 2.922, 95% CI: 2.002–4.266) (**Figure S2**).

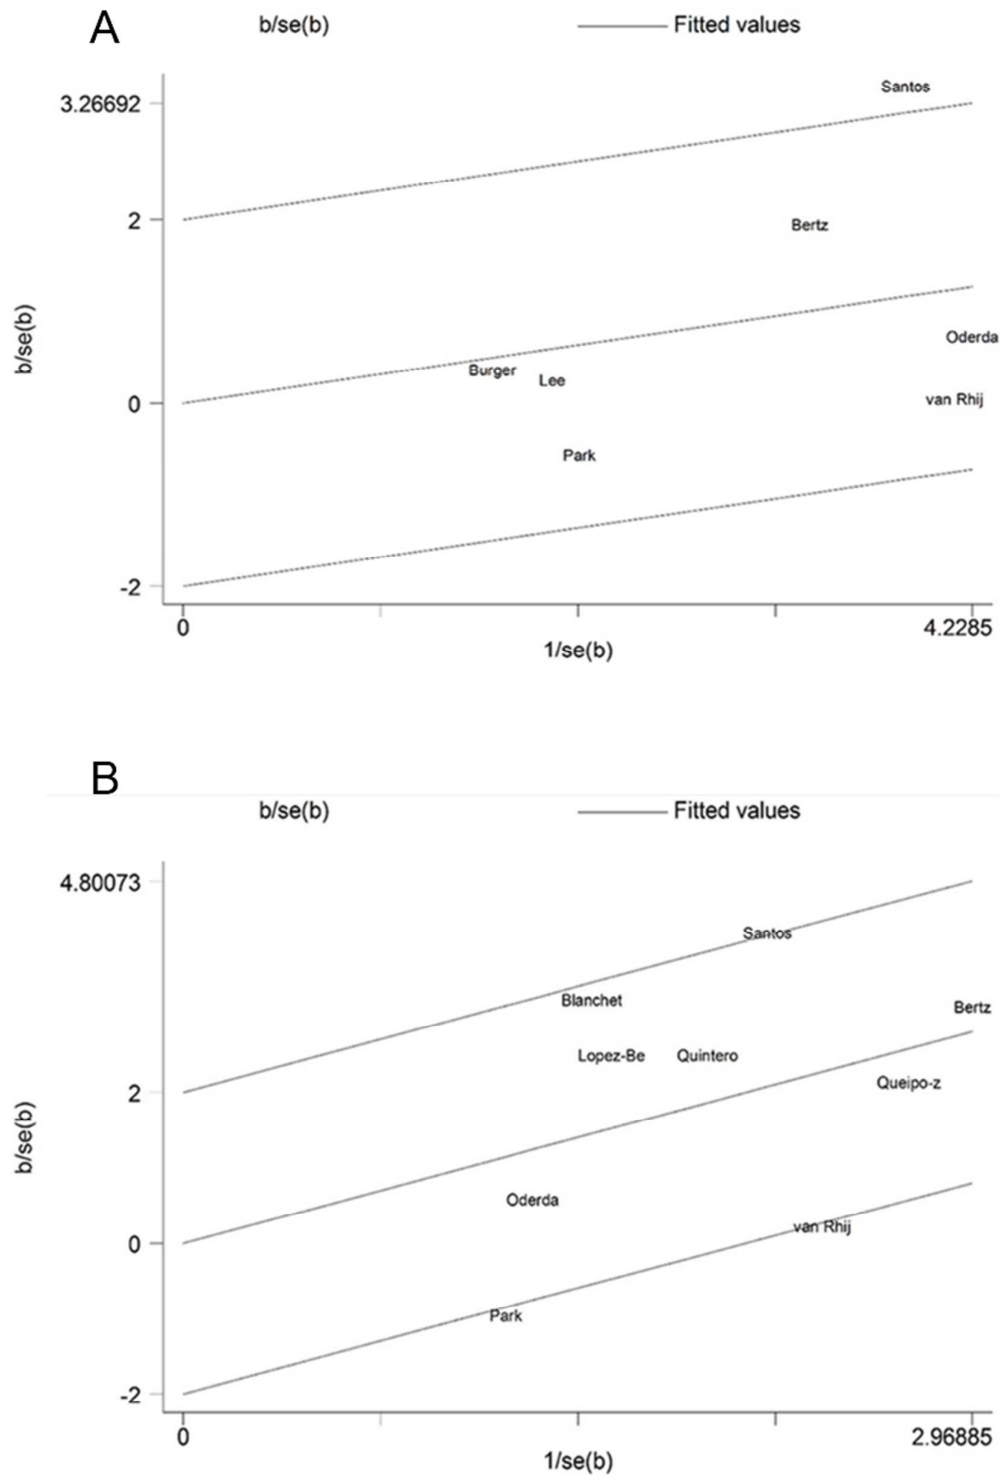

**Figure 3.** Galbraith plot analysis was used to evaluate heterogeneity. It suggested that two studies were the potential source of heterogeneity for RFS (A), while one was the source of heterogeneity for PFS (B).

### *Meta-regression analysis*

The meta-regression analysis indicated that the factors influencing heterogeneity (publication time, research region, sample size, stage, cutoff value, age, and follow-up period) might not be the reason for RFS heterogeneity. Publication time was the reason for heterogeneity of PFS ( $P = 0.036$ ), but other factors were not (**Table S2**).

### *Publication bias*

The funnel plot (**Figure 4A**) was basically symmetrical for RFS. The results of Begg's test and Egger's test showed  $P$  (Begg's) = 0.761,  $P$  (Egger's) = 0.601. The funnel plot (**Figure 4B**) was also basically symmetrical for PFS. The results of Begg's test and Egger's test showed  $P$  (Begg's) = 0.917,  $P$  (Egger's) = 0.964.

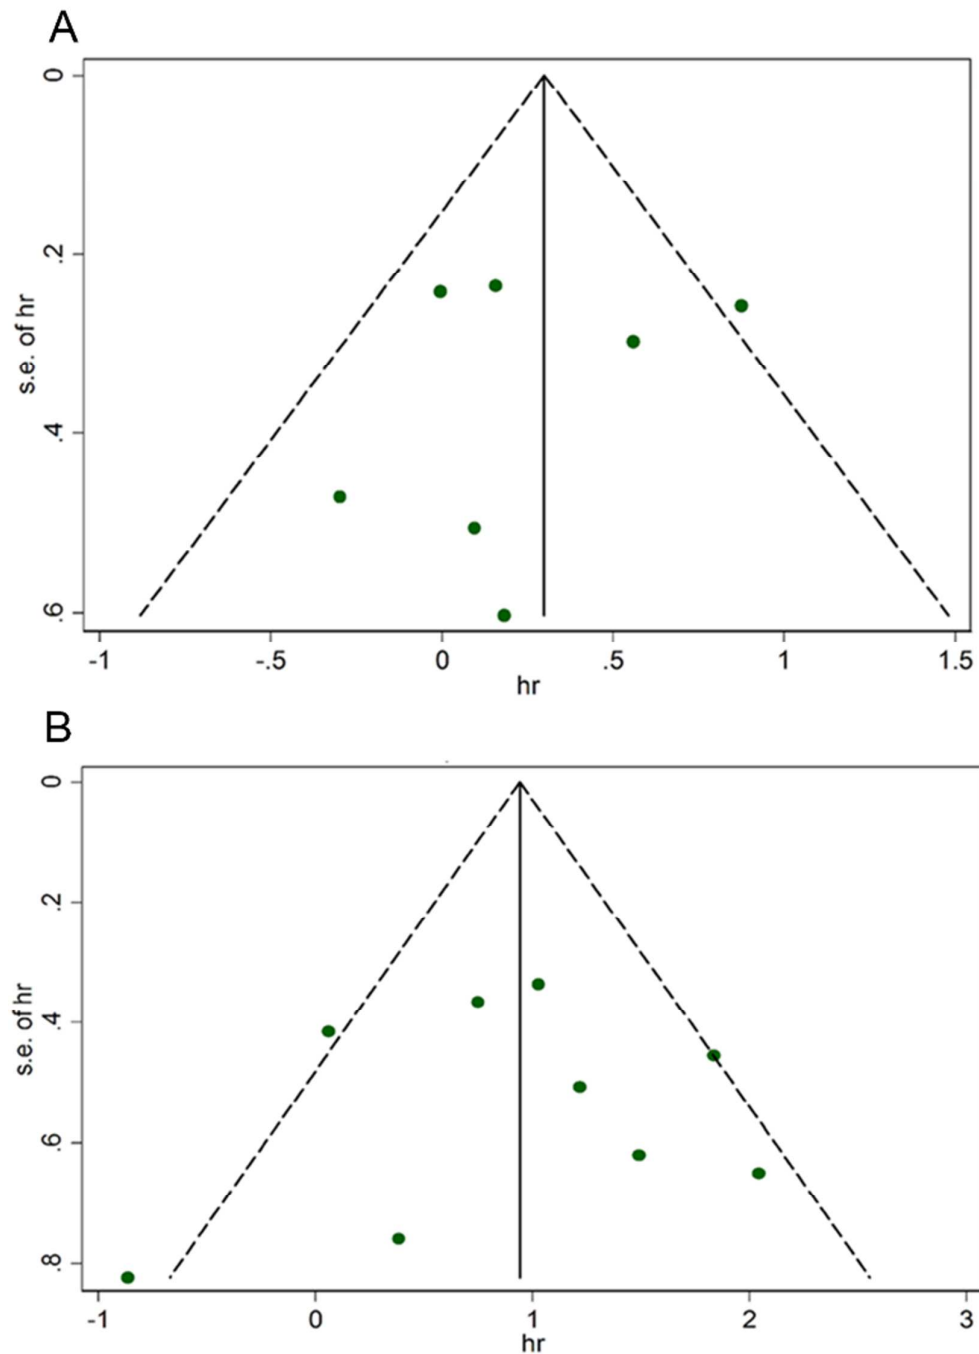

47 **Figure 4.** Funnel plots of the expression of ki67 and RFS (A) or PFS (B).  
48  
49

50  
51 **Discussion**  
52

53 A total of 11 published studies with 1321 cases complying with the inclusion criteria  
54  
55

1  
2  
3 were enrolled in this meta-analysis. The results of the meta-analysis indicated that the  
4  
5 expression of ki67 had no statistical significance with RFS, but it had significance  
6  
7 with PFS. The overexpression of ki67 was the risk factor for PFS. It suggested that  
8  
9 ki67 was the prognostic predictive marker for patients with NMIBC after BCG  
10  
11 therapy. Besides, the aforementioned conditions did not change after excluding the  
12  
13 published studies possibly causing heterogeneity and reperforming the meta-analysis.  
14  
15 It further proved that the result of the aforementioned meta-analysis was stable, that  
16  
17 is, the overexpression of ki67 was the risk factor for PFS. In the Caucasian subgroup,  
18  
19 the overexpression of ki67 was the risk factor for PFS and RFS, suggesting the racial  
20  
21 classification and regional factor might play important roles in the prognosis of  
22  
23 patients with NMIBC after BCG therapy. In the two subgroups based on age, the  
24  
25 overexpression of ki67 was the risk factor for PFS, suggesting that age was the  
26  
27 important factor influencing the prognosis of bladder cancer. The elder the patient, the  
28  
29 worse the prognosis would be. Besides, the meta-regression analysis indicated  
30  
31 publication time as the reason for PFS heterogeneity. The cumulative meta-analysis  
32  
33 indicated that the expression of ki67 had statistical significance with RFS and PFS. It  
34  
35 suggested that the correlation of the expression of ki67 with RFS and PFS needed  
36  
37 further exploration to observe the following changes. Besides, according to the funnel  
38  
39 plot, Begg's test, and Egger's test, the enrolled studies had no significant publication  
40  
41 bias. Thus, the reliability of the present meta-analysis was high.

42  
43  
44  
45  
46 In 2016, the European Association of Urology (EUA)<sup>36</sup> recommended a scoring  
47  
48 system for the prognostic evaluation of NMIBC based on six clinical and pathological  
49  
50 factors built by European Organization for the Research and Treatment of  
51  
52 Cancer-Genito-Urinary Cancer Group (EORTC), including number of tumors, tumor  
53  
54 size, prior recurrence rate, T category, presence of concurrent carcinoma in situ, and  
55

1  
2  
3 tumor grade (**Table S3**). The patients were categorized into low-risk tumors,  
4  
5 intermediate-risk tumors, and high-risk tumors using this assessment system to  
6  
7 evaluate the prognosis. For the patients after BCG therapy, the EUA recommended  
8  
9 another risk calculator developed by the Club Urologico Espanol de Tratamiento  
10  
11 Oncologico (CUETO) and the EORTC. This calculator based on gender, age,  
12  
13 recurrent tumor, number of tumors, T category, associated Tis, and grade. The  
14  
15 CUETO risk calculator can be achieved at <http://www.aeu.es/Cueto.html>. For the two  
16  
17 scales for patients with NMIBC, no matter used alone or combined, the recommended  
18  
19 level was B grade. The two scales could be used together in the clinic. When using the  
20  
21 CUETO scale, the calculated recurrent risk was lower than that from the EORTC  
22  
23 scale,<sup>37</sup> which might be related to the special design in the CUETO scale for the  
24  
25 patients receiving BCG intravesical immunotherapy. However, the scoring system  
26  
27 only depending on clinical and pathological factors could not accurately evaluate the  
28  
29 prognosis of bladder cancer patients in T1 stage due to the independence of disease  
30  
31 condition in each patient.<sup>38</sup> The markers regulated at the genetic level may judge the  
32  
33 prognosis of bladder cancer patients with the development of precision medicine. A  
34  
35 reliable marker helps in recognizing the patients who failed in BCG intravesical  
36  
37 immunotherapy with high risk in time. Hence, these patients can undergo radical  
38  
39 cystectomy or other treatments in time. Unfortunately, no prognostic marker has been  
40  
41 applied in clinic currently.

42  
43  
44  
45  
46 Ki67 is a nucleoprotein that can be detected in the cell cycles except G0 phase.<sup>39</sup> The  
47  
48 expression of human ki67 protein is closely related to proliferation. Therefore, it is an  
49  
50 ideal marker to confirm the growth fraction of specific cell colony.<sup>40</sup> Ki67 is a widely  
51  
52 known amplified biomarker. The ki67 monoclonal antibody can be detected by the  
53  
54 immunohistochemical method.<sup>41</sup> Ki67 has been proved to be a good proliferation

1  
2  
3 marker in different cancers, including bladder cancer.<sup>42</sup>

4  
5 So far, some meta-analyses have studied the effect of ki67 on the prognostic quality of  
6  
7 life of esophageal cancer, breast cancer, epithelial ovarian cancer, and so on.<sup>43-45</sup> Some  
8  
9 studies have also focused on the other aspects of bladder cancer. Using meta-analysis,  
10  
11 Luo<sup>46</sup> believed that a high reactivity of ki67 could predict the poor prognosis in  
12  
13 patients with bladder cancer. The univariate analysis showed that cancer-specific  
14  
15 survival, disease-free survival, overall survival, PFS, and RFS had a significant  
16  
17 correlation with poor prognosis in patients with a high reactivity of ki67. However,  
18  
19 this study enrolled all types of bladder tumors and all the therapies for NMIBC.  
20  
21 Currently, the treated bladder cancer in the clinic is mainly NMIBC. Thus, most of the  
22  
23 applied therapy is TUR combined with installations of chemotherapy or BCG  
24  
25 intravesical immunotherapy based on the patients' conditions. Therefore, this analysis  
26  
27 had a certain limitation in the prognosis judgment on the patients with NMIBC after  
28  
29 BCG intravesical immunotherapy.  
30  
31  
32  
33

34  
35 Currently, few evidence-based studies focused on the prognosis of patients with  
36  
37 NMIBC after BCG intravesical immunotherapy. Using meta-analysis, Zhou<sup>47</sup>  
38  
39 analyzed the correlation between the expression of p53 and quality of life of patients  
40  
41 with NMIBC after BCG intravesical immunotherapy. They believed that the  
42  
43 overexpression of p53 in patients with NMIBC treated with BCG might be associated  
44  
45 with RFS, especially in Asian population. Similarly, Du<sup>48</sup> also performed the  
46  
47 meta-analysis on the relationship between p53 status and NMIBC in T1 stage and  
48  
49 believed that the overexpression of p53 might be related to the development of  
50  
51 NMIBC. The present study indicated that the overexpression of ki67 was the risk  
52  
53 factor for PFS, but the expression of ki67 had no statistical significance with RFS. For  
54  
55  
56  
57  
58  
59  
60



1  
2  
3 Caucasians, the overexpression of ki67 was the risk factor for PFS and RFS. P53 is  
4 the most common inactivated tumor suppressor gene in tumor cells.<sup>49</sup> The inactivation  
5 of p53 may cause cell abnormal hyperplasia and cancerization. The variation in p53  
6 results in enhanced proliferation, invasion, and metabolism.<sup>50</sup> The increase in the  
7 expression of ki67 ,as cell proliferation marker ,suggests enhanced proliferation.<sup>40</sup> As  
8  
9 a tumor suppressor gene with complicated function, the range of effects of p53 is  
10 wider. The accuracy in the prediction of quality of life may not be more appropriate  
11 compared with ki67. The genetic difference between Asians and Caucasians suggests  
12 that different prediction systems should be built for different races. Besides, p27,  
13 E2F1, ezrin, and CK20 were also studied in other investigations for predicting  
14 NMIBC prognosis, which could be further explored comparing their advantages used  
15 alone or combined.

16  
17 However, this study still had some limitations. First, some of the enrolled published  
18 studies were retrospective studies, involving different populations, using different  
19 techniques, and with different cutoff values. All these reasons might have caused the  
20 heterogeneity. Second, the meta-analysis included English published studies.  
21 Although Begg's test and Egger's test did not suggest publication bias, this study  
22 could still be influenced by the bias. Finally, the surgical skills were different in  
23 different published studies, which might affect effectiveness judgment of BCG.

### 24 25 26 27 28 29 30 31 32 33 34 35 36 37 38 39 40 41 42 43 44 45 46 47 **Conclusions**

48  
49 For the patients with NMIBC treated with BCG intravesical immunotherapy, the  
50 overexpression of ki67 was the risk factor for PFS, the overexpression of ki67 was the  
51 risk factor for PFS, but the relationship between ki67 expression and PFS had no

1  
2  
3 statistical significance. In the Caucasian subgroup, the overexpression of ki67 was the  
4 risk factor for PFS and RFS. Owing to the aforementioned limitations of the present  
5 study, RCTs with large sample size are still required to validate the results.  
6  
7

### 8 9 **Contributors**

10  
11 Conceived and designed the experiments: YHH NW XFZ. Extracted the data: XC  
12 YSD ZSD JFW YHH NW XFZ. Analyzed the data: YHH NW XFZ. Contributed  
13 reagents/materials/analysis tools: ZSD JFW XC. Wrote the paper: YHH NW.  
14 Critically revised the report: XFZ.  
15  
16  
17  
18  
19  
20  
21

### 22 **Funding**

23  
24 This study was supported by grants from the International S&T Cooperation Program  
25 of China (ISTCP) (Grant No.2014DFE30010).  
26  
27  
28  
29  
30

### 31 **Disclaimer**

32  
33 Its contents are solely the responsibility of the author. The funders had no role in  
34 study design, data collection and analysis, decision to publish, or preparation of the  
35 manuscript.  
36  
37  
38  
39  
40

### 41 **Competing interests**

42  
43 None declared.  
44  
45  
46  
47

### 48 **Data sharing statement**

49  
50 No additional data available  
51  
52  
53  
54  
55  
56  
57  
58  
59  
60

## Reference

1. Ploeg M, Aben KK, Kiemeny LA. The present and future burden of urinary bladder cancer in the world. *World J Urol* 2009;**27**:289-93. doi:10.1007/s00345-009-0383-3.
2. Torre LA, Bray F, Siegel RL, *et al*. Global cancer statistics, 2012. *CA Cancer J Clin* 2015;**65**:87-108. doi:10.3322/caac.21262.
3. Ro JY, Staerckel GA, Ayala AG. Cytologic and histologic features of superficial bladder cancer. *Urol Clin North Am* 1992;**19**:435-53.
4. Woldu SL, Bagrodia A, Lotan Y. Guideline of guidelines: non-muscle-invasive bladder cancer. *BJU Int* 2017;**119**:371-80. doi:10.1111/bju.13760.
5. Brausi M, Collette L, Kurth K, *et al*. Variability in the recurrence rate at first follow-up cystoscopy after TUR in stage Ta T1 transitional cell carcinoma of the bladder: a combined analysis of seven EORTC studies. *Eur Urol* 2002;**41**:523-31.
6. Jarvinen R, Kaasinen E, Sankila A, *et al*. Long-term efficacy of maintenance bacillus Calmette-Guerin versus maintenance mitomycin C instillation therapy in frequently recurrent TaT1 tumours without carcinoma in situ: a subgroup analysis of the prospective, randomised FinnBladder I study with a 20-year follow-up. *Eur Urol* 2009;**56**:260-5. doi:10.1016/j.eururo.2009.04.009.
7. Sylvester RJ, Brausi MA, Kirkels WJ, *et al*. Long-term efficacy results of EORTC genito-urinary group randomized phase 3 study 30911 comparing intravesical instillations of epirubicin, bacillus Calmette-Guerin, and bacillus Calmette-Guerin plus isoniazid in patients with intermediate- and high-risk stage Ta T1 urothelial

- 1  
2  
3 carcinoma of the bladder. *Eur Urol* 2010;**57**:766-73.  
4  
5 doi:10.1016/j.eururo.2009.12.024.  
6  
7 8. Gual Frau J, Palou J, Rodriguez O, *et al.* Failure of Bacillus Calmette-Guerin  
8  
9 therapy in non-muscle-invasive bladder cancer: Definition and treatment options.  
10  
11 *Arch Esp Urol* 2016;**69**:423-33.  
12  
13 9. Boyd LA. Intravesical Bacillus Calmette-Guerin for treating bladder cancer. *Urol*  
14  
15 *Nurs* 2003;**23**:189-91, 99; quiz 92.  
16  
17 10. Alkhateeb SS, Neill M, Bar-Moshe S, *et al.* Long-term prognostic value of the  
18  
19 combination of EORTC risk group calculator and molecular markers in  
20  
21 non-muscle-invasive bladder cancer patients treated with intravesical Bacille  
22  
23 Calmette-Guerin. *Urol Ann* 2011;**3**:119-26. doi:10.4103/0974-7796.84954.  
24  
25 11. Mariappan P, Smith G. A surveillance schedule for G1Ta bladder cancer allowing  
26  
27 efficient use of check cystoscopy and safe discharge at 5 years based on a 25-year  
28  
29 prospective database. *J Urol* 2005;**173**:1108-11.  
30  
31 doi:10.1097/01.ju.0000149163.08521.69.  
32  
33 12. Bertz S, Otto W, Denzinger S, *et al.* Combination of CK20 and Ki-67  
34  
35 immunostaining analysis predicts recurrence, progression, and cancer-specific  
36  
37 survival in pT1 urothelial bladder cancer. *Eur Urol* 2014;**65**:218-26.  
38  
39 doi:10.1016/j.eururo.2012.05.033.  
40  
41 13. Kim K, Cho YM, Park BH, *et al.* Histological and immunohistochemical markers  
42  
43 for progression prediction in transurethraly resected high-grade non-muscle invasive  
44  
45 bladder cancer. *Int J Clin Exp Pathol* 2015;**8**:743-50.  
46  
47 14. Park J, Song C, Shin E, *et al.* Do molecular biomarkers have prognostic value in  
48  
49 primary T1G3 bladder cancer treated with bacillus Calmette-Guerin intravesical  
50  
51 therapy? *Urol Oncol* 2013;**31**:849-56. doi:10.1016/j.urolonc.2011.06.004.  
52  
53  
54  
55  
56  
57  
58  
59  
60

15. Kruger S, Thorns C, Stocker W, *et al.* Prognostic value of MCM2 immunoreactivity in stage T1 transitional cell carcinoma of the bladder. *Eur Urol* 2003;**43**:138-45.
16. Oderda M, Ricceri F, Pisano F, *et al.* Prognostic factors including Ki-67 and p53 in Bacillus Calmette-Guerin-treated non-muscle-invasive bladder cancer: a prospective study. *Urol Int* 2013;**90**:184-90. doi:10.1159/000343431.
17. Zlotta AR, Noel JC, Fayt I, *et al.* Correlation and prognostic significance of p53, p21WAF1/CIP1 and Ki-67 expression in patients with superficial bladder tumors treated with bacillus Calmette-Guerin intravesical therapy. *J Urol* 1999;**161**:792-8.
18. Saint F, Salomon L, Quintela R, *et al.* Do prognostic parameters of remission versus relapse after Bacillus Calmette-Guerin (BCG) immunotherapy exist?. analysis of a quarter century of literature. *Eur Urol* 2003;**43**:351-60; discussion 60-1.
19. Habuchi T, Marberger M, Droller MJ, *et al.* Prognostic markers for bladder cancer: International Consensus Panel on bladder tumor markers. *Urology* 2005;**66**:64-74. doi:10.1016/j.urology.2005.08.065.
20. Button KS, Ioannidis JP, Mokrysz C, *et al.* Power failure: why small sample size undermines the reliability of neuroscience. *Nat Rev Neurosci* 2013;**14**:365-76. doi:10.1038/nrn3475.
21. Liberati A, Altman DG, Tetzlaff J, *et al.* The PRISMA statement for reporting systematic reviews and meta-analyses of studies that evaluate health care interventions: explanation and elaboration. *PLoS Med* 2009;**6**:e1000100. doi:10.1371/journal.pmed.1000100.
22. Stang A. Critical evaluation of the Newcastle-Ottawa scale for the assessment of the quality of nonrandomized studies in meta-analyses. *Eur J Epidemiol* 2010;**25**:603-5. doi:10.1007/s10654-010-9491-z.

- 1  
2  
3 23. Parmar MK, Torri V, Stewart L. Extracting summary statistics to perform  
4 meta-analyses of the published literature for survival endpoints. *Stat Med*  
5 1998;**17**:2815-34.  
6  
7  
8  
9 24. DerSimonian R, Laird N. Meta-analysis in clinical trials. *Control Clin Trials*  
10 1986;**7**:177-88.  
11  
12  
13 25. Higgins JP, Thompson SG. Quantifying heterogeneity in a meta-analysis. *Stat Med*  
14 2002;**21**:1539-58. doi:10.1002/sim.1186.  
15  
16  
17 26. Bax L, Ikeda N, Fukui N, *et al.* More than numbers: the power of graphs in  
18 meta-analysis. *Am J Epidemiol* 2009;**169**:249-55. doi:10.1093/aje/kwn340.  
19  
20  
21 27. Jin M, Cai S, Guo J, *et al.* Alcohol drinking and all cancer mortality: a  
22 meta-analysis. *Ann Oncol* 2013;**24**:807-16. doi:10.1093/annonc/mds508.  
23  
24  
25 28. Quintero A, Alvarez-Kindelan J, Luque RJ, *et al.* Ki-67 MIB1 labelling index and  
26 the prognosis of primary TaT1 urothelial cell carcinoma of the bladder. *J Clin Pathol*  
27 2006;**59**:83-8. doi:10.1136/jcp.2004.022939.  
28  
29  
30 29. van Rhijn BW, Liu L, Vis AN, *et al.* Prognostic value of molecular markers,  
31 sub-stage and European Organisation for the Research and Treatment of Cancer risk  
32 scores in primary T1 bladder cancer. *BJU Int* 2012;**110**:1169-76.  
33 doi:10.1111/j.1464-410X.2012.10996.x.  
34  
35  
36 30. Burger M, Denzinger S, Hartmann A, *et al.* Mcm2 predicts recurrence hazard in  
37 stage Ta/T1 bladder cancer more accurately than CK20, Ki67 and histological grade.  
38 *Br J Cancer* 2007;**96**:1711-5. doi:10.1038/sj.bjc.6603784.  
39  
40  
41 31. Queipo-Zaragoza JA, Ruiz-Cerda JL, Vera-Donoso CD, *et al.* Prognostic value of  
42 p53, Ki-67, microstaging and microvessel density in pT1G3 bladder tumors: creation  
43 of risk groups for progression. *Scand J Urol Nephrol* 2007;**41**:283-9.  
44 doi:10.1080/00365590601183055.  
45  
46  
47  
48  
49  
50  
51  
52  
53  
54  
55  
56  
57  
58  
59  
60

- 1  
2  
3 32. Lopez-Beltran A, Luque RJ, Alvarez-Kindelan J, *et al.* Prognostic factors in stage  
4 T1 grade 3 bladder cancer survival: the role of G1-S modulators (p53, p21Waf1,  
5 p27kip1, Cyclin D1, and Cyclin D3) and proliferation index (ki67-MIB1). *Eur Urol*  
6 2004;**45**:606-12. doi:10.1016/j.eururo.2003.11.011.  
7  
8  
9  
10  
11 33. Santos L, Amaro T, Costa C, *et al.* Ki-67 index enhances the prognostic accuracy  
12 of the urothelial superficial bladder carcinoma risk group classification. *Int J Cancer*  
13 2003;**105**:267-72. doi:10.1002/ijc.11049.  
14  
15  
16  
17 34. Blanchet P, Droupy S, Eschwege P, *et al.* Prospective evaluation of Ki-67 labeling  
18 in predicting the recurrence and progression of superficial bladder transitional cell  
19 carcinoma. *Eur Urol* 2001;**40**:169-75. doi:49768.  
20  
21  
22  
23 35. Lee E, Park I, Lee C. Prognostic markers of intravesical bacillus Calmette-Guerin  
24 therapy for multiple, high-grade, stage T1 bladder cancers. *Int J Urol* 1997;**4**:552-6.  
25  
26  
27  
28 36. Babjuk M, Bohle A, Burger M, *et al.* EAU Guidelines on Non-Muscle-invasive  
29 Urothelial Carcinoma of the Bladder: Update 2016. *Eur Urol* 2017;**71**:447-61.  
30  
31  
32  
33  
34  
35 37. Fernandez-Gomez J, Madero R, Solsona E, *et al.* Predicting nonmuscle invasive  
36 bladder cancer recurrence and progression in patients treated with bacillus  
37 Calmette-Guerin: the CUETO scoring model. *J Urol* 2009;**182**:2195-203.  
38  
39  
40  
41  
42  
43  
44 38. Kiemeny LA, Witjes JA, Heijbroek RP, *et al.* Predictability of recurrent and  
45 progressive disease in individual patients with primary superficial bladder cancer. *J*  
46  
47  
48  
49  
50 39. Gerdes J, Lemke H, Baisch H, *et al.* Cell cycle analysis of a cell  
51 proliferation-associated human nuclear antigen defined by the monoclonal antibody  
52  
53  
54  
55  
56  
57  
58  
59  
60

- 1  
2  
3 40. Scholzen T, Gerdes J. The Ki-67 protein: from the known and the unknown. *J Cell*  
4  
5 *Physiol* 2000;**182**:311-22.  
6  
7 doi:10.1002/(sici)1097-4652(200003)182:3<311::aid-jcp1>3.0.co;2-9.  
8  
9 41. Gerdes J, Li L, Schlueter C, *et al.* Immunobiochemical and molecular biologic  
10  
11 characterization of the cell proliferation-associated nuclear antigen that is defined by  
12  
13 monoclonal antibody Ki-67. *Am J Pathol* 1991;**138**:867-73.  
14  
15 42. Rodriguez-Alonso A, Pita-Fernandez S, Gonzalez-Carrero J, *et al.* p53 and ki67  
16  
17 expression as prognostic factors for cancer-related survival in stage T1 transitional  
18  
19 cell bladder carcinoma. *Eur Urol* 2002;**41**:182-8; discussion 88-9.  
20  
21 43. McCormick Matthews LH, Noble F, Tod J, *et al.* Systematic review and  
22  
23 meta-analysis of immunohistochemical prognostic biomarkers in resected  
24  
25 oesophageal adenocarcinoma. *Br J Cancer* 2015;**113**:107-18.  
26  
27 doi:10.1038/bjc.2015.179.  
28  
29 44. Gui Y, Xu S, Yang X, *et al.* A meta-analysis of biomarkers for the prognosis of  
30  
31 triple-negative breast cancer patients. *Biomark Med* 2016;**10**:771-90.  
32  
33 doi:10.2217/bmm-2015-0064.  
34  
35 45. Qiu HL, Deng SZ, Li C, *et al.* High expression of KIF14 is associated with poor  
36  
37 prognosis in patients with epithelial ovarian cancer. *Eur Rev Med Pharmacol Sci*  
38  
39 2017;**21**:239-45.  
40  
41 46. Luo Y, Zhang X, Mo M, *et al.* High Ki-67 Immunohistochemical Reactivity  
42  
43 Correlates With Poor Prognosis in Bladder Carcinoma: A Comprehensive  
44  
45 Meta-Analysis with 13,053 Patients Involved. *Medicine (Baltimore)* 2016;**95**:e3337.  
46  
47 doi:10.1097/md.0000000000003337.  
48  
49 47. Zhou X, Zhang G, Tian Y. p53 Status correlates with the risk of recurrence in  
50  
51 non-muscle invasive bladder cancers treated with Bacillus Calmette-Guerin: a  
52  
53  
54  
55  
56  
57  
58  
59  
60



1  
2  
3 meta-analysis. *PLoS One* 2015;**10**:e0119476. doi:10.1371/journal.pone.0119476.

4  
5 48. Du J, Wang SH, Yang Q, *et al.* p53 status correlates with the risk of progression in  
6  
7 stage T1 bladder cancer: a meta-analysis. *World J Surg Oncol* 2016;**14**:137.  
8  
9 doi:10.1186/s12957-016-0890-9.

10  
11 49. Fridman JS, Lowe SW. Control of apoptosis by p53. *Oncogene* 2003;**22**:9030-40.  
12  
13 doi:10.1038/sj.onc.1207116.

14  
15 50. Muller PA, Vousden KH, Norman JC. p53 and its mutants in tumor cell migration  
16  
17 and invasion. *J Cell Biol* 2011;**192**:209-18. doi:10.1083/jcb.201009059.  
18  
19  
20  
21  
22  
23  
24  
25  
26  
27  
28  
29  
30  
31  
32  
33  
34  
35  
36  
37  
38  
39  
40  
41  
42  
43  
44  
45  
46  
47  
48  
49  
50  
51  
52  
53  
54  
55  
56  
57  
58  
59  
60

1  
2  
3  
4  
5  
6  
7  
8  
9  
10 **Supplementary File**

11 **Table S1.** PRISMA

12  
13 **Table S2.** Meta-regression analysis of RFS and PFS

14  
15  
16 **Table S3.** Risk group stratification in NMIBC

17  
18 **Figure S1.** Forest plots of HRs estimated for the relationship between the expression  
19 of ki67 and RFS after the aforementioned study was excluded.

20  
21  
22 **Figure S2.** Forest plots of HRs estimated for the relationship between the expression  
23 of ki67 and PFS after the aforementioned study was excluded  
24  
25  
26  
27  
28  
29  
30  
31  
32  
33  
34  
35  
36  
37  
38  
39  
40  
41  
42  
43  
44  
45  
46  
47  
48  
49  
50  
51  
52  
53  
54  
55  
56  
57  
58  
59  
60

**Table 1.** Main characteristics of all studies included in this meta-analysis

| Study                         | Year | Country             | Male/Female | No. of patients | Age (year)     | Follow-up (month) | Stage     | Cutoff | Survival analysis |
|-------------------------------|------|---------------------|-------------|-----------------|----------------|-------------------|-----------|--------|-------------------|
| Oderda <sup>16</sup>          | 2013 | Italy               | 166/26      | 192             | 73.2 (SD 11.9) | 100 (2–229)       | All NMIBC | 20%    | RFS               |
| Park <sup>14</sup>            | 2013 | Korea               | 53/8        | 61              | 66 (31–85)     | 60 (6–217)        | T1G3      | 10.4%  | RFS/PFS           |
| Quintero <sup>28</sup>        | 2013 | Spain               | 143/21      | 164             | 61 (29–93)     | 75 (60–144)       | Ta        | 13%    | PFS               |
| Bertz <sup>12</sup>           | 2012 | Germany             | 237/72      | 309             | 71.7 (38–87)   | 49 (5–172)        | pT1       | 15%    | RFS/PFS           |
| van Rhijn <sup>29</sup>       | 2012 | Netherlands, Canada | 105/24      | 129             | 68.8 (SD 9.9)  | 78 (39.6–110.4)   | T1        | 25%    | RFS/PFS           |
| Burger <sup>30</sup>          | 2007 | Germany             | 45/21       | 71              | 71 (52–94)     | 39 (1–133)        | T1/Ta     | 15%    | RFS               |
| Queipo-zaragoza <sup>31</sup> | 2007 | Spain               | 71/12       | 83              | 68.1 (SD 8.5)  | All >36           | T1G3      | 40%    | PFS               |
| Lopez-Beltran <sup>32</sup>   | 2004 | Spain               | 49/2        | 51              | 69.96 (49–89)  | 63.82 (60–144)    | T1G3      | 13%    | PFS               |
| Santos <sup>33</sup>          | 2003 | Portugal            | 115/44      | 159             | 66 (21–88)     | 46.5 (4–123)      | pTa/pT1   | 18%    | RFS/PFS           |
| Blanchet <sup>34</sup>        | 2001 | France              | -           | 70              | 62.6 (21–84)   | 64 (12–111)       | pT1/pTa   | 13%    | PFS               |
| Lee <sup>35</sup>             | 1997 | Korea               | 28/4        | 32              | 57.1 (30–81)   | All >24           | T1G2-3    | 20%    | RFS               |

No., number; NMIBC, non-muscle-invasive bladder cancer; RFS, recurrence-free survival; PFS, progression-free survival

1  
2  
3  
4  
5  
6  
7  
8  
9  
10  
11  
12  
13  
14  
15  
16  
17  
18  
19  
20  
21  
22  
23  
24  
25  
26  
27  
28  
29  
30  
31  
32  
33  
34  
35  
36  
37  
38  
39  
40  
41  
42  
43  
44  
45  
46  
47  
48  
49  
50  
51  
52  
53  
54  
55  
56  
57  
58  
59  
60

For peer review only

**Table 2.** Quality of the included studies assessed by NOS

| Study                         | Selection                    |                             | Comparability         |                        |                              | Exposure                  |                                                 | Non-response rate | Scores |
|-------------------------------|------------------------------|-----------------------------|-----------------------|------------------------|------------------------------|---------------------------|-------------------------------------------------|-------------------|--------|
|                               | Adequate definition of cases | Representativeness of cases | Selection of controls | Definition of controls | Control for important factor | Ascertainment of exposure | Same method to ascertain for cases and controls |                   |        |
| Oderda <sup>16</sup>          | —                            | ☆                           | ☆                     | ☆                      | ☆☆                           | ☆                         | ☆                                               | ☆                 | 8      |
| Park <sup>14</sup>            | —                            | ☆                           | ☆                     | —                      | ☆☆                           | ☆                         | ☆                                               | ☆                 | 7      |
| Quintero <sup>28</sup>        | —                            | ☆                           | ☆                     | —                      | ☆☆                           | ☆                         | ☆                                               | —                 | 6      |
| Bertz <sup>12</sup>           | —                            | ☆                           | ☆                     | —                      | ☆☆                           | ☆                         | ☆                                               | ☆                 | 7      |
| van Rhijn <sup>29</sup>       | —                            | ☆                           | ☆                     | —                      | ☆☆                           | ☆                         | ☆                                               | ☆                 | 7      |
| Burger <sup>30</sup>          | ☆                            | ☆                           | ☆                     | —                      | ☆☆                           | ☆                         | ☆                                               | —                 | 7      |
| Queipo-zaragoza <sup>31</sup> | —                            | ☆                           | ☆                     | —                      | ☆☆                           | ☆                         | ☆                                               | ☆                 | 7      |
| Lopez-Beltran <sup>32</sup>   | —                            | ☆                           | ☆                     | ☆                      | ☆☆                           | ☆                         | ☆                                               | ☆                 | 8      |
| Santos <sup>33</sup>          | —                            | ☆                           | ☆                     | —                      | ☆☆                           | ☆                         | ☆                                               | ☆                 | 7      |
| Blanchet <sup>34</sup>        | —                            | ☆                           | ☆                     | ☆                      | ☆☆                           | ☆                         | ☆                                               | ☆                 | 8      |
| Lee <sup>35</sup>             | —                            | ☆                           | ☆                     | —                      | ☆☆                           | ☆                         | ☆                                               | ☆                 | 7      |

1  
2  
3  
4  
5  
6  
7  
8  
9  
10  
11  
12  
13  
14  
15  
16  
17  
18  
19  
20  
21  
22  
23  
24  
25  
26  
27  
28  
29  
30  
31  
32  
33  
34  
35  
36  
37  
38  
39  
40  
41  
42  
43  
44  
45  
46  
47  
48  
49  
50  
51  
52  
53  
54  
55  
56  
57  
58  
59  
60

For peer review only

**Table 3.** Subgroup results of RFS and heterogeneity test

| Variables          | Study number | HR (95% CI)         | Heterogeneity test |          |                           |
|--------------------|--------------|---------------------|--------------------|----------|---------------------------|
|                    |              |                     | <i>Q</i>           | <i>P</i> | <i>I</i> <sup>2</sup> (%) |
| Total RFS          | 7            | 1.331 (0.980–1.809) | 9.48               | 0.148    | 36.7                      |
| Region             |              |                     |                    |          |                           |
| Asian              | 2            | 0.892 (0.454–1.752) | 0.32               | 0.570    | 0.0                       |
| Caucasian          | 5            | 1.441 (1.014–2.047) | 7.52               | 0.111    | 46.8                      |
| Sample size        |              |                     |                    |          |                           |
| >100               | 4            | 1.466 (0.986–2.181) | 7.44               | 0.059    | 59.7                      |
| ≤100               | 3            | 0.959 (0.534–1.725) | 0.51               | 0.777    | 0.0                       |
| Follow-up (month)  |              |                     |                    |          |                           |
| ≥60                | 3            | 1.036 (0.758–1.415) | 0.79               | 0.674    | 0.0                       |
| <60                | 4            | 1.853 (1.316–2.607) | 2.62               | 0.453    | 0.0                       |
| Stage              |              |                     |                    |          |                           |
| All NMIBC          | 3            | 1.575 (0.915–2.711) | 4.44               | 0.109    | 54.9                      |
| Others             | 4            | 1.153 (0.821–1.620) | 3.21               | 0.360    | 6.6                       |
| Cut off            |              |                     |                    |          |                           |
| 15%                | 2            | 1.625 (0.963–2.743) | 0.31               | 0.575    | 0.0                       |
| Others             | 5            | 1.252 (0.839–1.869) | 8.56               | 0.073    | 53.3                      |
| Patient age (year) |              |                     |                    |          |                           |
| ≥70                | 3            | 1.352 (0.955–1.913) | 1.16               | 0.559    | 0.0                       |
| <70                | 4            | 1.256 (0.717–2.198) | 8.32               | 0.040    | 63.9                      |

NMIBC, non-muscle-invasive bladder cancer; RFS, recurrence-free survival.

**Table 4.** Subgroup results of PFS and heterogeneity test

| Variables          | Study number | HR (95% CI)          | Heterogeneity test |          |                           |
|--------------------|--------------|----------------------|--------------------|----------|---------------------------|
|                    |              |                      | <i>Q</i>           | <i>P</i> | <i>I</i> <sup>2</sup> (%) |
| Total PFS          | 9            | 2.567 (1.562–4.219)  | 18.1               | 0.021    | 55.6                      |
| Region             |              |                      |                    |          |                           |
| Asian              | 1            | 0.421 (0.084–2.114)  | 0.00               |          |                           |
| Caucasian          | 8            | 2.883 (1.830–4.544)  | 12.99              | 0.072    | 46.1                      |
| Sample size        |              |                      |                    |          |                           |
| >100               | 5            | 2.559 (1.372–4.774)  | 9.26               | 0.055    | 56.8                      |
| ≤100               | 4            | 2.536 (0.943–6.818)  | 8.75               | 0.033    | 65.7                      |
| Follow-up (month)  |              |                      |                    |          |                           |
| ≥60                | 6            | 2.153 (0.984–4.710)  | 13.08              | 0.023    | 61.8                      |
| <60                | 3            | 3.158 (1.774–5.623)  | 3.56               | 0.169    | 43.8                      |
| Stage              |              |                      |                    |          |                           |
| All NMIBC          | 3            | 4.673 (1.938–11.264) | 3.29               | 0.193    | 39.2                      |
| Others             | 6            | 2.044 (1.213–15.040) | 9.58               | 0.088    | 47.8                      |
| Cut off            |              |                      |                    |          |                           |
| 15%                | 1            | 2.800 (1.447–5.418)  | 0.00               |          |                           |
| Others             | 8            | 2.515 (1.382–4.576)  | 17.92              | 0.012    | 60.9                      |
| Patient age (year) |              |                      |                    |          |                           |
| ≥70                | 2            | 2.519 (1.377–4.606)  | 0.60               | 0.438    | 0.0                       |
| <70                | 7            | 2.654 (1.381–5.100)  | 17.40              | 0.008    | 65.5                      |

NMIBC, non-muscle-invasive bladder cancer; PFS, progression-free survival.



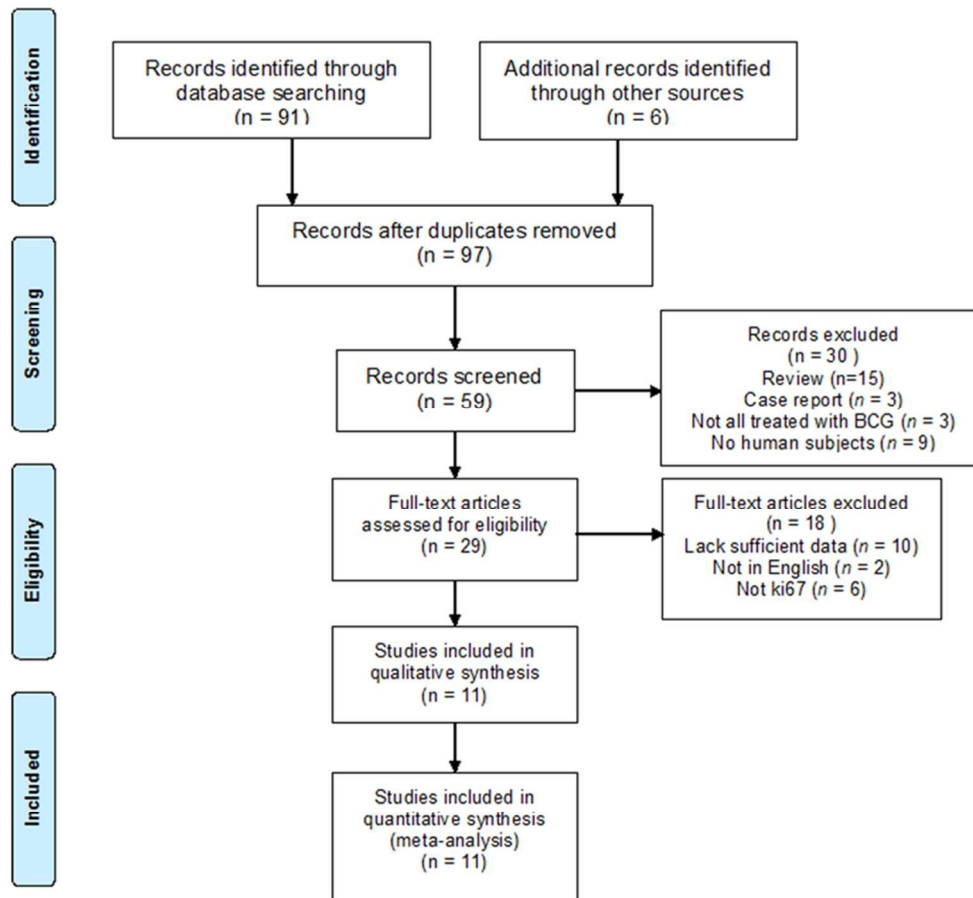

Figure 1. Flow diagram of study selection.

80x72mm (300 x 300 DPI)

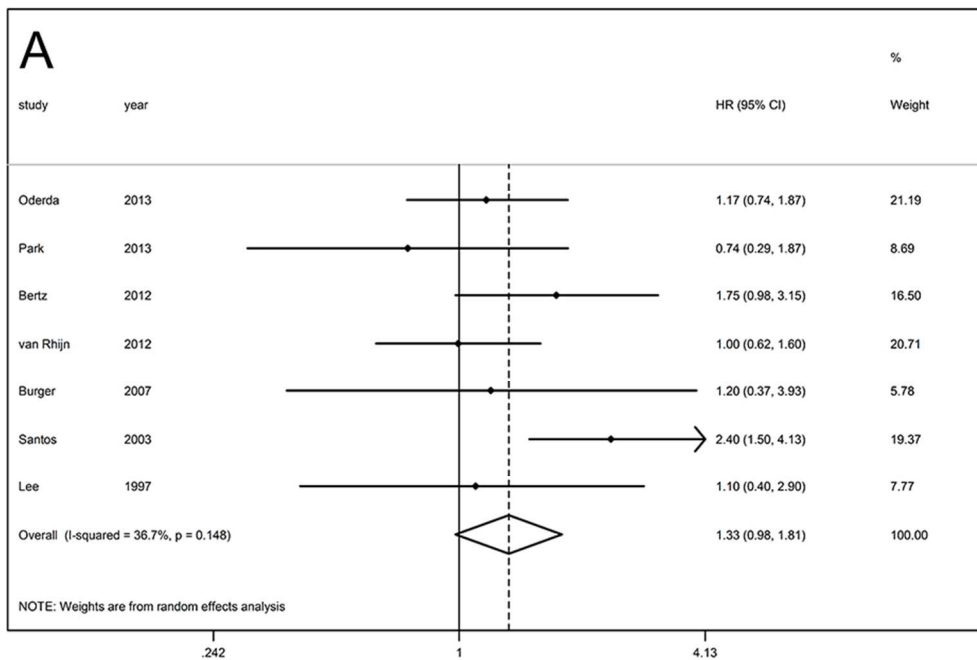

Forest plots of HRs estimated for the relationship between Ki-67 expression and RFS (A) or PFS (B) among NMIBC patients treated with BCG.

80x53mm (300 x 300 DPI)

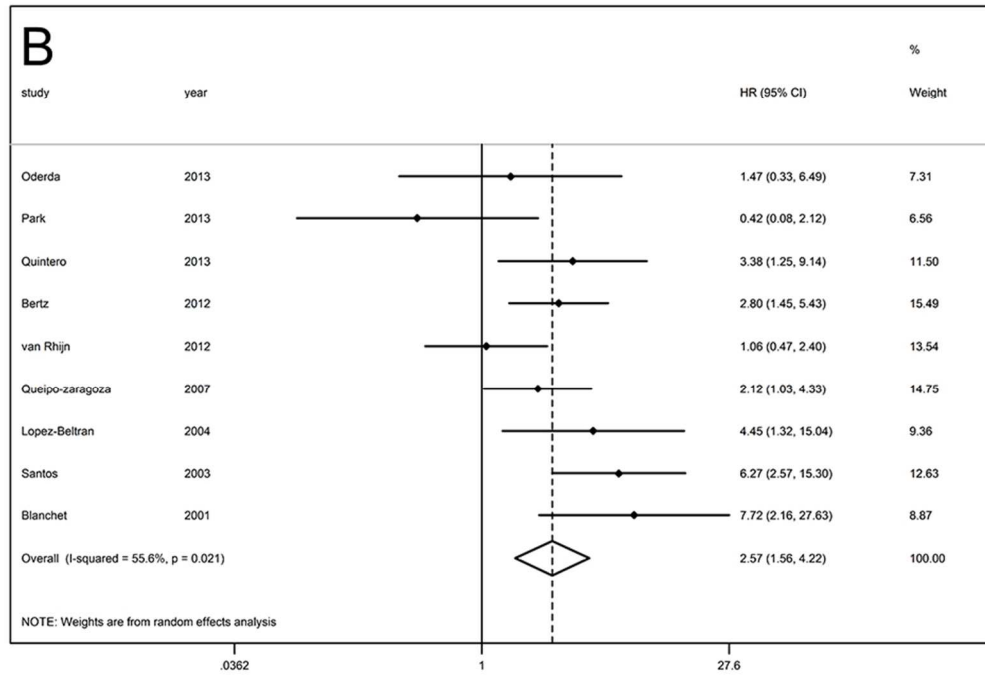

Forest plots of HRs estimated for the relationship between Ki-67 expression and RFS (A) or PFS (B) among NMIBC patients treated with BCG.

80x54mm (300 x 300 DPI)

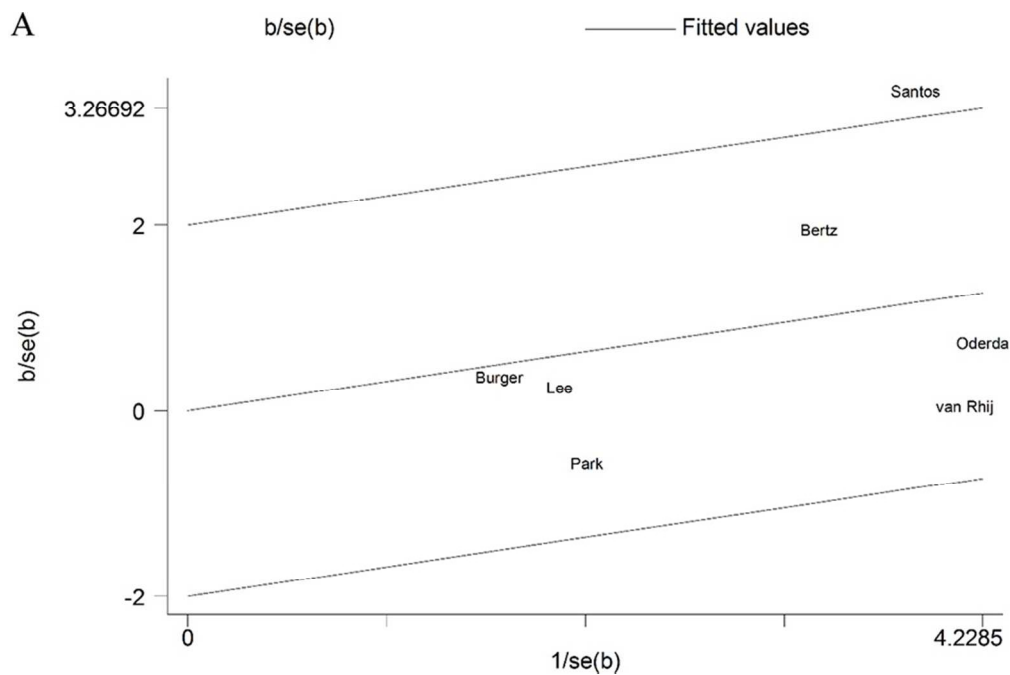

Figure 3. Galbraith plot analysis was used to evaluate heterogeneity. It suggested that two studies were the potential source of heterogeneity for RFS (A), while one was the source of heterogeneity for PFS (B)

80x52mm (300 x 300 DPI)

ew only

1  
2  
3  
4  
5  
6  
7  
8  
9  
10  
11  
12  
13  
14  
15  
16  
17  
18  
19  
20  
21  
22  
23  
24  
25  
26  
27  
28  
29  
30  
31  
32  
33  
34  
35  
36  
37  
38  
39  
40  
41  
42  
43  
44  
45  
46  
47  
48  
49  
50  
51  
52  
53  
54  
55  
56  
57  
58  
59  
60

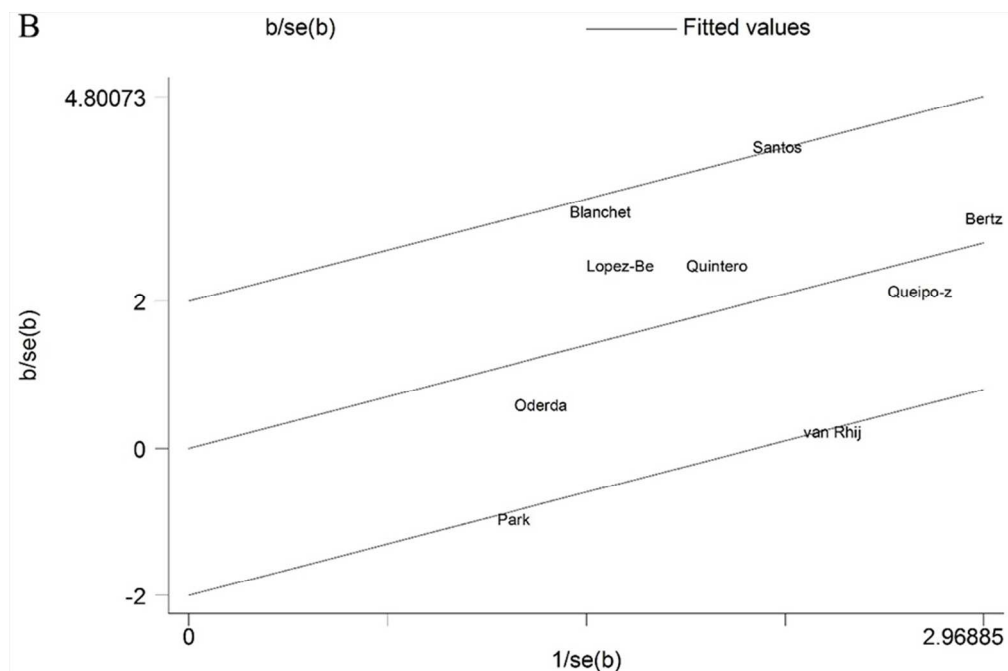

Figure 3. Galbraith plot analysis was used to evaluate heterogeneity. It suggested that two studies were the potential source of heterogeneity for RFS (A), while one was the source of heterogeneity for PFS (B)

80x53mm (300 x 300 DPI)

iew only

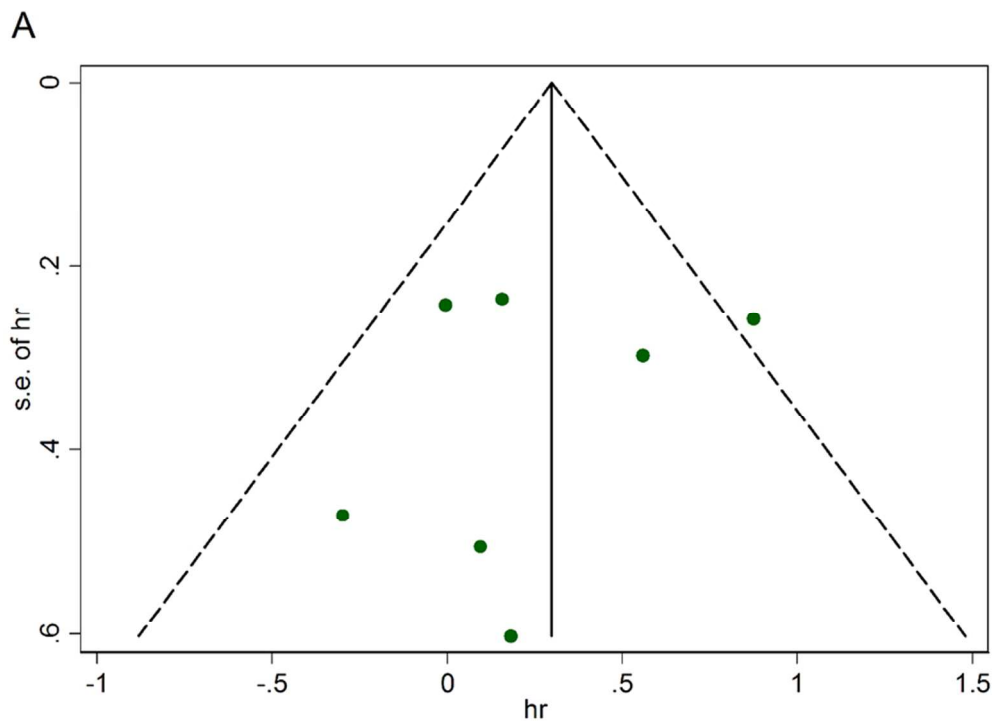

30 Figure 4. Funnel plots of the expression of ki67 and RFS (A) or PFS (B).

31  
32 80x57mm (300 x 300 DPI)

33  
34  
35  
36  
37  
38  
39  
40  
41  
42  
43  
44  
45  
46  
47  
48  
49  
50  
51  
52  
53  
54  
55  
56  
57  
58  
59  
60

Peer Review Only

1  
2  
3  
4  
5  
6  
7  
8  
9  
10  
11  
12  
13  
14  
15  
16  
17  
18  
19  
20  
21  
22  
23  
24  
25  
26  
27  
28  
29  
30  
31  
32  
33  
34  
35  
36  
37  
38  
39  
40  
41  
42  
43  
44  
45  
46  
47  
48  
49  
50  
51  
52  
53  
54  
55  
56  
57  
58  
59  
60

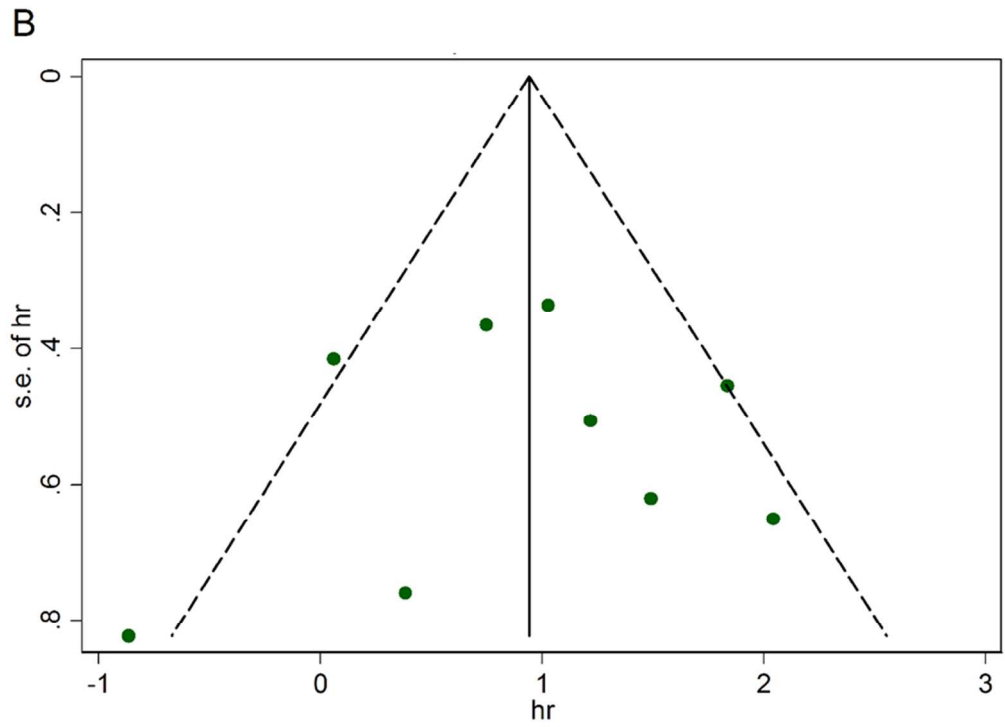

Figure 4. Funnel plots of the expression of ki67 and RFS (A) or PFS (B).

80x57mm (300 x 300 DPI)

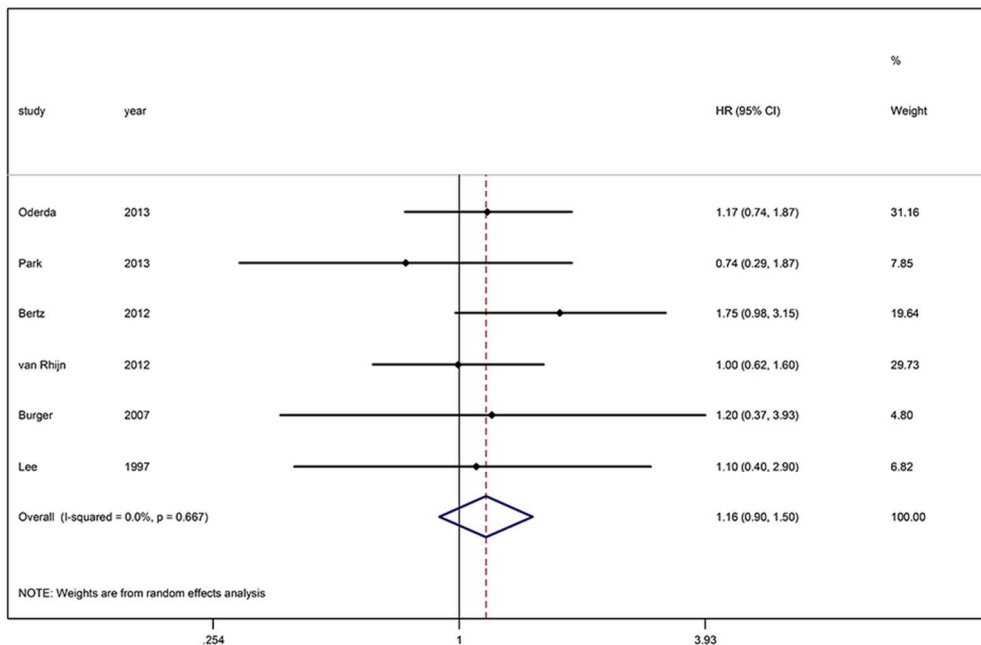

Figure S1. Forest plots of HRs estimated for the relationship between Ki-67 expression and RFS after the aforementioned study was excluded

80x52mm (300 x 300 DPI)



1  
2  
3  
4  
5  
6  
7  
8  
9  
10  
11  
12  
13  
14  
15  
16  
17  
18  
19  
20  
21  
22  
23  
24  
25  
26  
27  
28  
29  
30  
31  
32  
33  
34  
35  
36  
37  
38  
39  
40  
41  
42  
43  
44  
45  
46  
47  
48  
49  
50  
51  
52  
53  
54  
55  
56  
57  
58  
59  
60

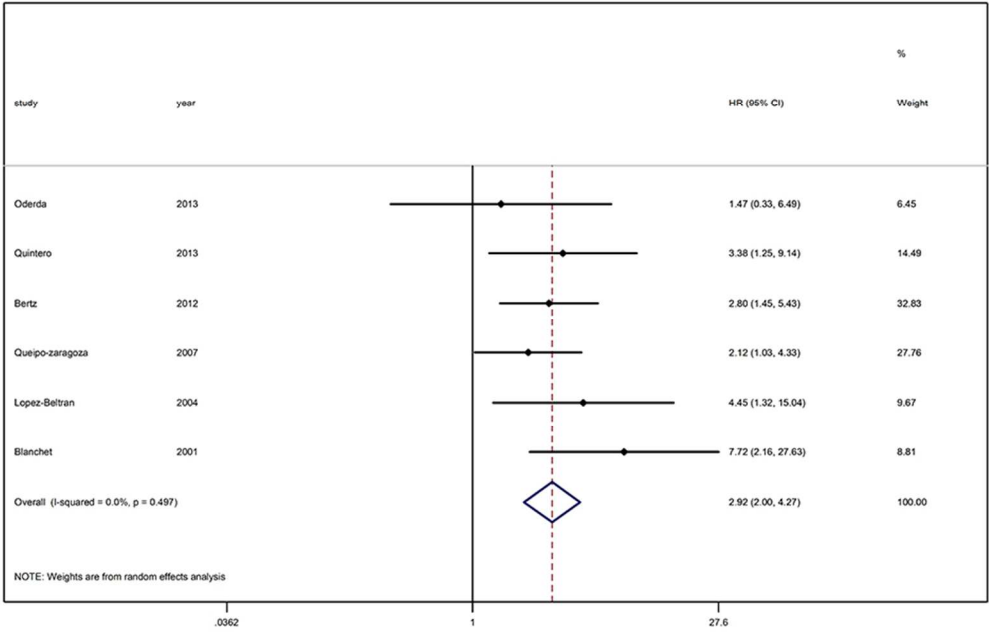

Figure S2. Forest plots of HRs estimated for the relationship between Ki-67 expression and PFS after the aforementioned study was excluded

80x51mm (300 x 300 DPI)

view only

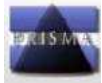

# PRISMA 2009 Checklist

| Section/topic                      | #  | Checklist item                                                                                                                                                                                                                                                                                              | Reported on page # |
|------------------------------------|----|-------------------------------------------------------------------------------------------------------------------------------------------------------------------------------------------------------------------------------------------------------------------------------------------------------------|--------------------|
| <b>TITLE</b>                       |    |                                                                                                                                                                                                                                                                                                             |                    |
| Title                              | 1  | Identify the report as a systematic review, meta-analysis, or both.                                                                                                                                                                                                                                         | 1                  |
| <b>ABSTRACT</b>                    |    |                                                                                                                                                                                                                                                                                                             |                    |
| Structured summary                 | 2  | Provide a structured summary including, as applicable: background; objectives; data sources; study eligibility criteria, participants, and interventions; study appraisal and synthesis methods; results; limitations; conclusions and implications of key findings; systematic review registration number. | 3                  |
| <b>INTRODUCTION</b>                |    |                                                                                                                                                                                                                                                                                                             |                    |
| Rationale                          | 3  | Describe the rationale for the review in the context of what is already known.                                                                                                                                                                                                                              | 6-8                |
| Objectives                         | 4  | Provide an explicit statement of questions being addressed with reference to participants, interventions, comparisons, outcomes, and study design (PICOS).                                                                                                                                                  | 6-8                |
| <b>METHODS</b>                     |    |                                                                                                                                                                                                                                                                                                             |                    |
| Protocol and registration          | 5  | Indicate if a review protocol exists, if and where it can be accessed (e.g., Web address), and, if available, provide registration information including registration number.                                                                                                                               | 8                  |
| Eligibility criteria               | 6  | Specify study characteristics (e.g., PICOS, length of follow-up) and report characteristics (e.g., years considered, language, publication status) used as criteria for eligibility, giving rationale.                                                                                                      | 8                  |
| Information sources                | 7  | Describe all information sources (e.g., databases with dates of coverage, contact with study authors to identify additional studies) in the search and date last searched.                                                                                                                                  | 8                  |
| Search                             | 8  | Present full electronic search strategy for at least one database, including any limits used, such that it could be repeated.                                                                                                                                                                               | 8                  |
| Study selection                    | 9  | State the process for selecting studies (i.e., screening, eligibility, included in systematic review, and, if applicable, included in the meta-analysis).                                                                                                                                                   | 8-9                |
| Data collection process            | 10 | Describe method of data extraction from reports (e.g., piloted forms, independently, in duplicate) and any processes for obtaining and confirming data from investigators.                                                                                                                                  | 8-9                |
| Data items                         | 11 | List and define all variables for which data were sought (e.g., PICOS, funding sources) and any assumptions and simplifications made.                                                                                                                                                                       | 9                  |
| Risk of bias in individual studies | 12 | Describe methods used for assessing risk of bias of individual studies (including specification of whether this was done at the study or outcome level), and how this information is to be used in any data synthesis.                                                                                      | 9                  |
| Summary measures                   | 13 | State the principal summary measures (e.g., risk ratio, difference in means).                                                                                                                                                                                                                               | 9-10               |
| Synthesis of results               | 14 | Describe the methods of handling data and combining results of studies, if done, including measures of consistency (e.g., $I^2$ ) for each meta-analysis.                                                                                                                                                   | 9-10               |

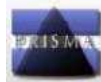

# PRISMA 2009 Checklist

Page 1 of 2

| Section/topic                 | #  | Checklist item                                                                                                                                                                                           | Reported on page # |
|-------------------------------|----|----------------------------------------------------------------------------------------------------------------------------------------------------------------------------------------------------------|--------------------|
| Risk of bias across studies   | 15 | Specify any assessment of risk of bias that may affect the cumulative evidence (e.g., publication bias, selective reporting within studies).                                                             | 10                 |
| Additional analyses           | 16 | Describe methods of additional analyses (e.g., sensitivity or subgroup analyses, meta-regression), if done, indicating which were pre-specified.                                                         | 10                 |
| <b>RESULTS</b>                |    |                                                                                                                                                                                                          |                    |
| Study selection               | 17 | Give numbers of studies screened, assessed for eligibility, and included in the review, with reasons for exclusions at each stage, ideally with a flow diagram.                                          | 10-11              |
| Study characteristics         | 18 | For each study, present characteristics for which data were extracted (e.g., study size, PICOS, follow-up period) and provide the citations.                                                             | 11-13              |
| Risk of bias within studies   | 19 | Present data on risk of bias of each study and, if available, any outcome level assessment (see item 12).                                                                                                | 14                 |
| Results of individual studies | 20 | For all outcomes considered (benefits or harms), present, for each study: (a) simple summary data for each intervention group (b) effect estimates and confidence intervals, ideally with a forest plot. | 15-21              |
| Synthesis of results          | 21 | Present results of each meta-analysis done, including confidence intervals and measures of consistency.                                                                                                  | 15-21              |
| Risk of bias across studies   | 22 | Present results of any assessment of risk of bias across studies (see Item 15).                                                                                                                          | 22                 |
| Additional analysis           | 23 | Give results of additional analyses, if done (e.g., sensitivity or subgroup analyses, meta-regression [see Item 16]).                                                                                    | 22                 |
| <b>DISCUSSION</b>             |    |                                                                                                                                                                                                          |                    |
| Summary of evidence           | 24 | Summarize the main findings including the strength of evidence for each main outcome; consider their relevance to key groups (e.g., healthcare providers, users, and policy makers).                     | 23-27              |
| Limitations                   | 25 | Discuss limitations at study and outcome level (e.g., risk of bias), and at review-level (e.g., incomplete retrieval of identified research, reporting bias).                                            | 27                 |
| Conclusions                   | 26 | Provide a general interpretation of the results in the context of other evidence, and implications for future research.                                                                                  | 28                 |
| <b>FUNDING</b>                |    |                                                                                                                                                                                                          |                    |
| Funding                       | 27 | Describe sources of funding for the systematic review and other support (e.g., supply of data); role of funders for the systematic review.                                                               | 28                 |

From: Moher D, Liberati A, Tetzlaff J, Altman DG, The PRISMA Group (2009). Preferred Reporting Items for Systematic Reviews and Meta-Analyses: The PRISMA Statement. PLoS Med 6(6): e1000097. doi:10.1371/journal.pmed1000097

For more information, visit: [www.prisma-statement.org](http://www.prisma-statement.org).

Page 2 of 2

For peer review only - <http://bmjopen.bmj.com/site/about/guidelines.xhtml>

Table S2. Meta-regression analysis of RFS and PFS

| PFS                 |             |        |          |          |
|---------------------|-------------|--------|----------|----------|
| Heterogeneity       | Coefficient | SE     | <i>t</i> | <i>P</i> |
| factor              |             |        |          |          |
| Years               | -0.0343     | 0.0283 | -1.21    | 0.280    |
| Country             |             |        |          |          |
| 1                   | -0.3899     | 0.3716 | -1.05    | 0.404    |
| 2                   | -0.7185     | 0.3503 | -2.05    | 0.177    |
| 3                   | -0.9900     | 0.4307 | -2.30    | 0.148    |
| 4                   | -0.8805     | 0.3541 | -2.49    | 0.131    |
| Numbers of patients | 0.0022      | 0.0020 | 1.16     | 0.299    |
| Stage               | None        |        |          |          |
| Cutoff              | -0.0098     | 0.0407 | -0.24    | 0.819    |
| Age                 | 0.0021      | 0.0395 | 0.05     | 0.959    |
| Follow-up           | -0.0062     | 0.0065 | -0.96    | 0.379    |
| PFS                 |             |        |          |          |
| Heterogeneity       | Coefficient | SE     | <i>t</i> | <i>P</i> |
| factor              |             |        |          |          |
| Years               | -0.1195     | 0.0461 | -2.59    | 0.036    |
| Country             |             |        |          |          |

|    |           |         |        |        |       |
|----|-----------|---------|--------|--------|-------|
| 1  |           |         |        |        |       |
| 2  |           |         |        |        |       |
| 3  |           |         |        |        |       |
| 4  | 1         | 0.2080  | 0.7936 | 0.26   | 0.818 |
| 5  |           |         |        |        |       |
| 6  | 2         | -0.8062 | 0.5662 | -1.42  | 0.290 |
| 7  |           |         |        |        |       |
| 8  | 3         | -1.4505 | 0.8858 | -1.64  | 0.243 |
| 9  |           |         |        |        |       |
| 10 |           |         |        |        |       |
| 11 | 4         | -2.7009 | 0.9407 | -2.87  | 0.103 |
| 12 |           |         |        |        |       |
| 13 | 5         | -1.7766 | 0.6167 | -2.88  | 0.102 |
| 14 |           |         |        |        |       |
| 15 | 6         | -0.8158 | 0.5281 | -1.54  | 0.262 |
| 16 |           |         |        |        |       |
| 17 |           |         |        |        |       |
| 18 | Numbers   | of      | 0.0006 | 0.0036 | 0.16  |
| 19 |           |         |        |        |       |
| 20 | patients  |         |        |        |       |
| 21 |           |         |        |        |       |
| 22 |           |         |        |        |       |
| 23 | Stage     |         |        |        |       |
| 24 |           |         |        |        |       |
| 25 | 1         | -1.4505 | 1.5909 | -0.91  | 0.458 |
| 26 |           |         |        |        |       |
| 27 | 2         | -0.8062 | 1.4108 | -0.57  | 0.625 |
| 28 |           |         |        |        |       |
| 29 |           |         |        |        |       |
| 30 | 3         | 0.2080  | 1.5332 | 0.14   | 0.904 |
| 31 |           |         |        |        |       |
| 32 |           |         |        |        |       |
| 33 | 4         | -1.7766 | 1.4353 | -1.24  | 0.341 |
| 34 |           |         |        |        |       |
| 35 | 5         | -1.2560 | 1.2069 | -1.04  | 0.407 |
| 36 |           |         |        |        |       |
| 37 |           |         |        |        |       |
| 38 | 6         | -0.6170 | 1.4689 | -0.42  | 0.715 |
| 39 |           |         |        |        |       |
| 40 | Cutoff    | -0.0177 | 0.0309 | -0.57  | 0.585 |
| 41 |           |         |        |        |       |
| 42 | Age       | -0.0672 | 0.0757 | -0.89  | 0.404 |
| 43 |           |         |        |        |       |
| 44 |           |         |        |        |       |
| 45 | Follow-up | -0.0118 | 0.0159 | -0.74  | 0.483 |
| 46 |           |         |        |        |       |
| 47 |           |         |        |        |       |
| 48 |           |         |        |        |       |
| 49 |           |         |        |        |       |
| 50 |           |         |        |        |       |
| 51 |           |         |        |        |       |
| 52 |           |         |        |        |       |
| 53 |           |         |        |        |       |
| 54 |           |         |        |        |       |
| 55 |           |         |        |        |       |
| 56 |           |         |        |        |       |
| 57 |           |         |        |        |       |
| 58 |           |         |        |        |       |
| 59 |           |         |        |        |       |
| 60 |           |         |        |        |       |

Table S3. Risk group stratification in NMIBC

|                                 |                                                                                                                                                                                        |
|---------------------------------|----------------------------------------------------------------------------------------------------------------------------------------------------------------------------------------|
| <b>Low-risk tumors</b>          | Primary, solitary, Ta, LG/G1, <3 cm, no CIS                                                                                                                                            |
| <b>Intermediate-risk tumors</b> | All tumors not defined in the two adjacent categories (between the category of low and high risk)                                                                                      |
| <b>High-risk tumors</b>         | Any of the following:<br><br>T1 tumor<br><br>HG/G3 tumor<br><br>CIS<br><br>Multiple, recurrent, and large (>3 cm)<br><br>Ta G1G2 tumors (all conditions must be present at this point) |

NMIBC, non-muscle-invasive bladder cancer; CIS, carcinoma in situ; HG, high grade; LG, low grade.

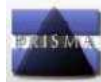

# PRISMA 2009 Checklist

| Section/topic                      | #  | Checklist item                                                                                                                                                                                                                                                                                              | Reported on page # |
|------------------------------------|----|-------------------------------------------------------------------------------------------------------------------------------------------------------------------------------------------------------------------------------------------------------------------------------------------------------------|--------------------|
| <b>TITLE</b>                       |    |                                                                                                                                                                                                                                                                                                             |                    |
| Title                              | 1  | Identify the report as a systematic review, meta-analysis, or both.                                                                                                                                                                                                                                         | 1                  |
| <b>ABSTRACT</b>                    |    |                                                                                                                                                                                                                                                                                                             |                    |
| Structured summary                 | 2  | Provide a structured summary including, as applicable: background; objectives; data sources; study eligibility criteria, participants, and interventions; study appraisal and synthesis methods; results; limitations; conclusions and implications of key findings; systematic review registration number. | 3                  |
| <b>INTRODUCTION</b>                |    |                                                                                                                                                                                                                                                                                                             |                    |
| Rationale                          | 3  | Describe the rationale for the review in the context of what is already known.                                                                                                                                                                                                                              | 6-8                |
| Objectives                         | 4  | Provide an explicit statement of questions being addressed with reference to participants, interventions, comparisons, outcomes, and study design (PICOS).                                                                                                                                                  | 6-8                |
| <b>METHODS</b>                     |    |                                                                                                                                                                                                                                                                                                             |                    |
| Protocol and registration          | 5  | Indicate if a review protocol exists, if and where it can be accessed (e.g., Web address), and, if available, provide registration information including registration number.                                                                                                                               | 8                  |
| Eligibility criteria               | 6  | Specify study characteristics (e.g., PICOS, length of follow-up) and report characteristics (e.g., years considered, language, publication status) used as criteria for eligibility, giving rationale.                                                                                                      | 8                  |
| Information sources                | 7  | Describe all information sources (e.g., databases with dates of coverage, contact with study authors to identify additional studies) in the search and date last searched.                                                                                                                                  | 8                  |
| Search                             | 8  | Present full electronic search strategy for at least one database, including any limits used, such that it could be repeated.                                                                                                                                                                               | 8                  |
| Study selection                    | 9  | State the process for selecting studies (i.e., screening, eligibility, included in systematic review, and, if applicable, included in the meta-analysis).                                                                                                                                                   | 8-9                |
| Data collection process            | 10 | Describe method of data extraction from reports (e.g., piloted forms, independently, in duplicate) and any processes for obtaining and confirming data from investigators.                                                                                                                                  | 8-9                |
| Data items                         | 11 | List and define all variables for which data were sought (e.g., PICOS, funding sources) and any assumptions and simplifications made.                                                                                                                                                                       | 9                  |
| Risk of bias in individual studies | 12 | Describe methods used for assessing risk of bias of individual studies (including specification of whether this was done at the study or outcome level), and how this information is to be used in any data synthesis.                                                                                      | 9                  |
| Summary measures                   | 13 | State the principal summary measures (e.g., risk ratio, difference in means).                                                                                                                                                                                                                               | 9-10               |
| Synthesis of results               | 14 | Describe the methods of handling data and combining results of studies, if done, including measures of consistency (e.g., $I^2$ ) for each meta-analysis.                                                                                                                                                   | 9-10               |

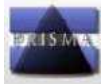

# PRISMA 2009 Checklist

Page 1 of 2

| Section/topic                 | #  | Checklist item                                                                                                                                                                                           | Reported on page # |
|-------------------------------|----|----------------------------------------------------------------------------------------------------------------------------------------------------------------------------------------------------------|--------------------|
| Risk of bias across studies   | 15 | Specify any assessment of risk of bias that may affect the cumulative evidence (e.g., publication bias, selective reporting within studies).                                                             | 10                 |
| Additional analyses           | 16 | Describe methods of additional analyses (e.g., sensitivity or subgroup analyses, meta-regression), if done, indicating which were pre-specified.                                                         | 10                 |
| <b>RESULTS</b>                |    |                                                                                                                                                                                                          |                    |
| Study selection               | 17 | Give numbers of studies screened, assessed for eligibility, and included in the review, with reasons for exclusions at each stage, ideally with a flow diagram.                                          | 10-11              |
| Study characteristics         | 18 | For each study, present characteristics for which data were extracted (e.g., study size, PICOS, follow-up period) and provide the citations.                                                             | 11-13              |
| Risk of bias within studies   | 19 | Present data on risk of bias of each study and, if available, any outcome level assessment (see item 12).                                                                                                | 14                 |
| Results of individual studies | 20 | For all outcomes considered (benefits or harms), present, for each study: (a) simple summary data for each intervention group (b) effect estimates and confidence intervals, ideally with a forest plot. | 15-21              |
| Synthesis of results          | 21 | Present results of each meta-analysis done, including confidence intervals and measures of consistency.                                                                                                  | 15-21              |
| Risk of bias across studies   | 22 | Present results of any assessment of risk of bias across studies (see Item 15).                                                                                                                          | 22                 |
| Additional analysis           | 23 | Give results of additional analyses, if done (e.g., sensitivity or subgroup analyses, meta-regression [see Item 16]).                                                                                    | 22                 |
| <b>DISCUSSION</b>             |    |                                                                                                                                                                                                          |                    |
| Summary of evidence           | 24 | Summarize the main findings including the strength of evidence for each main outcome; consider their relevance to key groups (e.g., healthcare providers, users, and policy makers).                     | 23-27              |
| Limitations                   | 25 | Discuss limitations at study and outcome level (e.g., risk of bias), and at review-level (e.g., incomplete retrieval of identified research, reporting bias).                                            | 27                 |
| Conclusions                   | 26 | Provide a general interpretation of the results in the context of other evidence, and implications for future research.                                                                                  | 28                 |
| <b>FUNDING</b>                |    |                                                                                                                                                                                                          |                    |
| Funding                       | 27 | Describe sources of funding for the systematic review and other support (e.g., supply of data); role of funders for the systematic review.                                                               | 28                 |

From: Moher D, Liberati A, Tetzlaff J, Altman DG, The PRISMA Group (2009). Preferred Reporting Items for Systematic Reviews and Meta-Analyses: The PRISMA Statement. PLoS Med 6(6): e1000097. doi:10.1371/journal.pmed1000097

For more information, visit: [www.prisma-statement.org](http://www.prisma-statement.org).

Page 2 of 2

For peer review only - <http://bmjopen.bmj.com/site/about/guidelines.xhtml>



# BMJ Open

## Prognostic Value of ki67 in Bacillus Calmette–Guérin-Treated Non-muscle-Invasive Bladder Cancer: a Meta-analysis and Systematic Review

|                                 |                                                                                                                                                                                                                                                                                                                                                                                                                                                                                                                                                                                                                                                                                                                                 |
|---------------------------------|---------------------------------------------------------------------------------------------------------------------------------------------------------------------------------------------------------------------------------------------------------------------------------------------------------------------------------------------------------------------------------------------------------------------------------------------------------------------------------------------------------------------------------------------------------------------------------------------------------------------------------------------------------------------------------------------------------------------------------|
| Journal:                        | <i>BMJ Open</i>                                                                                                                                                                                                                                                                                                                                                                                                                                                                                                                                                                                                                                                                                                                 |
| Manuscript ID                   | bmjopen-2017-019635.R1                                                                                                                                                                                                                                                                                                                                                                                                                                                                                                                                                                                                                                                                                                          |
| Article Type:                   | Research                                                                                                                                                                                                                                                                                                                                                                                                                                                                                                                                                                                                                                                                                                                        |
| Date Submitted by the Author:   | 13-Jan-2018                                                                                                                                                                                                                                                                                                                                                                                                                                                                                                                                                                                                                                                                                                                     |
| Complete List of Authors:       | He, Yuhui; Peking University China-Japan Friendship School of Clinical Medicine; China-Japan Friendship Hospital, Department of Urology<br>Wang, Ning; North China University of Science and Technology<br>Zhou, Xiaofeng; Peking University China-Japan Friendship School of Clinical Medicine; China-Japan Friendship Hospital, Department of Urology<br>Wang, Jianfeng; China-Japan Friendship Hospital, Department of Urology<br>Ding, Zhenshan; China-Japan Friendship Hospital, Department of Urology<br>Chen, Xing ; China-Japan Friendship Hospital, Department of Urology<br>Deng, Yisen; Peking University China-Japan Friendship School of Clinical Medicine; China-Japan Friendship Hospital, Department of Urology |
| <b>Primary Subject Heading</b>: | Urology                                                                                                                                                                                                                                                                                                                                                                                                                                                                                                                                                                                                                                                                                                                         |
| Secondary Subject Heading:      | Urology                                                                                                                                                                                                                                                                                                                                                                                                                                                                                                                                                                                                                                                                                                                         |
| Keywords:                       | ki67, meta-analysis, non-muscular-invasive bladder cancer, prognosis                                                                                                                                                                                                                                                                                                                                                                                                                                                                                                                                                                                                                                                            |
|                                 |                                                                                                                                                                                                                                                                                                                                                                                                                                                                                                                                                                                                                                                                                                                                 |

SCHOLARONE™  
Manuscripts

1  
2  
3 **Prognostic Value of ki67 in Bacillus Calmette–Guérin-Treated**  
4  
5  
6 **Non-muscle-Invasive Bladder Cancer: a Meta-analysis and**  
7  
8 **Systematic Review**  
9

10  
11 Yuhui He<sup>1,2</sup>, Ning Wang<sup>3</sup>, Xiaofeng Zhou<sup>1,2\*</sup>, Jianfeng Wang<sup>2</sup>, Zhenshan Ding<sup>2</sup>, Xing  
12  
13 Chen<sup>2</sup>, Yisen Deng<sup>1,2</sup>  
14

15  
16  
17 <sup>1</sup> Peking University China-Japan Friendship School of Clinical Medicine, Beijing  
18  
19 100029, China  
20

21 <sup>2</sup> Department of Urology, China-Japan Friendship Hospital, Beijing 100029, China  
22

23 <sup>3</sup> North China University of Science and Technology, Tangshan 063013, China  
24  
25

26  
27  
28 **\*Corresponding Author**  
29

30 Xiaofeng Zhou  
31

32 Peking University China-Japan Friendship School of Clinical Medicine, Beijing  
33  
34 100029, China  
35

36 Department of Urology, China-Japan Friendship Hospital, Beijing 100029, China  
37

38  
39 **Tel:** +86 13121391766  
40

41 **Email:** doctorzxf@126.com  
42

43 **Fax:** +86 64217749  
44  
45

46  
47 **Word count**  
48

49 Title page: 98  
50

51 Abstract: 251  
52

53 References: 1403  
54  
55

1  
2  
3 Number of tables, figures, supplementary files: 4, 4, 5  
4  
5  
6  
7  
8  
9  
10  
11  
12  
13  
14  
15  
16  
17  
18  
19  
20  
21  
22  
23  
24  
25  
26  
27  
28  
29  
30  
31  
32  
33  
34  
35  
36  
37  
38  
39  
40  
41  
42  
43  
44  
45  
46  
47  
48  
49  
50  
51  
52  
53  
54  
55  
56  
57  
58  
59  
60

For peer review only

### **Abstract**

**Objectives:** The aim of this study was to explore the prognostic value of ki67 as a marker in non-muscle-invasive bladder cancer (NMIBC) patients treated with Bacillus Calmette–Guérin (BCG).

**Methods:** Studies were systematically retrieved from the relevant databases (Web of Science, PubMed, Cochrane Library, and Embase), and the expiry date was May 2017. The research steps referred to the Preferred Reporting Items for Systematic Reviews and Meta-Analysis statement.

**Results:** A total of 11 studies that complied with the inclusion criteria were enrolled. The expression of ki67 was not statistically significantly correlated with recurrence-free survival (RFS) [hazard ratio (HR): 1.331; 95% CI: 0.980–1.809]. No significant heterogeneity was found among all included studies ( $I^2 = 36.7\%$ ,  $P = 0.148$ ). The expression of ki67 was statistically significantly correlated with progression-free survival (PFS) (HR: 2.567; 95% CI: 1.562–4.219), and the overexpression of ki67 was the risk factor for PFS. Significant heterogeneity was noted among all the included studies ( $I^2 = 55.6\%$ ,  $P = 0.021$ ). The studies that might cause heterogeneity were excluded using the Galbraith plot, and then the meta-analysis was performed again. The results showed that the expression of ki67 was still correlated with PFS (HR: 2.922; 95% CI: 2.002–4.266).

**Conclusions:** The overexpression of ki67 was the risk factor for PFS, and the relationship between the expression of ki67 and RFS was not statistically significant in patients with NMIBC treated with BCG intravesical immunotherapy. Well-designed, prospective, randomized controlled trials with a large sample size are still needed to validate these findings.

**Key words:** ki67; meta-analysis; non-muscular-invasive bladder cancer; prognosis

### ***Strengths and limitations of this study***

This meta-analysis and systematic review was performed via a strict literature search.

It was the first meta-analysis to evaluate the prognostic value of ki67 in patients with NMIBC after transurethral resection and BCG intravesical immunotherapy.

The number of studies considered in the final meta-analysis was 11. This small sample size limited the potential analyses. The research did not consider the surgical skills mentioned in published studies.

Despite a systematic search strategy, the inclusion criteria excluded non-English documents and had language bias. The meta-regression analysis suggested no bias, but a selection bias was likely.

These limitations notwithstanding, the research can guide the follow-up research on immunohistochemical markers and clinical practice in non-muscular-invasive bladder cancer.

### ***Introduction***

Bladder cancer is one of the most common clinical urological tumors. It is a direct threat to the survival of patients with the disease. The incidence of bladder cancer varies across the world, with the highest rate in the developed communities.<sup>1</sup> A total of 429,800 new cases of bladder cancer and 165,100 deaths occurred in 2012 worldwide. Bladder cancer occurs mostly in men, and about a tenfold variation in incidence rates has in been reported internationally.<sup>2</sup> About 70% of these patients have non-muscle-invasive bladder cancer (NMIBC).<sup>3</sup> Four major organizational guidelines on NMIBC, including the American Urological Association/Society of Urologic Oncology, the European Association of Urology, the National Comprehensive Cancer

1  
2  
3 Network, and the National Institute for Health and Care Excellence guidelines,  
4 recommend that the proper initial transurethral resection (TUR) of bladder tumor is a  
5 critical step in the initial management and staging of the disease.<sup>4</sup> However, TUR  
6 surgery alone cannot solve the postoperative problems for NMIBC because of high  
7 recurrence rate and disease development.<sup>5</sup> Postoperative TUR associated with  
8 Bacillus Calmette–Guérin (BCG) intravesical immunotherapy can prevent the  
9 postoperative recurrence of NMIBC and significantly reduce the moderate and high  
10 development risk of NMIBC.<sup>6, 7</sup> However, the postoperative BCG intravesical  
11 immunotherapy still has some problems. The failure rate of BCG intravesical therapy  
12 in NMIBC is about 40%–50%.<sup>8</sup> Furthermore, BCG also has toxic side effects, such as  
13 hepatitis, pneumonitis, epididymitis/orchitis, abscess formation, bladder contracture,  
14 ureteral obstruction, BCG sepsis, leukopenia, and hematuria.<sup>9</sup> Therefore, BCG  
15 therapy should be individually performed, and the patients in whom BCG therapy is  
16 ineffective should be timely recognized. These patients or those with poor prognosis  
17 should receive radical cystectomy or any other therapy in time to avoid futile  
18 treatment and alleviate pain. However, the recognition of patients with no effect of  
19 TUR postoperative BCG intravesical immunotherapy is still hard due to the  
20 heterogeneity of bladder cancer and individuality of patients.<sup>10</sup> Therefore, finding the  
21 prognostic factors for patients with NMIBC receiving TUR and BCG therapy is  
22 extremely necessary.

23  
24  
25  
26  
27  
28  
29  
30  
31  
32  
33  
34  
35  
36  
37  
38  
39  
40  
41  
42  
43  
44  
45  
46 The recurrence rate of bladder cancer treated with different therapies is between 50%  
47 and 80%, and about 15% of the low-grade tumor recurrence involves high-grade  
48 tumors.<sup>11</sup> The patients need periodical cystoscopy to find the recurrent focus in time.  
49  
50  
51  
52 A reliable prognostic molecular marker can reduce the pain caused by cystoscopy.  
53  
54  
55 Because NMIBC does not have reliable prognostic markers, it is hard to decide

1  
2  
3 postoperative therapy in the clinic,<sup>12</sup> which depends mainly on the clinical guidelines  
4 and physician's experience. Currently, some of the published studies about  
5 immunohistochemical markers have evaluated the prognostic value of BCG  
6 intravesical immunotherapy on the patients first receiving TUR. The main  
7 immunohistochemical markers include ki67, p53, p27, pRb, CD9, CD20, E2F1, and  
8 so forth.<sup>13, 14</sup> However, no immunohistochemical marker has been confirmed so far.  
9  
10 The prognostic value of ki67 antigen on the survival in patients with NMIBC  
11 receiving BCG intravesical immunotherapy has been controversial. For example,  
12 Kruger.<sup>15</sup> reported that ki67 antigen was an independent predictive factor for the  
13 recurrence of pT1 stage tumor, but Oderde<sup>16</sup> believed that ki67 was an independent  
14 predictive factor for the recurrence of all NMIBCs. Zlotta<sup>17</sup> reported that ki67 antigen  
15 had no independent prognostic value in patients receiving BCG therapy. Saint<sup>18</sup>  
16 retrospectively reviewed the recent 25-year published studies and believed that the independent  
17 prognostic factor for bladder cancer in patients receiving BCG therapy was not clear.  
18  
19 An international consensus group listed various bladder cancer prognostic indexes by  
20 reviewing PubMed and considered that although some markers (such as ki67 and p53)  
21 could predict the recurrence and development of bladder cancer, the data still had  
22 heterogeneity. Thus, strict test criteria and clear statistical methods should be  
23 established for further evaluation.<sup>19</sup>

24  
25  
26  
27  
28  
29  
30  
31  
32  
33  
34  
35  
36  
37  
38  
39  
40  
41  
42  
43  
44 A meta-analysis can enlarge the sample size by integrating independent studies with  
45 small sample size, further increase the statistical efficacy, and reduce the wrong  
46 conclusion caused by the small sample size.<sup>20</sup> The aim of this study was to explore the  
47 prognostic value of ki67 as a marker in patients with NMIBC treated with BCG.  
48  
49 Based on the literature search, this study was the first meta-analysis to evaluate the  
50 prognostic value of ki67 in patients with NMIBC treated with BCG.  
51  
52  
53  
54  
55

## ***Methods***

This meta-analysis was performed according to the Preferred Reporting Items for Systematic Reviews and Meta-Analyses (PRISMA) statement (**Table S1**).<sup>21</sup> The present meta-analysis did not need the approval because all the enrolled published studies were approved by the ethics committee in their research institute.

### ***Literature retrieval strategy***

The comprehensive literature search was performed on Web of Science, PubMed, Cochrane Library, and Embase databases for relevant studies. The last quest was updated on May 24, 2017, with hand-searching to identify any potentially eligible studies that might have been missed. The following search strategy was adopted for each database: ("Urinary Bladder Neoplasms"[Mesh] OR "bladder cancer" OR "bladder carcinoma" OR " bladder tumor ") AND ("BCG Vaccine"[Mesh] OR "BCG" OR "Bacillus Calmette–Guérin") AND ("ki67 antigen "[Mesh] OR " ki-67" OR " ki67" OR " MBI-1"). Filters were as follows: retrospective, array research, clinical trial, controlled clinical trial, and randomized controlled trial. Free word retrieval strategy was used. The enrolled contents included the reference lists and relevant suggestive references while searching.

### ***Inclusion and exclusion criteria***

The inclusion criteria were as follows: (1) prospective or retrospective published studies evaluating the prognostic relationship between the expression of ki67 and NMIBC treated with BCG; (2) the expression of ki67 in tissues detected by immunohistochemistry analysis; (3) hazard ratio (HR) and 95% confidence interval (95% CI) directly obtained from the published studies; and (4) published English studies. The exclusion criteria were as follows: (1) review, systematic evaluation, case



1  
2  
3 report, editorial, and specialist experience; (2) studies with no human subjects; and (3)  
4  
5 published studies in which data could not be extracted or those having wrong data.  
6

### 7 ***Data extraction and evaluation of literature quality***

8  
9 Based on the aforementioned criteria, two reviewers independently screened the  
10  
11 published studies by reading titles and abstracts and got preliminary conclusions. If  
12  
13 the conclusions were not consistent, the literature was discussed by all the authors to  
14  
15 decide its enrollment. The relevant information of the enrolled published studies was  
16  
17 extracted, such as first author, publication time, research country, sex, case number,  
18  
19 age, follow-up date, disease stage, cutoff values, recurrence-free survival (RFS), and  
20  
21 progression-free survival (PFS). The Newcastle–Ottawa Scale (NOS) was used to  
22  
23 evaluate the quality of all the published studies.<sup>22</sup> Scores 0–3, 4–5, and 6–8 were  
24  
25 accepted as low, medium, and high quality, respectively.  
26  
27

### 28 ***Statistical methods***

29  
30 The measuring time and method of ki67 complied with the standard of clinical routine  
31  
32 and pathological examination. Tumor tissue samples were taken in accordance with  
33  
34 the standard surgical procedure and used for immunohistochemical analysis. RFS and  
35  
36 PFS were the traditionally used statistical parameters. PFS was defined as the time  
37  
38 from the beginning of treatment to the first progression. RFS was defined as the time  
39  
40 from the removal of the lesion (or the randomization of the clinical trial) until the  
41  
42 recurrence or death of the tumor. The impact of the expression of ki67 on survival was  
43  
44 quantified using the combined HRs and 95% CIs. The HR and 95% CI of each study  
45  
46 were directly extracted from each original published study. Besides, the Parmar and  
47  
48 Tierney's<sup>23</sup> method was used to extract the data because some of the published studies  
49  
50 did not directly provide HR and 95% CI. For example, some studies provided only the  
51  
52 survival curve. In this meta-analysis, the DerSimonian–Laird random-effects model<sup>24</sup>  
53  
54  
55  
56

1  
2  
3 was used because when the heterogeneity was large, only the random-effects model  
4 could be suitably used. Similar to traditional methods, HR >1 was considered as the  
5 prognostic risk factor for the overexpression of ki67, and HR <1 was a protective  
6 factor. 95% CI <1 indicated a statistically significant difference in the relationship  
7 between the overexpression of ki67 and prognosis.  
8

9  
10  
11 The heterogeneity was calculated according to chi-square-based Q test and  $I^2$   
12 statistic.<sup>25</sup> The heterogeneity was judged using the  $I^2$  value (low heterogeneity:  $I^2$   
13 <25%; moderate heterogeneity:  $I^2 = 25\%–50\%$ ; large heterogeneity:  $I^2 >50\%$ ).  
14 Besides, A  $P$  value >0.05 was considered as low heterogeneity. Then, the subgroup  
15 analysis based on regions, sample size, follow-up period, tumor grading, cutoff value,  
16 publication time, and patient age was performed. A value of 1% was considered to be  
17 a statistically significant level in the subgroup analysis. A Galbraith plot was used to  
18 search published studies with heterogeneity<sup>26</sup>, and the meta-analysis was performed  
19 again after excluding these published studies. Meanwhile, the factors causing  
20 heterogeneity were also explored using the residual maximum likelihood  
21 (REML)-based random-effects meta-regression analysis.<sup>27</sup> All the statistical analyses  
22 were performed using the Stata12.0 software (StataCorp, TX, USA), and the  
23 two-sided test was used to evaluate the  $P$  value.  
24  
25  
26  
27  
28  
29  
30  
31  
32  
33  
34  
35  
36  
37  
38  
39  
40

#### 41 ***Evaluation of publication bias***

42 Begg's plot and Egger's test method were used to find the possible publication bias. A  
43  
44  
45  
46  $P$  value <0.05 was considered to indicate publication bias.  
47  
48  
49

#### 50 ***Results***

##### 51 ***Literature screening***

52  
53  
54 A total of 97 published studies were retrieved. Furthermore, 68 of them were excluded  
55  
56

1  
2  
3 after duplicates were removed and records screened, and 18 were excluded after  
4 reading the full text (10 published studies from which HR and 95% CI could not be  
5 obtained, 2 non-English studies, and 6 that did not use ki67 detection). Finally, 11  
6  
7 published studies were enrolled in the meta-analysis (**Figure 1**).  
8  
9

### 10 11 *Basic characteristics and quality evaluation of enrolled published studies*

12  
13 The enrolled 11 published studies were published between 1997 and 2013, and the  
14 countries included Italy, South Korea, Spain, Germany, New Zealand, Canada,  
15 Portugal, and France. The largest sample size was 309, and the smallest one was 32. A  
16 total of 1321 patients were enrolled in this study. The follow-up period was beyond 36  
17 months, and the longest was 229 months. T1 was the main tumor grading, and the  
18 cutoff value ranged from 10.4% to 40%. Seven published studies reported patients'  
19 RFS, and nine reported PFS (**Table 1**). One literature was scored as 6 star by NOS,  
20 seven as 7 star, and three as 8 star. The median of the NOS score was 7 (**Table 2**).  
21  
22  
23  
24  
25  
26  
27  
28  
29  
30  
31  
32  
33  
34  
35  
36  
37  
38  
39  
40  
41  
42  
43  
44  
45  
46  
47  
48  
49  
50  
51  
52  
53  
54  
55  
56  
57  
58  
59  
60

**Table 1.** Main characteristics of all studies included in this meta-analysis

| Study                         | Year | Country             | Male/Female | No. of patients | Age (year)     | Follow-up (month) | Stage     | Cutoff | Survival analysis |
|-------------------------------|------|---------------------|-------------|-----------------|----------------|-------------------|-----------|--------|-------------------|
| Oderda <sup>16</sup>          | 2013 | Italy               | 166/26      | 192             | 73.2 (SD 11.9) | 100 (2–229)       | All NMIBC | 20%    | RFS               |
| Park <sup>14</sup>            | 2013 | Korea               | 53/8        | 61              | 66 (31–85)     | 60 (6–217)        | T1G3      | 10.4%  | RFS/PFS           |
| Quintero <sup>28</sup>        | 2013 | Spain               | 143/21      | 164             | 61 (29–93)     | 75 (60–144)       | Ta        | 13%    | PFS               |
| Bertz <sup>12</sup>           | 2012 | Germany             | 237/72      | 309             | 71.7 (38–87)   | 49 (5–172)        | pT1       | 15%    | RFS/PFS           |
| van Rhijn <sup>29</sup>       | 2012 | Netherlands, Canada | 105/24      | 129             | 68.8 (SD 9.9)  | 78 (39.6–110.4)   | T1        | 25%    | RFS/PFS           |
| Burger <sup>30</sup>          | 2007 | Germany             | 45/21       | 71              | 71 (52–94)     | 39 (1–133)        | T1/Ta     | 15%    | RFS               |
| Queipo-zaragoza <sup>31</sup> | 2007 | Spain               | 71/12       | 83              | 68.1 (SD 8.5)  | All >36           | T1G3      | 40%    | PFS               |
| Lopez-Beltran <sup>32</sup>   | 2004 | Spain               | 49/2        | 51              | 69.96 (49–89)  | 63.82 (60–144)    | T1G3      | 13%    | PFS               |
| Santos <sup>33</sup>          | 2003 | Portugal            | 115/44      | 159             | 66 (21–88)     | 46.5 (4–123)      | pTa/pT1   | 18%    | RFS/PFS           |
| Blanchet <sup>34</sup>        | 2001 | France              | -           | 70              | 62.6 (21–84)   | 64 (12–111)       | pT1/pTa   | 13%    | PFS               |
| Lee <sup>35</sup>             | 1997 | Korea               | 28/4        | 32              | 57.1 (30–81)   | All >24           | T1G2-3    | 20%    | RFS               |

NMIBC, Non-muscle-invasive bladder cancer; no., number; PFS, progression-free survival; RFS, recurrence-free survival.

**Table 2.** Quality of the included studies assessed by NOS

| Study                         | Selection                    |                             | Comparability         |                        | Exposure                     |                           | Non-response rate | Scores |                                                 |
|-------------------------------|------------------------------|-----------------------------|-----------------------|------------------------|------------------------------|---------------------------|-------------------|--------|-------------------------------------------------|
|                               | Adequate definition of cases | Representativeness of cases | Selection of controls | Definition of controls | Control for important factor | Ascertainment of exposure |                   |        | Same method to ascertain for cases and controls |
| Oderda <sup>16</sup>          | —                            | ☆                           | ☆                     | ☆                      | ☆☆                           | ☆                         | ☆                 | ☆      | 8                                               |
| Park <sup>14</sup>            | —                            | ☆                           | ☆                     | —                      | ☆☆                           | ☆                         | ☆                 | ☆      | 7                                               |
| Quintero <sup>28</sup>        | —                            | ☆                           | ☆                     | —                      | ☆☆                           | ☆                         | ☆                 | —      | 6                                               |
| Bertz <sup>12</sup>           | —                            | ☆                           | ☆                     | —                      | ☆☆                           | ☆                         | ☆                 | ☆      | 7                                               |
| van Rhijn <sup>29</sup>       | —                            | ☆                           | ☆                     | —                      | ☆☆                           | ☆                         | ☆                 | ☆      | 7                                               |
| Burger <sup>30</sup>          | ☆                            | ☆                           | ☆                     | —                      | ☆☆                           | ☆                         | ☆                 | —      | 7                                               |
| Queipo-zaragoza <sup>31</sup> | —                            | ☆                           | ☆                     | —                      | ☆☆                           | ☆                         | ☆                 | ☆      | 7                                               |
| Lopez-Beltran <sup>32</sup>   | —                            | ☆                           | ☆                     | ☆                      | ☆☆                           | ☆                         | ☆                 | ☆      | 8                                               |
| Santos <sup>33</sup>          | —                            | ☆                           | ☆                     | —                      | ☆☆                           | ☆                         | ☆                 | ☆      | 7                                               |
| Blanchet <sup>34</sup>        | —                            | ☆                           | ☆                     | ☆                      | ☆☆                           | ☆                         | ☆                 | ☆      | 8                                               |
| Lee <sup>35</sup>             | —                            | ☆                           | ☆                     | —                      | ☆☆                           | ☆                         | ☆                 | ☆      | 7                                               |

### ***Influence of the expression of ki67 on RFS***

Seven published studies reported the expression of ki67 and PFS results of patients with NMIBC treated with BCG. The meta-analysis indicated that ki67 had no statistically significant association with RFS (HR: 1.331; 95% CI: 0.980–1.809), and no heterogeneity among the enrolled studies was reported ( $I^2 = 36.7\%$ ,  $P = 0.148$ ) (**Figure 2A**). The subgroup analysis was performed based on the regions, sample size, follow-up period, stage, cutoff value, publication time, and age. Meanwhile, all the original published studies on the correlation between ki67 expression and RFS in patients with NMIBC treated with BCG were multivariate, and the HRs were adjusted. The stratification analysis by region indicated that ki67 was also significantly associated with RFS in Caucasians and a follow-up period shorter than 6 months. (HR: 1.441, 95% CI: 1.014–2.047; HR: 1.853, 95% CI: 1.316–2.607) (**Table 3**).

**Table 3.** Subgroup results of RFS and heterogeneity test

| Variables          | Study number | HR (95% CI)         | Heterogeneity test |          |                           |
|--------------------|--------------|---------------------|--------------------|----------|---------------------------|
|                    |              |                     | <i>Q</i>           | <i>P</i> | <i>I</i> <sup>2</sup> (%) |
| Total RFS          | 7            | 1.331 (0.980–1.809) | 9.48               | 0.148    | 36.7                      |
| Region             |              |                     |                    |          |                           |
| Asian              | 2            | 0.892 (0.454–1.752) | 0.32               | 0.570    | 0.0                       |
| Caucasian          | 5            | 1.441 (1.014–2.047) | 7.52               | 0.111    | 46.8                      |
| Sample size        |              |                     |                    |          |                           |
| >100               | 4            | 1.466 (0.986–2.181) | 7.44               | 0.059    | 59.7                      |
| ≤100               | 3            | 0.959 (0.534–1.725) | 0.51               | 0.777    | 0.0                       |
| Follow-up (month)  |              |                     |                    |          |                           |
| ≥60                | 3            | 1.036 (0.758–1.415) | 0.79               | 0.674    | 0.0                       |
| <60                | 4            | 1.853 (1.316–2.607) | 2.62               | 0.453    | 0.0                       |
| Stage              |              |                     |                    |          |                           |
| All NMIBC          | 3            | 1.575 (0.915–2.711) | 4.44               | 0.109    | 54.9                      |
| Others             | 4            | 1.153 (0.821–1.620) | 3.21               | 0.360    | 6.6                       |
| Cutoff             |              |                     |                    |          |                           |
| 15%                | 2            | 1.625 (0.963–2.743) | 0.31               | 0.575    | 0.0                       |
| Others             | 5            | 1.252 (0.839–1.869) | 8.56               | 0.073    | 53.3                      |
| Publication year   |              |                     |                    |          |                           |
| ≥2012              | 4            | 1.164 (0.874,1.550) | 3.20               | 0.362    | 6.3                       |
| <2012              | 3            | 1.774 (1.046,3.008) | 2.57               | 0.277    | 22.1                      |
| Patient age (year) |              |                     |                    |          |                           |
| ≥70                | 3            | 1.352 (0.955–1.913) | 1.16               | 0.559    | 0.0                       |
| <70                | 4            | 1.256 (0.717–2.198) | 8.32               | 0.040    | 63.9                      |

NMIBC, Non-muscle-invasive bladder cancer; RFS, recurrence-free survival.

### ***Influence of the expression of ki67 on PFS***

A total of nine published studies reported the expression of ki67 and PFS results of patients in NMIBC treated with BCG. The meta-analysis indicated that ki67 had no statistically significant association with RFS (HR:2.567, 95% CI: 1.562–4.219), and the overexpression of ki67 was the risk factor for PFS. Statistically significant heterogeneity was found among all the included studies ( $I^2 = 55.6\%$ ,  $P = 0.021$ ) (**Figure 2B**). The subgroup analysis was performed based on the regions, sample size, follow-up period, stage, cutoff value, publication time, and age. However, the data extracted from six original published studies on the correlation between the expression of p53 and PFS in patients with NMIBC treated with BCG were multivariate with adjusted HRs, whereas three original published studies were univariate with unadjusted HRs. In the stratified analyses by the region, sample size, follow-up time, stage, cutoff, publication year, and patient age, significant associations were observed in the studies with Caucasian subgroup, sample size >100, follow-up period <6 months, other cutoffs, and two subgroups based on age (HR: 1.97, 95% CI: 1.04–3.74; HR: 2.37, 95% CI: 1.23–4.55; HR:2.49, 95% CI: 1.19–5.21; HR: 2.515, 95% CI: 1.382–4.576; HR: 2.800, 95% CI: 1.447–5.418; and HR: 2.654, 95% CI: 1.381–5.100, respectively). However, significant associations were also observed in both multivariate and univariate analyses (HR: 2.10, 95% CI: 1.07–1.12; HR: 2.80, 95%CI: 1.65–7.85, respectively), and the effect size suggested the same outcomes (HR: 2.567, 95% CI: 1.562–4.219) (**Table 4**).



**Table 4.** Subgroup results of PFS and heterogeneity test

| Variables               | Study number | HR (95% CI)           | Heterogeneity test |          |                           |
|-------------------------|--------------|-----------------------|--------------------|----------|---------------------------|
|                         |              |                       | <i>Q</i>           | <i>P</i> | <i>I</i> <sup>2</sup> (%) |
| Total PFS               | 9            | 2.567 (1.562–4.219)   | 18.1               | 0.021    | 55.6                      |
| Region                  |              |                       |                    |          |                           |
| Asian                   | 1            | 0.421 (0.084–2.114)   | 0.00               |          |                           |
| Caucasian               | 8            | 2.883 (1.830–4.544)   | 12.99              | 0.072    | 46.1                      |
| Sample size             |              |                       |                    |          |                           |
| >100                    | 5            | 2.559 (1.372–4.774)   | 9.26               | 0.055    | 56.8                      |
| ≤100                    | 4            | 2.536 (0.943–6.818)   | 8.75               | 0.033    | 65.7                      |
| Follow-up (month)       |              |                       |                    |          |                           |
| ≥60                     | 6            | 2.153 (0.984–4.710)   | 13.08              | 0.023    | 61.8                      |
| <60                     | 3            | 3.158 (1.774–5.623)   | 3.56               | 0.169    | 43.8                      |
| Stage                   |              |                       |                    |          |                           |
| All NMIBC               | 3            | 4.673 (1.938–11.264)  | 3.29               | 0.193    | 39.2                      |
| Others                  | 6            | 2.044 (1.213–15.040)  | 9.58               | 0.088    | 47.8                      |
| Cut off                 |              |                       |                    |          |                           |
| 15%                     | 1            | 2.800 (1.447–5.418)   | 0.00               |          |                           |
| Others                  | 8            | 2.515 (1.382–4.576)   | 17.92              | 0.012    | 60.9                      |
| Publication year        |              |                       |                    |          |                           |
| ≥2012                   | 5            | 1.685 ( 0.883,3.215 ) | 8.04               | 0.090    | 50.2                      |
| <2012                   | 4            | 4.176 ( 2.209,7.884 ) | 5.00               | 0.172    | 40.0                      |
| Patient age (year)      |              |                       |                    |          |                           |
| ≥70                     | 2            | 2.519 (1.377–4.606)   | 0.60               | 0.438    | 0.0                       |
| <70                     | 7            | 2.654 (1.381–5.100)   | 17.40              | 0.008    | 65.5                      |
| Multivariate/Univariate |              |                       |                    |          |                           |
| Multivariate            | 6            | 2.101 (1.070–1.121)   | 13.83              | 0.031    | 63.8                      |
| Univariate              | 3            | 2.803 (1.652–7.856)   | 3.38               | 0.001    | 40.8                      |

1  
2  
3  
4  
5  
6  
7  
8  
9  
10  
11  
12  
13  
14  
15  
16  
17  
18  
19  
20  
21  
22  
23  
24  
25  
26  
27  
28  
29  
30  
31  
32  
33  
34  
35  
36  
37  
38  
39  
40  
41  
42  
43  
44  
45  
46  
47

NMIBC, Non-muscle-invasive bladder cancer; PFS, progression-free survival.

For peer review only

### ***Galbraith plot***

Using Galbraith plot (**Figure 3A**), it was found that Santos<sup>33</sup> was the main reason for the heterogeneity of RFS. After the aforementioned study was excluded, the remaining RFS studies had no significant heterogeneity according to the new meta-analysis ( $I^2 = 0.0\%$ ,  $P = 0.667$ ). However, the expression of ki67 still had no statistically significant association with RFS (HR: 1.161, 95% CI: 0.896–1.504) (**Figure S1**). Using the Galbraith plot (**Figure 3B**), it was found that Santos,<sup>33</sup> Park,<sup>14</sup> and van Rhijn<sup>29</sup> were the main reason for the heterogeneity of PFS. After these studies were excluded, the remaining RFS studies had no significant heterogeneity according to the new meta-analysis ( $I^2 = 0.0\%$ ,  $P = 0.497$ ). The expression of ki67 still had statistically significant association with PFS (HR: 2.922, 95% CI: 2.002–4.266) (**Figure S2**).

### ***Meta-regression analysis***

The meta-regression analysis indicated that the factors influencing heterogeneity (publication time, research region, sample size, stage, cutoff value, age, and follow-up period) might not be the reason for RFS heterogeneity. Publication time was the reason for heterogeneity of PFS ( $P = 0.036$ ), but other factors were not (**Table S2**).

### ***Publication bias***

The funnel plot (**Figure 4A**) was basically symmetrical for RFS. The results of Begg's test and Egger's test showed  $P$  (Begg's) = 0.761,  $P$  (Egger's) = 0.601. The funnel plot (**Figure 4B**) was also basically symmetrical for PFS. The results of Begg's test and Egger's test showed  $P$  (Begg's) = 0.917,  $P$  (Egger's) = 0.964.

### ***Discussion***

A total of 11 published studies with 1321 cases complying with the inclusion criteria

1  
2  
3 were enrolled in this meta-analysis. The results of the meta-analysis indicated that the  
4  
5 expression of ki67 had no statistically significant association with RFS, but it was  
6  
7 significantly correlated with PFS. The overexpression of ki67 was the risk factor for  
8  
9 PFS. It suggested that ki67 was the prognostic predictive marker in patients with  
10  
11 NMIBC treated with BCG. Besides, the aforementioned conditions did not change  
12  
13 after excluding the published studies possibly causing heterogeneity and reperforming  
14  
15 the meta-analysis. It further proved that the result of the aforementioned meta-analysis  
16  
17 was stable, that is, the overexpression of ki67 was the risk factor for PFS. In the  
18  
19 Caucasian subgroup for PFS, racial classification and regional factors might be crucial  
20  
21 in the prognosis of patients with NMIBC after BCG therapy. This may be related to  
22  
23 the existence of different drug gene susceptibilities in people of different races and  
24  
25 living areas. The two subgroups based on age in PFS, suggesting that age might be the  
26  
27 important factor influencing the prognosis of bladder cancer. This also comply to our  
28  
29 clinical practice. The elder the patient, the worse the prognosis. There are several  
30  
31 sources of heterogeneity in the above-mentioned subgroup analysis: (1) Due to the  
32  
33 influence of race and environment, the documents included in this article come from  
34  
35 different regions and countries. There are a large number of studies that confirm the  
36  
37 differences in disease susceptibility between ethnic groups and regions. (2) Because  
38  
39 of different regions and different clinicians, in the TUR and BGC perfusion treatment,  
40  
41 there are differences in the operation of health care workers. Such as surgical  
42  
43 clearance of the tumor. The tumor with a broad base surface is often not easy to  
44  
45 remove completely, which also depends on the surgeon's experience and surgical  
46  
47 skills. And the quality of BCG manufacturers may vary from region to region. (3)  
48  
49 Different researchers' literature may include the bias of research object, research  
50  
51 design, measuring instrument and so on. However, in general, heterogeneity does not  
52  
53  
54  
55  
56

1  
2  
3 affect the conclusion. Besides, the meta-regression analysis indicated publication time  
4 as the reason for PFS heterogeneity. We consider it is relate to the improvement of  
5 testing technology, research level as well as the quality and quantity of published  
6 articles, which will be helpful for the follow-up researches. As all the original data  
7 extracted from published studies on the correlation between the expression of ki67  
8 and RFS in patients with NMIBC treated with BCG were multivariate, the result was  
9 considered to be precise because the HRs were adjusted, excluding the confounding  
10 factors such as age and gender. However, the original data extracted from published  
11 studies on the correlation between ki67 expression and PFS were both multivariate  
12 and univariate. It was believed that the aforementioned adjustments did not have a  
13 significant impact on meta-analyses. Besides, according to the funnel plot, Begg's test  
14 and Egger's test, the enrolled studies had no statistically significant publication bias.  
15 Thus, the reliability of the present meta-analysis was high.

16  
17  
18 In 2016, the European Association of Urology (EUA)<sup>36</sup> recommended a scoring  
19 system for the prognostic evaluation of NMIBC based on six clinical and pathological  
20 factors proposed by the European Organization for the Research and Treatment of  
21 Cancer-Genito-Urinary Cancer Group (EORTC), including number of tumors, tumor  
22 size, prior recurrence rate, T category, presence of concurrent carcinoma in situ, and  
23 tumor grade (**Table S3**). The tumors were categorized into low-risk tumors,  
24 intermediate-risk tumors, and high-risk tumors using this assessment system to  
25 evaluate the prognosis. For the patients after BCG therapy, the EUA recommended  
26 another risk calculator developed by the Club Urologico Espanol de Tratamiento  
27 Oncologico (CUETO) and the EORTC. This calculator was based on gender, age,  
28 recurrent tumor, number of tumors, T category, associated Tis, and grade. The  
29 CUETO risk calculator can be achieved at <http://www.aeu.es/Cueto.html>. The

1  
2  
3 recommended level was B grade for the two scales for patients with NMIBC, whether  
4 used alone or combined. The two scales could be used together in the clinic. When  
5 using the CUETO scale, the calculated recurrent risk was lower than that from the  
6 EORTC scale,<sup>37</sup> which might be related to the special design in the CUETO scale for  
7 the patients receiving BCG intravesical immunotherapy. However, the scoring system  
8 only depending on clinical and pathological factors could not accurately evaluate the  
9 prognosis of patients with bladder cancer in T1 stage due to the independence of  
10 disease condition in each patient.<sup>38</sup> The markers regulated at the genetic level may  
11 judge the prognosis of patients with bladder cancer with the development of precision  
12 medicine. A reliable marker helps in recognizing the patients who have failed in BCG  
13 intravesical immunotherapy with high risk in time. Hence, these patients can undergo  
14 radical cystectomy or other treatments in time. Unfortunately, no prognostic marker  
15 has been applied in clinic currently. The results of this study potentially help to  
16 remind clinicians that patients with high expression of ki67 may need to develop more  
17 personalized follow-up plans, such as shorter follow-up and cystoscopy cycles. For  
18 patients with high risk of clinical evaluation of the guidelines and ki67 overexpression  
19 may need to promptly change the treatment strategy.

20  
21  
22  
23  
24  
25  
26  
27  
28  
29  
30  
31  
32  
33  
34  
35  
36  
37  
38  
39 Ki67 is a nucleoprotein that can be detected in the cell cycles except G0 phase.<sup>39</sup> The  
40 expression of human ki67 protein is closely related to proliferation. Therefore, it is an  
41 ideal marker to confirm the growth fraction of specific cell colonies.<sup>40</sup> Ki67 is a  
42 widely known amplified biomarker. The ki67 monoclonal antibody can be detected by  
43 the immunohistochemical method.<sup>41</sup> Ki67 has been proved to be a good proliferation  
44 marker in different cancers, including bladder cancer.<sup>42</sup>

45  
46  
47  
48  
49  
50  
51  
52 So far, some meta-analyses have studied the effect of ki67 on the prognostic quality of  
53 life of patients with esophageal cancer, breast cancer, epithelial ovarian cancer, and so  
54

1  
2  
3 on.<sup>43-45</sup> Some studies have also focused on the other aspects of bladder cancer. Using  
4 meta-analysis, Luo<sup>46</sup> believed that a high reactivity of ki67 could predict the poor  
5 prognosis in patients with bladder cancer. The univariate analysis showed that  
6 cancer-specific survival, disease-free survival, overall survival, PFS, and RFS had a  
7 significant correlation with poor prognosis in patients with a high reactivity of ki67.  
8  
9 However, this study enrolled all types of bladder tumors and all the therapies for  
10 NMIBC. Currently, the bladder cancer treated in the clinic is mainly NMIBC. Thus,  
11 most of the applied therapy is TUR combined with installations of chemotherapy or  
12 BCG intravesical immunotherapy based on the patients' conditions. Therefore, this  
13 analysis had a certain limitation in the prognosis of patients with NMIBC after BCG  
14 intravesical immunotherapy.

15  
16  
17  
18  
19  
20  
21  
22  
23  
24  
25  
26  
27  
28  
29  
30  
31  
32  
33  
34  
35  
36  
37  
38  
39  
40  
41  
42  
43  
44  
45  
46  
47  
48  
49  
50  
51  
52  
53  
54  
55  
56  
57  
58  
59  
60  
Currently, few evidence-based studies focused on the prognosis of patients with  
NMIBC after BCG intravesical immunotherapy. Using meta-analysis, Zhou<sup>47</sup>  
analyzed the correlation between the expression of p53 and quality of life of patients  
with NMIBC after BCG intravesical immunotherapy. They believed that the  
overexpression of p53 in patients with NMIBC treated with BCG might be associated  
with RFS, especially in Asian population. Similarly, Du<sup>48</sup> also performed the  
meta-analysis on the relationship between p53 status and NMIBC in T1 stage and  
believed that the overexpression of p53 might be related to the development of  
NMIBC. The present study indicated that the overexpression of ki67 was the risk  
factor for PFS, but the expression of ki67 had no statistically significant association  
with RFS. P53 is the most common inactivated tumor suppressor gene in tumor  
cells.<sup>49</sup> The inactivation of p53 may cause cell abnormal hyperplasia and  
cancerization. The variation in p53 results in enhanced proliferation, invasion, and

1  
2  
3 metabolism.<sup>50</sup> The increase in the expression of ki67 , as cell proliferation marker  
4  
5  
6 suggests enhanced proliferation.<sup>40</sup> As a tumor suppressor gene with complicated  
7  
8 function, p53 has a wider range of effects. The accuracy in the prediction of quality of  
9  
10 life may not be more appropriate compared with ki67. The genetic difference between  
11  
12 Asians and Caucasians suggests that different prediction systems should be built for  
13  
14 different races. Besides, p27, E2F1, ezrin, and CK20 were also studied in other  
15  
16 investigations for predicting NMIBC prognosis, which could be explored further  
17  
18 comparing the advantages of using them alone or combined.  
19

20  
21 However, this study still had some limitations. First, the enrolled published studies  
22  
23 involved different populations, used similar detection equipment, and had different  
24  
25 cutoff values. All these reasons might have caused the heterogeneity. Further, the  
26  
27 sample size of the meta-analysis also limited its significance. Second, the  
28  
29 meta-analysis included English published studies. Although Begg's test and Egger's  
30  
31 test did not suggest publication bias, this study was still influenced by some bias.  
32  
33 Finally, the surgical skills were different in different published studies, affecting the  
34  
35 judgment regarding the effectiveness of BCG.  
36  
37

### 38 ***Conclusions***

39  
40 The overexpression of ki67 was the risk factor for PFS in patients with NMIBC after  
41  
42 TUR and BCG intravesical immunotherapy, but the relationship between the  
43  
44 expression of ki67 and RFS was not statistically significant. Owing to the  
45  
46 aforementioned limitations of the present study, RCTs with large sample size are still  
47  
48 required to validate the results.  
49  
50

### 51 ***Authors' contributions***



1  
2  
3 YHH, NW, and XFZ conceived and designed the experiments. XC and YSD extracted  
4 the data. YHH, NW, and XFZ analyzed the data. ZSD, JFW, and XC contributed  
5 reagents/materials/analysis tools. YHH and NW wrote the paper. XFZ critically  
6 revised the report.  
7  
8  
9

### 10 11 **Funding**

12  
13 This study was supported by grants from the International S&T Cooperation Program  
14 of China (ISTCP) (Grant No.2014DFE30010).  
15

### 16 17 **Disclaimer**

18  
19 The contents of the present study are solely the responsibility of the author. The  
20 funders had no role in study design, data collection and analysis, decision to publish,  
21 or preparation of the manuscript.  
22  
23  
24  
25

### 26 27 **Competing interests**

28  
29 None declared.  
30

### 31 32 **Data sharing statement**

33  
34 Datasets used and/or analyzed in the present study are available from the  
35 corresponding author on reasonable request.  
36  
37  
38

### 39 40 **References**

- 41  
42 1. Ploeg M, Aben KK, Kiemeny LA. The present and future burden of urinary  
43 bladder cancer in the world. *World J Urol* 2009;**27**:289-93.  
44 doi:10.1007/s00345-009-0383-3.  
45  
46  
47 2. Torre LA, Bray F, Siegel RL, *et al*. Global cancer statistics, 2012. *CA Cancer J Clin*  
48 2015;**65**:87-108. doi:10.3322/caac.21262.  
49  
50  
51 3. Ro JY, Staerkel GA, Ayala AG. Cytologic and histologic features of superficial  
52 bladder cancer. *Urol Clin North Am* 1992;**19**:435-53.  
53  
54  
55

- 1  
2  
3 4. Woldu SL, Bagrodia A, Lotan Y. Guideline of guidelines: non-muscle-invasive  
4  
5 bladder cancer. *BJU Int* 2017;**119**:371-80. doi:10.1111/bju.13760.  
6
- 7 5. Brausi M, Collette L, Kurth K, *et al.* Variability in the recurrence rate at first  
8  
9 follow-up cystoscopy after TUR in stage Ta T1 transitional cell carcinoma of the  
10  
11 bladder: a combined analysis of seven EORTC studies. *Eur Urol* 2002;**41**:523-31.  
12
- 13 6. Jarvinen R, Kaasinen E, Sankila A, *et al.* Long-term efficacy of maintenance  
14  
15 bacillus Calmette-Guerin versus maintenance mitomycin C instillation therapy in  
16  
17 frequently recurrent TaT1 tumours without carcinoma in situ: a subgroup analysis of  
18  
19 the prospective, randomised FinnBladder I study with a 20-year follow-up. *Eur Urol*  
20  
21 2009;**56**:260-5. doi:10.1016/j.eururo.2009.04.009.  
22
- 23 7. Sylvester RJ, Brausi MA, Kirkels WJ, *et al.* Long-term efficacy results of EORTC  
24  
25 genito-urinary group randomized phase 3 study 30911 comparing intravesical  
26  
27 instillations of epirubicin, bacillus Calmette-Guerin, and bacillus Calmette-Guerin  
28  
29 plus isoniazid in patients with intermediate- and high-risk stage Ta T1 urothelial  
30  
31 carcinoma of the bladder. *Eur Urol* 2010;**57**:766-73.  
32  
33 doi:10.1016/j.eururo.2009.12.024.  
34
- 35 8. Gual Frau J, Palou J, Rodriguez O, *et al.* Failure of Bacillus Calmette-Guerin  
36  
37 therapy in non-muscle-invasive bladder cancer: Definition and treatment options.  
38  
39 *Arch Esp Urol* 2016;**69**:423-33.  
40
- 41 9. Boyd LA. Intravesical Bacillus Calmette-Guerin for treating bladder cancer. *Urol*  
42  
43 *Nurs* 2003;**23**:189-91, 99; quiz 92.  
44
- 45 10. Alkhateeb SS, Neill M, Bar-Moshe S, *et al.* Long-term prognostic value of the  
46  
47 combination of EORTC risk group calculator and molecular markers in  
48  
49 non-muscle-invasive bladder cancer patients treated with intravesical Bacille  
50  
51 Calmette-Guerin. *Urol Ann* 2011;**3**:119-26. doi:10.4103/0974-7796.84954.  
52  
53  
54  
55

- 1  
2  
3 11. Mariappan P, Smith G. A surveillance schedule for G1Ta bladder cancer allowing  
4 efficient use of check cystoscopy and safe discharge at 5 years based on a 25-year  
5 prospective database. *J Urol* 2005;**173**:1108-11.  
6  
7 doi:10.1097/01.ju.0000149163.08521.69.  
8  
9  
10  
11 12. Bertz S, Otto W, Denzinger S, *et al.* Combination of CK20 and Ki-67  
12 immunostaining analysis predicts recurrence, progression, and cancer-specific  
13 survival in pT1 urothelial bladder cancer. *Eur Urol* 2014;**65**:218-26.  
14  
15 doi:10.1016/j.eururo.2012.05.033.  
16  
17  
18  
19 13. Kim K, Cho YM, Park BH, *et al.* Histological and immunohistochemical markers  
20 for progression prediction in transurethraly resected high-grade non-muscle invasive  
21 bladder cancer. *Int J Clin Exp Pathol* 2015;**8**:743-50.  
22  
23  
24  
25 14. Park J, Song C, Shin E, *et al.* Do molecular biomarkers have prognostic value in  
26 primary T1G3 bladder cancer treated with bacillus Calmette-Guerin intravesical  
27 therapy? *Urol Oncol* 2013;**31**:849-56. doi:10.1016/j.urolonc.2011.06.004.  
28  
29  
30  
31  
32 15. Kruger S, Thorns C, Stocker W, *et al.* Prognostic value of MCM2  
33 immunoreactivity in stage T1 transitional cell carcinoma of the bladder. *Eur Urol*  
34 2003;**43**:138-45.  
35  
36  
37  
38 16. Oderda M, Ricceri F, Pisano F, *et al.* Prognostic factors including Ki-67 and p53  
39 in Bacillus Calmette-Guerin-treated non-muscle-invasive bladder cancer: a  
40 prospective study. *Urol Int* 2013;**90**:184-90. doi:10.1159/000343431.  
41  
42  
43  
44  
45 17. Zlotta AR, Noel JC, Fayt I, *et al.* Correlation and prognostic significance of p53,  
46 p21WAF1/CIP1 and Ki-67 expression in patients with superficial bladder tumors  
47 treated with bacillus Calmette-Guerin intravesical therapy. *J Urol* 1999;**161**:792-8.  
48  
49  
50  
51 18. Saint F, Salomon L, Quintela R, *et al.* Do prognostic parameters of remission  
52 versus relapse after Bacillus Calmette-Guerin (BCG) immunotherapy exist?. analysis  
53  
54  
55  
56

- of a quarter century of literature. *Eur Urol* 2003;**43**:351-60; discussion 60-1.
19. Habuchi T, Marberger M, Droller MJ, *et al*. Prognostic markers for bladder cancer: International Consensus Panel on bladder tumor markers. *Urology* 2005;**66**:64-74. doi:10.1016/j.urology.2005.08.065.
20. Button KS, Ioannidis JP, Mokrysz C, *et al*. Power failure: why small sample size undermines the reliability of neuroscience. *Nat Rev Neurosci* 2013;**14**:365-76. doi:10.1038/nrn3475.
21. Liberati A, Altman DG, Tetzlaff J, *et al*. The PRISMA statement for reporting systematic reviews and meta-analyses of studies that evaluate health care interventions: explanation and elaboration. *PLoS Med* 2009;**6**:e1000100. doi:10.1371/journal.pmed.1000100.
22. Stang A. Critical evaluation of the Newcastle-Ottawa scale for the assessment of the quality of nonrandomized studies in meta-analyses. *Eur J Epidemiol* 2010;**25**:603-5. doi:10.1007/s10654-010-9491-z.
23. Parmar MK, Torri V, Stewart L. Extracting summary statistics to perform meta-analyses of the published literature for survival endpoints. *Stat Med* 1998;**17**:2815-34.
24. DerSimonian R, Laird N. Meta-analysis in clinical trials. *Control Clin Trials* 1986;**7**:177-88.
25. Higgins JP, Thompson SG. Quantifying heterogeneity in a meta-analysis. *Stat Med* 2002;**21**:1539-58. doi:10.1002/sim.1186.
26. Bax L, Ikeda N, Fukui N, *et al*. More than numbers: the power of graphs in meta-analysis. *Am J Epidemiol* 2009;**169**:249-55. doi:10.1093/aje/kwn340.
27. Xu X, Cheng Y, Li S, *et al*. Dietary carrot consumption and the risk of prostate cancer. *Eur J Nutr* 2014;**53**:1615-1623. doi: 10.1007/s00394-014-0667-2.

- 1  
2  
3 28. Quintero A, Alvarez-Kindelan J, Luque RJ, *et al.* Ki-67 MIB1 labelling index and  
4 the prognosis of primary TaT1 urothelial cell carcinoma of the bladder. *J Clin Pathol*  
5 2006;**59**:83-8. doi:10.1136/jcp.2004.022939.  
6  
7  
8  
9 29. van Rhijn BW, Liu L, Vis AN, *et al.* Prognostic value of molecular markers,  
10 sub-stage and European Organisation for the Research and Treatment of Cancer risk  
11 scores in primary T1 bladder cancer. *BJU Int* 2012;**110**:1169-76.  
12 doi:10.1111/j.1464-410X.2012.10996.x.  
13  
14  
15 30. Burger M, Denzinger S, Hartmann A, *et al.* Mcm2 predicts recurrence hazard in  
16 stage Ta/T1 bladder cancer more accurately than CK20, Ki67 and histological grade.  
17 *Br J Cancer* 2007;**96**:1711-5. doi:10.1038/sj.bjc.6603784.  
18  
19  
20 31. Queipo-Zaragoza JA, Ruiz-Cerda JL, Vera-Donoso CD, *et al.* Prognostic value of  
21 p53, Ki-67, microstaging and microvessel density in pT1G3 bladder tumors: creation  
22 of risk groups for progression. *Scand J Urol Nephrol* 2007;**41**:283-9.  
23 doi:10.1080/00365590601183055.  
24  
25  
26 32. Lopez-Beltran A, Luque RJ, Alvarez-Kindelan J, *et al.* Prognostic factors in stage  
27 T1 grade 3 bladder cancer survival: the role of G1-S modulators (p53, p21Waf1,  
28 p27kip1, Cyclin D1, and Cyclin D3) and proliferation index (ki67-MIB1). *Eur Urol*  
29 2004;**45**:606-12. doi:10.1016/j.eururo.2003.11.011.  
30  
31  
32 33. Santos L, Amaro T, Costa C, *et al.* Ki-67 index enhances the prognostic accuracy  
33 of the urothelial superficial bladder carcinoma risk group classification. *Int J Cancer*  
34 2003;**105**:267-72. doi:10.1002/ijc.11049.  
35  
36  
37 34. Blanchet P, Droupy S, Eschwege P, *et al.* Prospective evaluation of Ki-67 labeling  
38 in predicting the recurrence and progression of superficial bladder transitional cell  
39 carcinoma. *Eur Urol* 2001;**40**:169-75. doi:49768.  
40  
41  
42 35. Lee E, Park I, Lee C. Prognostic markers of intravesical bacillus Calmette-Guerin  
43  
44  
45  
46  
47  
48  
49  
50  
51  
52  
53  
54  
55  
56

- 1  
2  
3 therapy for multiple, high-grade, stage T1 bladder cancers. *Int J Urol* 1997;**4**:552-6.  
4  
5 36. Babjuk M, Bohle A, Burger M, *et al.* EAU Guidelines on Non-Muscle-invasive  
6  
7 Urothelial Carcinoma of the Bladder: Update 2016. *Eur Urol* 2017;**71**:447-61.  
8  
9 doi:10.1016/j.eururo.2016.05.041.  
10  
11 37. Fernandez-Gomez J, Madero R, Solsona E, *et al.* Predicting nonmuscle invasive  
12  
13 bladder cancer recurrence and progression in patients treated with bacillus  
14  
15 Calmette-Guerin: the CUETO scoring model. *J Urol* 2009;**182**:2195-203.  
16  
17 doi:10.1016/j.juro.2009.07.016.  
18  
19 38. Kiemeny LA, Witjes JA, Heijbroek RP, *et al.* Predictability of recurrent and  
20  
21 progressive disease in individual patients with primary superficial bladder cancer. *J*  
22  
23 *Urol* 1993;**150**:60-4.  
24  
25 39. Gerdes J, Lemke H, Baisch H, *et al.* Cell cycle analysis of a cell  
26  
27 proliferation-associated human nuclear antigen defined by the monoclonal antibody  
28  
29 Ki-67. *J Immunol* 1984;**133**:1710-5.  
30  
31 40. Scholzen T, Gerdes J. The Ki-67 protein: from the known and the unknown. *J Cell*  
32  
33 *Physiol* 2000;**182**:311-22.  
34  
35 doi:10.1002/(sici)1097-4652(200003)182:3<311::aid-jcp1>3.0.co;2-9.  
36  
37 41. Gerdes J, Li L, Schlueter C, *et al.* Immunobiochemical and molecular biologic  
38  
39 characterization of the cell proliferation-associated nuclear antigen that is defined by  
40  
41 monoclonal antibody Ki-67. *Am J Pathol* 1991;**138**:867-73.  
42  
43 42. Rodriguez-Alonso A, Pita-Fernandez S, Gonzalez-Carrero J, *et al.* p53 and ki67  
44  
45 expression as prognostic factors for cancer-related survival in stage T1 transitional  
46  
47 cell bladder carcinoma. *Eur Urol* 2002;**41**:182-8; discussion 88-9.  
48  
49 43. McCormick Matthews LH, Noble F, Tod J, *et al.* Systematic review and  
50  
51 meta-analysis of immunohistochemical prognostic biomarkers in resected  
52  
53  
54  
55  
56

oesophageal adenocarcinoma. *Br J Cancer* 2015;**113**:107-18.  
doi:10.1038/bjc.2015.179.

44. Gui Y, Xu S, Yang X, *et al.* A meta-analysis of biomarkers for the prognosis of triple-negative breast cancer patients. *Biomark Med* 2016;**10**:771-90.  
doi:10.2217/bmm-2015-0064.

45. Qiu HL, Deng SZ, Li C, *et al.* High expression of KIF14 is associated with poor prognosis in patients with epithelial ovarian cancer. *Eur Rev Med Pharmacol Sci* 2017;**21**:239-45.

46. Luo Y, Zhang X, Mo M, *et al.* High Ki-67 Immunohistochemical Reactivity Correlates With Poor Prognosis in Bladder Carcinoma: A Comprehensive Meta-Analysis with 13,053 Patients Involved. *Medicine (Baltimore)* 2016;**95**:e3337.  
doi:10.1097/md.0000000000003337.

47. Zhou X, Zhang G, Tian Y. p53 Status correlates with the risk of recurrence in non-muscle invasive bladder cancers treated with Bacillus Calmette-Guerin: a meta-analysis. *PLoS One* 2015;**10**:e0119476. doi:10.1371/journal.pone.0119476.

48. Du J, Wang SH, Yang Q, *et al.* p53 status correlates with the risk of progression in stage T1 bladder cancer: a meta-analysis. *World J Surg Oncol* 2016;**14**:137.  
doi:10.1186/s12957-016-0890-9.

49. Fridman JS, Lowe SW. Control of apoptosis by p53. *Oncogene* 2003;**22**:9030-40.  
doi:10.1038/sj.onc.1207116.

50. Muller PA, Vousden KH, Norman JC. p53 and its mutants in tumor cell migration and invasion. *J Cell Biol* 2011;**192**:209-18. doi:10.1083/jcb.201009059.

### **Figure File**

**Figure 1.** Flow diagram of study selection.

1  
2  
3 **Figure 2.** Forest plots of HRs estimated for the relationship between the expression of  
4 ki67 and RFS (A) or PFS (B) among patients in NMIBC treated with BCG.

5  
6  
7 **Figure 3.** Galbraith plot analysis was used to evaluate heterogeneity and RFS (A) or  
8 PFS (B).

9  
10  
11 **Figure 4.** Funnel plots of the expression of ki67 and RFS (A) or PFS (B).

12  
13  
14  
15  
16 **Table File**

17  
18 **Table 1.** Main characteristics of all studies included in this meta-analysis

19  
20 **Table 2.** Quality of the included studies assessed by NOS

21  
22 **Table 3.** Subgroup results of RFS and heterogeneity test

23  
24 **Table 4.** Subgroup results of PFS and heterogeneity test

25  
26  
27  
28  
29 **Supplementary File**

30  
31 **Table S1.** PRISMA

32  
33 **Table S2.** Meta-regression analysis of RFS and PFS

34  
35 **Table S3.** Risk group stratification in NMIBC

36  
37  
38 **Figure S1.** Forest plots of HRs estimated for the relationship between the expression  
39 of ki67 and RFS after the aforementioned study was excluded

40  
41  
42 **Figure S2.** Forest plots of HRs estimated for the relationship between the expression  
43 of ki67 and PFS after the aforementioned study was excluded



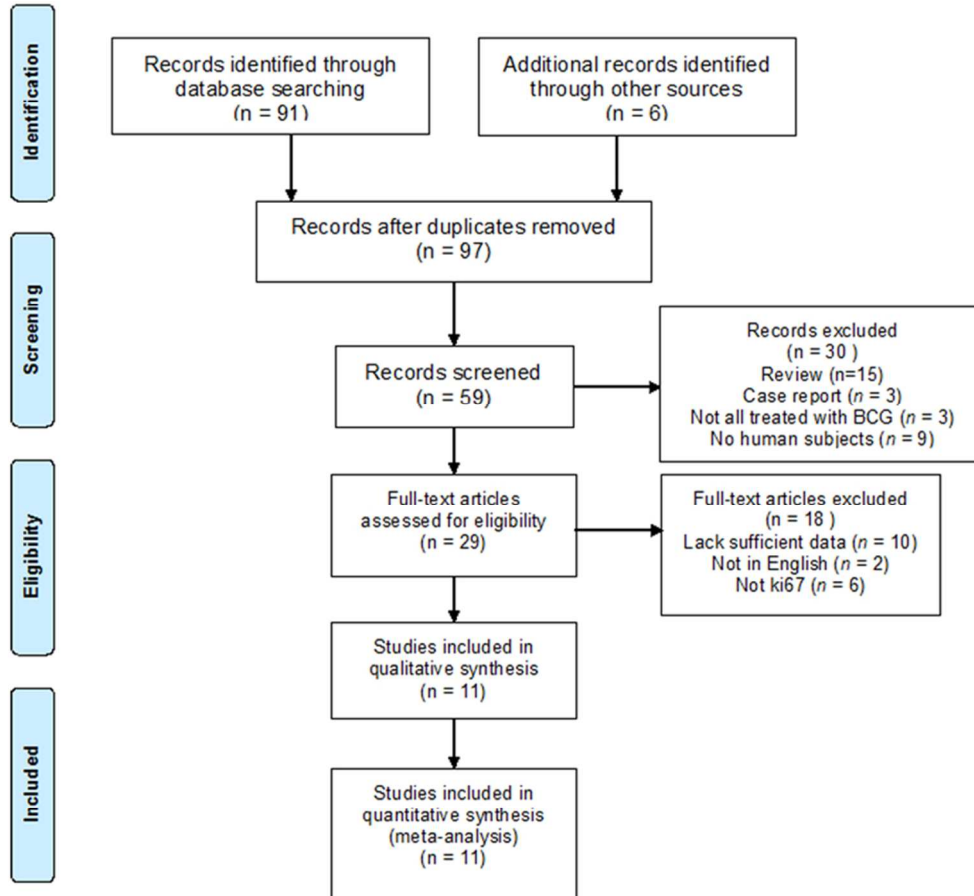

Figure 1. Flow diagram of study selection.

80x72mm (300 x 300 DPI)

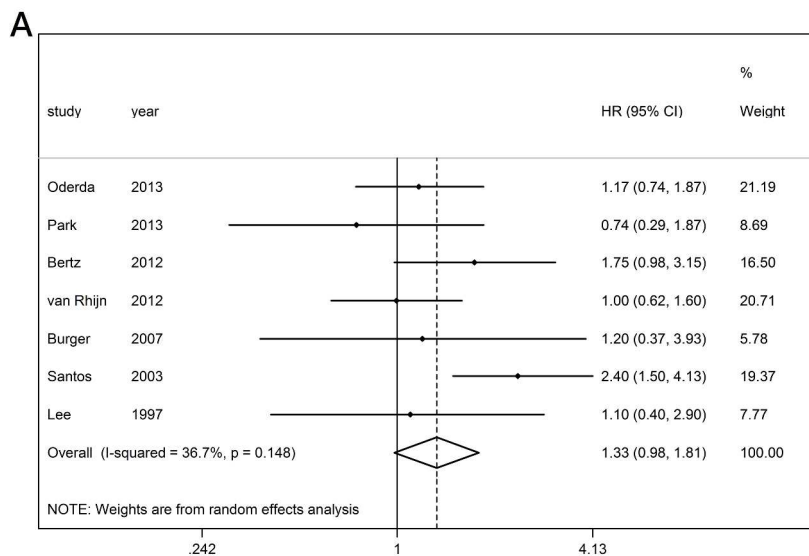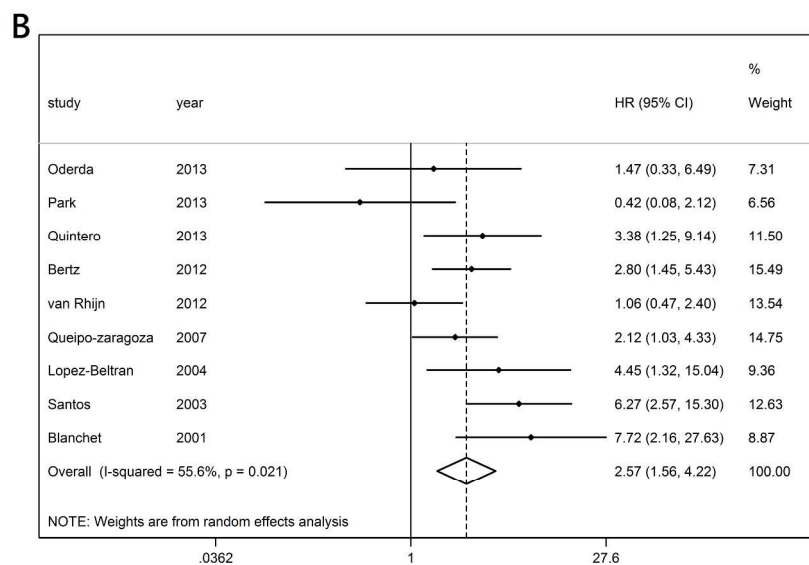

Forest plots of HRs estimated for the relationship between the expression of ki67 and RFS (A) or PFS (B) among patients in NMIBC treated with BCG.

267x381mm (300 x 300 DPI)

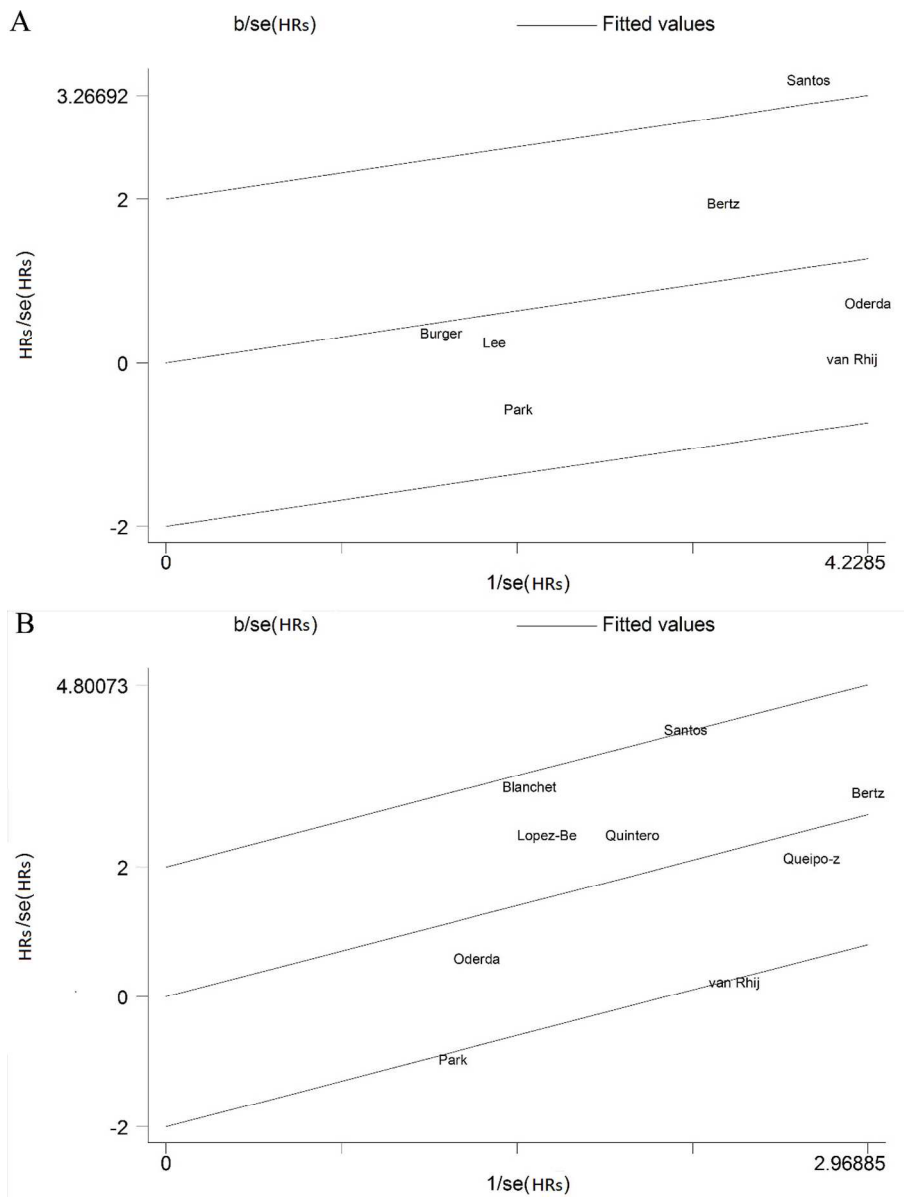

Galbraith plot analysis was used to evaluate heterogeneity and RFS (A) or PFS (B).

268x358mm (300 x 300 DPI)

1  
2  
3  
4  
5  
6  
7  
8  
9  
10  
11  
12  
13  
14  
15  
16  
17  
18  
19  
20  
21  
22  
23  
24  
25  
26  
27  
28  
29  
30  
31  
32  
33  
34  
35  
36  
37  
38  
39  
40  
41  
42  
43  
44  
45  
46  
47  
48  
49  
50  
51  
52  
53  
54  
55  
56  
57  
58  
59  
60

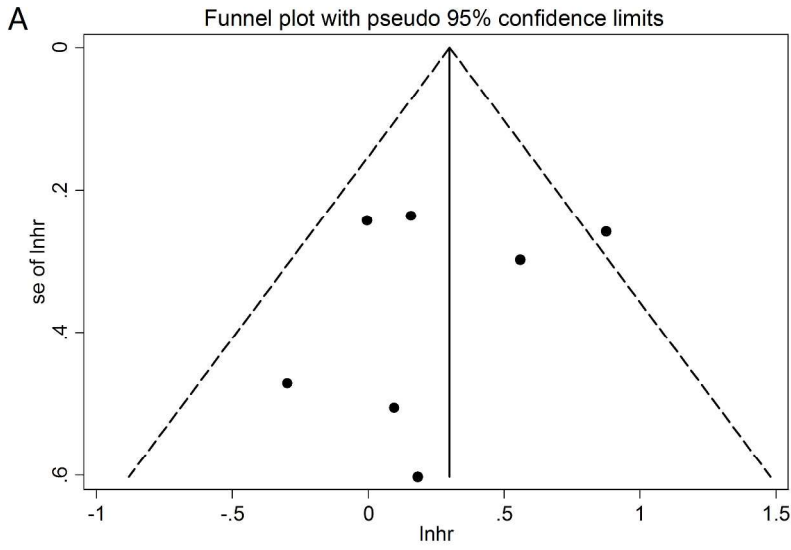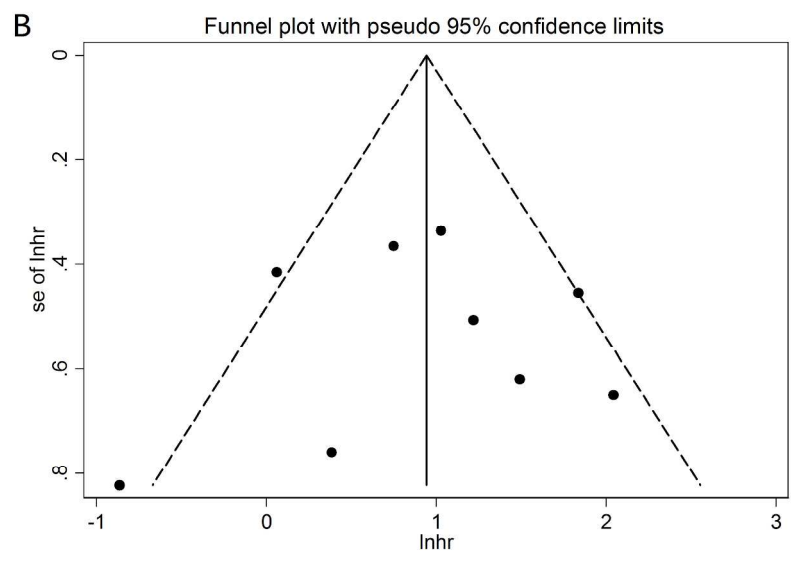

Funnel plots of the expression of ki67 and RFS (A) or PFS (B).

267x392mm (300 x 300 DPI)

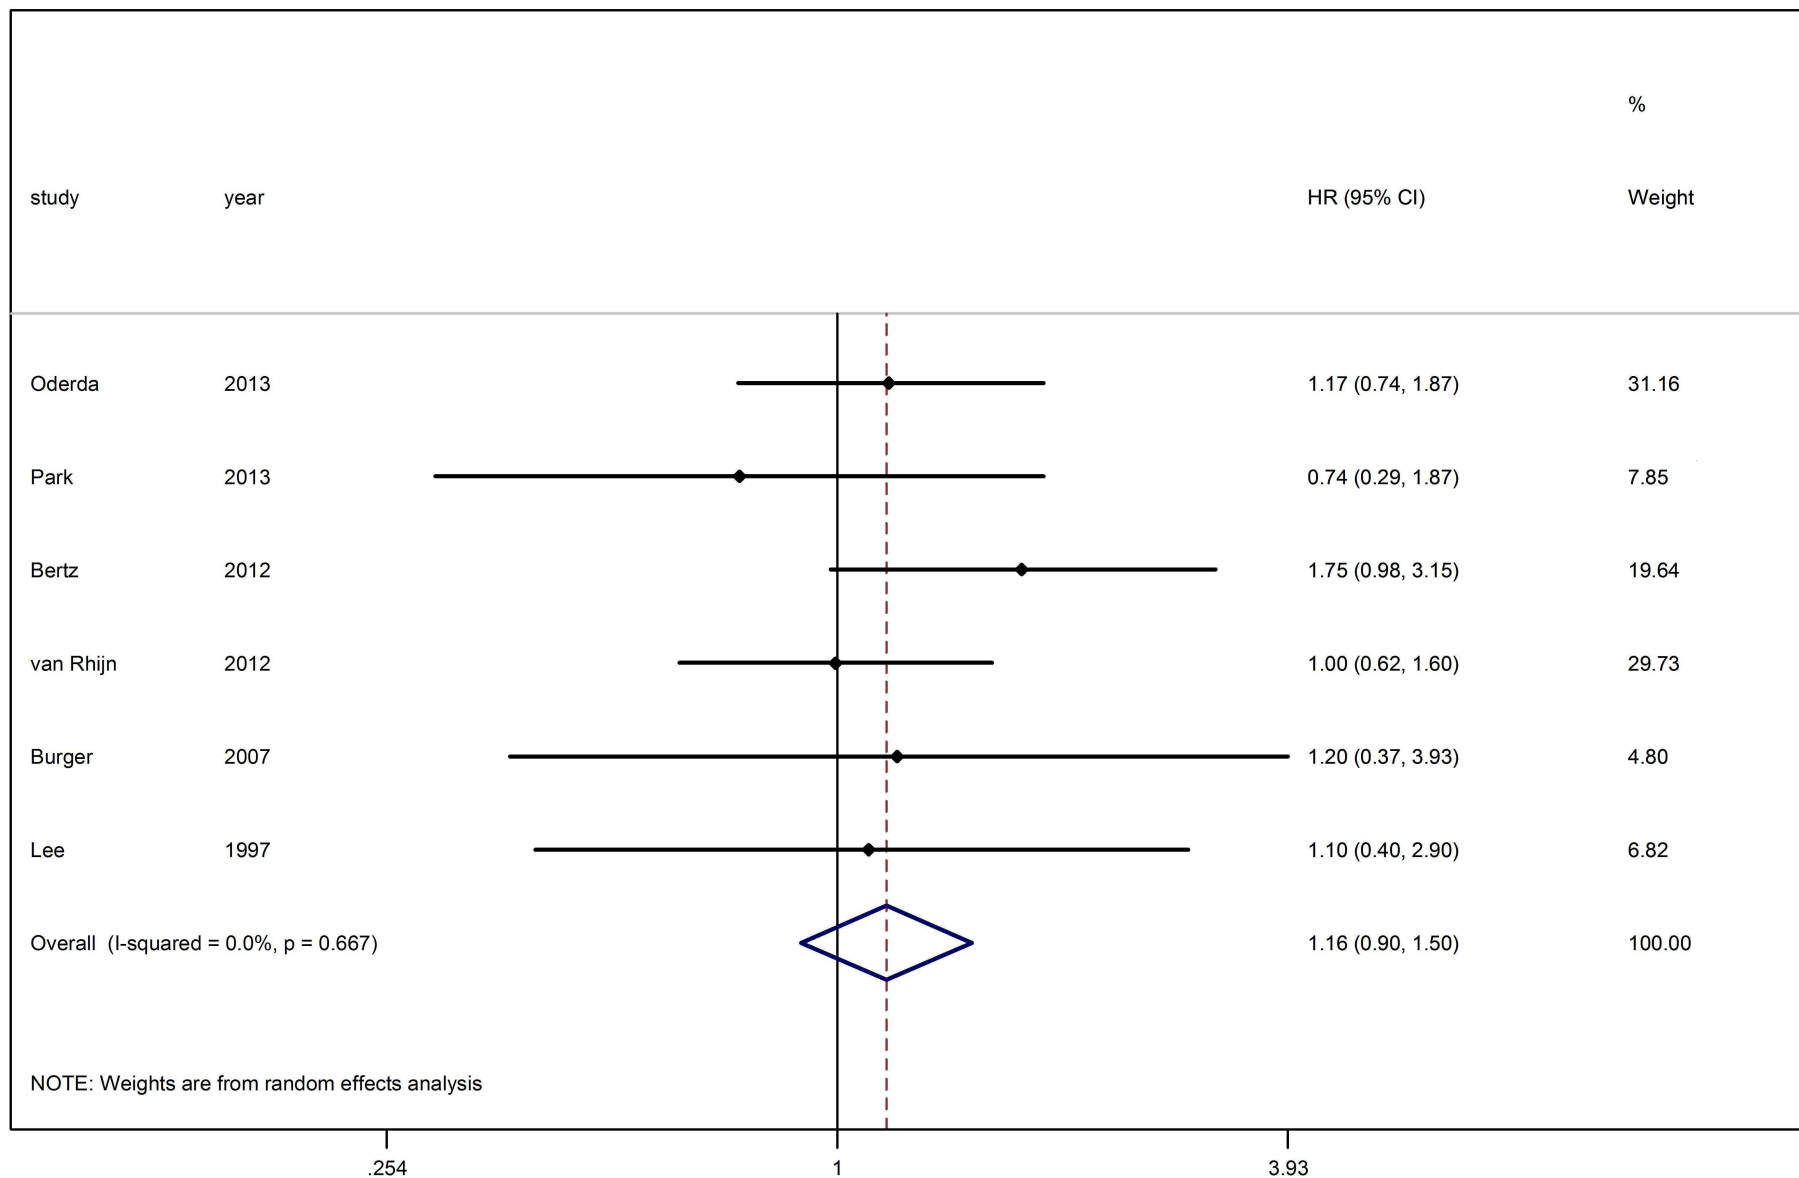

**Figure S1.** Forest plots of HRs estimated for the relationship between the expression of ki67 and RFS after the aforementioned study was excluded

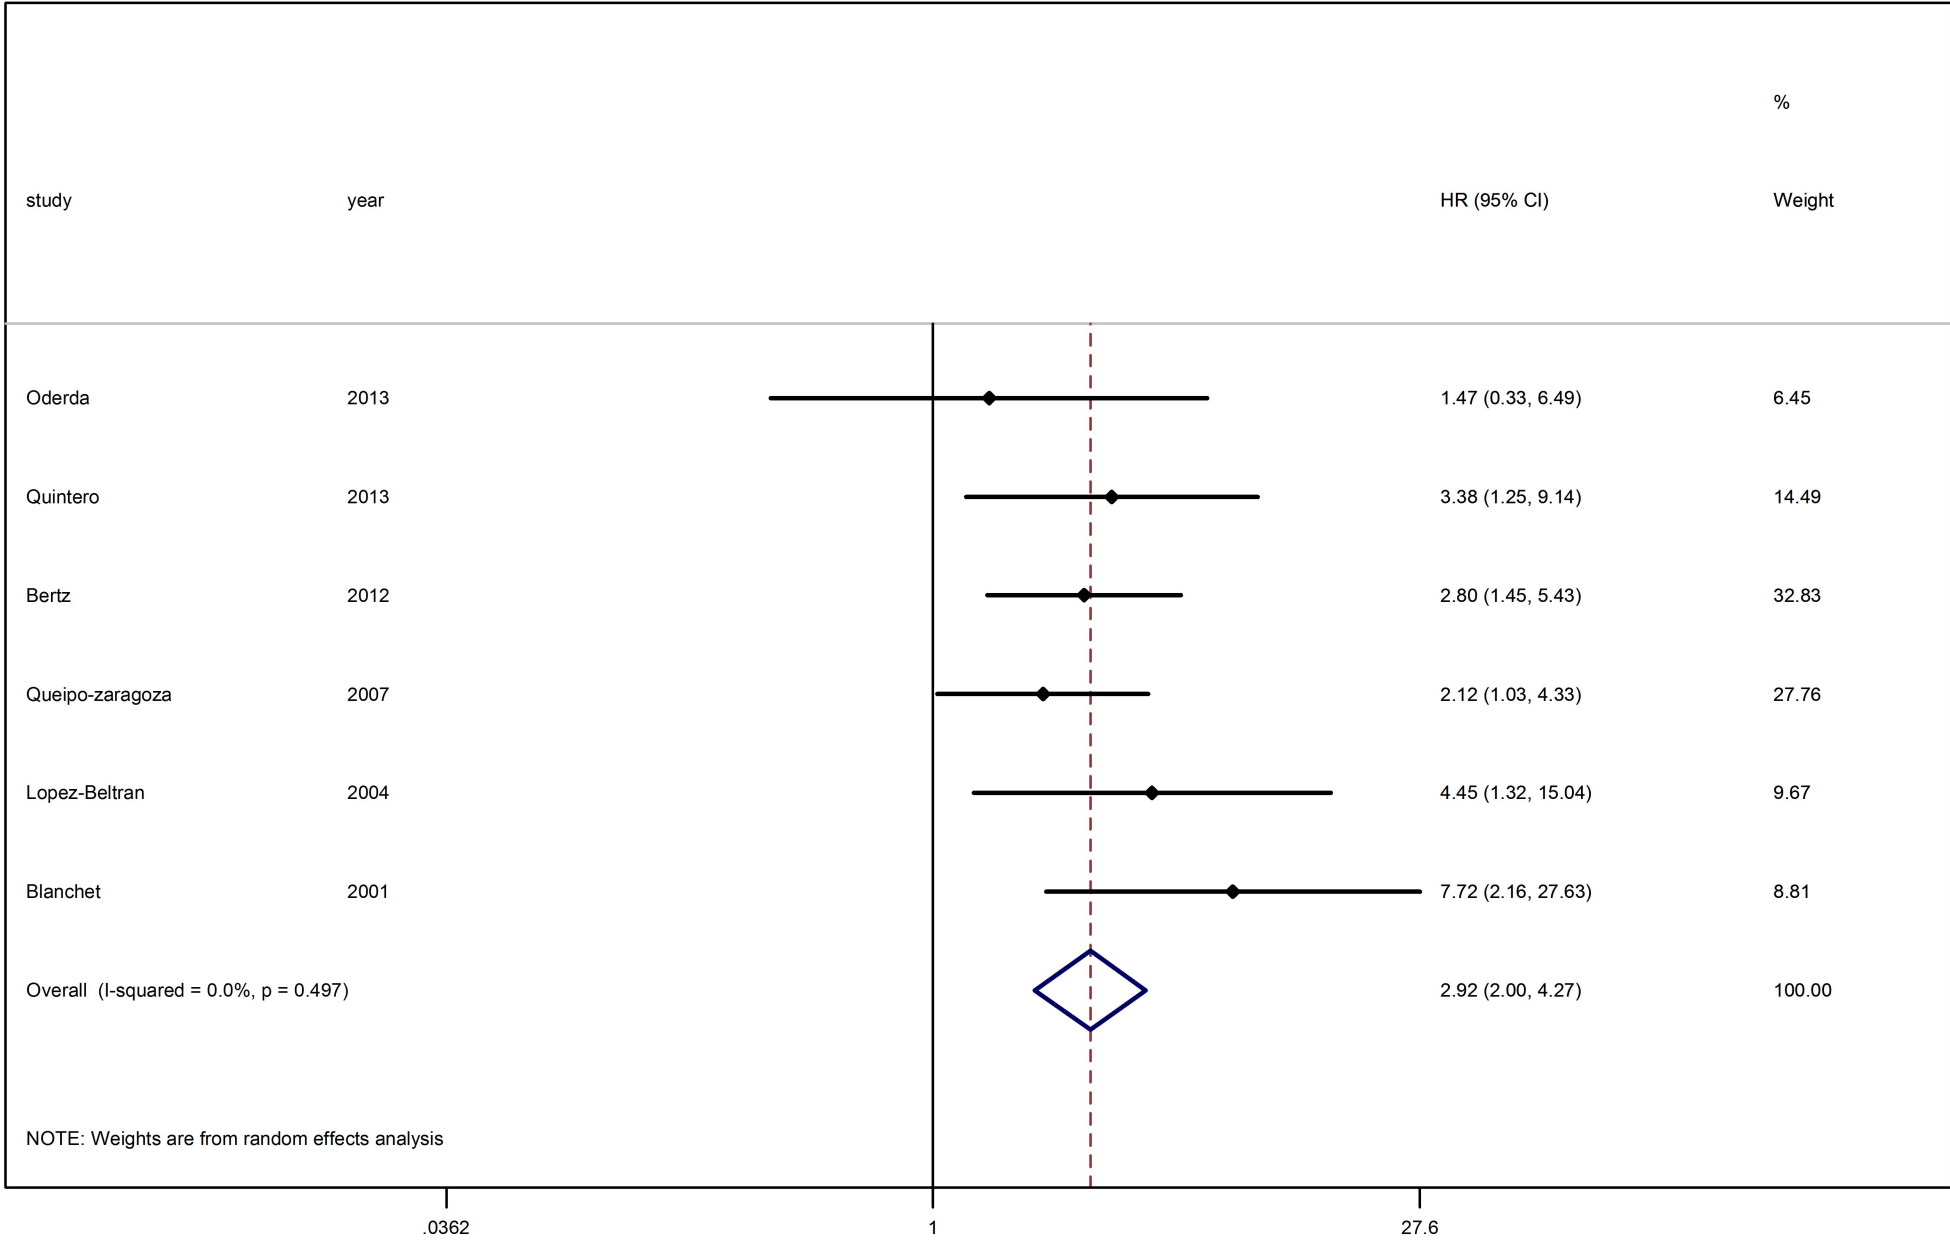

Figure S2. Forest plots of HRs estimated for the relationship between the expression of ki67 and PFS after the aforementioned study was excluded

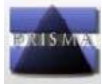

# PRISMA 2009 Checklist

| Section/topic                      | #  | Checklist item                                                                                                                                                                                                                                                                                              | Reported on page # |
|------------------------------------|----|-------------------------------------------------------------------------------------------------------------------------------------------------------------------------------------------------------------------------------------------------------------------------------------------------------------|--------------------|
| <b>TITLE</b>                       |    |                                                                                                                                                                                                                                                                                                             |                    |
| Title                              | 1  | Identify the report as a systematic review, meta-analysis, or both.                                                                                                                                                                                                                                         | 1                  |
| <b>ABSTRACT</b>                    |    |                                                                                                                                                                                                                                                                                                             |                    |
| Structured summary                 | 2  | Provide a structured summary including, as applicable: background; objectives; data sources; study eligibility criteria, participants, and interventions; study appraisal and synthesis methods; results; limitations; conclusions and implications of key findings; systematic review registration number. | 3                  |
| <b>INTRODUCTION</b>                |    |                                                                                                                                                                                                                                                                                                             |                    |
| Rationale                          | 3  | Describe the rationale for the review in the context of what is already known.                                                                                                                                                                                                                              | 4-6                |
| Objectives                         | 4  | Provide an explicit statement of questions being addressed with reference to participants, interventions, comparisons, outcomes, and study design (PICOS).                                                                                                                                                  | 4-6                |
| <b>METHODS</b>                     |    |                                                                                                                                                                                                                                                                                                             |                    |
| Protocol and registration          | 5  | Indicate if a review protocol exists, if and where it can be accessed (e.g., Web address), and, if available, provide registration information including registration number.                                                                                                                               | 7                  |
| Eligibility criteria               | 6  | Specify study characteristics (e.g., PICOS, length of follow-up) and report characteristics (e.g., years considered, language, publication status) used as criteria for eligibility, giving rationale.                                                                                                      | 7                  |
| Information sources                | 7  | Describe all information sources (e.g., databases with dates of coverage, contact with study authors to identify additional studies) in the search and date last searched.                                                                                                                                  | 7                  |
| Search                             | 8  | Present full electronic search strategy for at least one database, including any limits used, such that it could be repeated.                                                                                                                                                                               | 7                  |
| Study selection                    | 9  | State the process for selecting studies (i.e., screening, eligibility, included in systematic review, and, if applicable, included in the meta-analysis).                                                                                                                                                   | 7-8                |
| Data collection process            | 10 | Describe method of data extraction from reports (e.g., piloted forms, independently, in duplicate) and any processes for obtaining and confirming data from investigators.                                                                                                                                  | 7-8                |
| Data items                         | 11 | List and define all variables for which data were sought (e.g., PICOS, funding sources) and any assumptions and simplifications made.                                                                                                                                                                       | 8-9                |
| Risk of bias in individual studies | 12 | Describe methods used for assessing risk of bias of individual studies (including specification of whether this was done at the study or outcome level), and how this information is to be used in any data synthesis.                                                                                      | 9                  |
| Summary measures                   | 13 | State the principal summary measures (e.g., risk ratio, difference in means).                                                                                                                                                                                                                               | 8-9                |
| Synthesis of results               | 14 | Describe the methods of handling data and combining results of studies, if done, including measures of consistency (e.g., $I^2$ ) for each meta-analysis.                                                                                                                                                   | 8-9                |

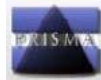

# PRISMA 2009 Checklist

| Section/topic                 | #  | Checklist item                                                                                                                                                                                           | Reported on page # |
|-------------------------------|----|----------------------------------------------------------------------------------------------------------------------------------------------------------------------------------------------------------|--------------------|
| Risk of bias across studies   | 15 | Specify any assessment of risk of bias that may affect the cumulative evidence (e.g., publication bias, selective reporting within studies).                                                             | 9                  |
| Additional analyses           | 16 | Describe methods of additional analyses (e.g., sensitivity or subgroup analyses, meta-regression), if done, indicating which were pre-specified.                                                         | 9                  |
| <b>RESULTS</b>                |    |                                                                                                                                                                                                          |                    |
| Study selection               | 17 | Give numbers of studies screened, assessed for eligibility, and included in the review, with reasons for exclusions at each stage, ideally with a flow diagram.                                          | 9-10               |
| Study characteristics         | 18 | For each study, present characteristics for which data were extracted (e.g., study size, PICOS, follow-up period) and provide the citations.                                                             | 10-12              |
| Risk of bias within studies   | 19 | Present data on risk of bias of each study and, if available, any outcome level assessment (see item 12).                                                                                                | 17                 |
| Results of individual studies | 20 | For all outcomes considered (benefits or harms), present, for each study: (a) simple summary data for each intervention group (b) effect estimates and confidence intervals, ideally with a forest plot. | 13-16              |
| Synthesis of results          | 21 | Present results of each meta-analysis done, including confidence intervals and measures of consistency.                                                                                                  | 9-17               |
| Risk of bias across studies   | 22 | Present results of any assessment of risk of bias across studies (see Item 15).                                                                                                                          | 17                 |
| Additional analysis           | 23 | Give results of additional analyses, if done (e.g., sensitivity or subgroup analyses, meta-regression [see Item 16]).                                                                                    | 17                 |
| <b>DISCUSSION</b>             |    |                                                                                                                                                                                                          |                    |
| Summary of evidence           | 24 | Summarize the main findings including the strength of evidence for each main outcome; consider their relevance to key groups (e.g., healthcare providers, users, and policy makers).                     | 17-22              |
| Limitations                   | 25 | Discuss limitations at study and outcome level (e.g., risk of bias), and at review-level (e.g., incomplete retrieval of identified research, reporting bias).                                            | 22                 |
| Conclusions                   | 26 | Provide a general interpretation of the results in the context of other evidence, and implications for future research.                                                                                  | 22                 |
| <b>FUNDING</b>                |    |                                                                                                                                                                                                          |                    |
| Funding                       | 27 | Describe sources of funding for the systematic review and other support (e.g., supply of data); role of funders for the systematic review.                                                               | 23                 |

From: Moher D, Liberati A, Tetzlaff J, Altman DG, The PRISMA Group (2009). Preferred Reporting Items for Systematic Reviews and Meta-Analyses: The PRISMA Statement. PLoS Med 6(6): e1000097. doi:10.1371/journal.pmed1000097

For more information, visit: [www.prisma-statement.org](http://www.prisma-statement.org).



Table S2. Meta-regression analysis of RFS and PFS

## PFS

| Heterogeneity factor | Coefficient | SE     | <i>t</i> | <i>P</i> |
|----------------------|-------------|--------|----------|----------|
| Years                | -0.0343     | 0.0283 | -1.21    | 0.280    |
| Country              |             |        |          |          |
| 1                    | -0.3899     | 0.3716 | -1.05    | 0.404    |
| 2                    | -0.7185     | 0.3503 | -2.05    | 0.177    |
| 3                    | -0.9900     | 0.4307 | -2.30    | 0.148    |
| 4                    | -0.8805     | 0.3541 | -2.49    | 0.131    |
| Numbers of patients  | 0.0022      | 0.0020 | 1.16     | 0.299    |
| Stage                | None        |        |          |          |
| Cutoff               | -0.0098     | 0.0407 | -0.24    | 0.819    |
| Age                  | 0.0021      | 0.0395 | 0.05     | 0.959    |
| Follow-up            | -0.0062     | 0.0065 | -0.96    | 0.379    |

## PFS

| Heterogeneity factor | Coefficient | SE     | <i>t</i> | <i>P</i> |
|----------------------|-------------|--------|----------|----------|
| Years                | -0.1195     | 0.0461 | -2.59    | 0.036    |
| Country              |             |        |          |          |

|    |           |         |        |        |       |
|----|-----------|---------|--------|--------|-------|
| 1  |           |         |        |        |       |
| 2  |           |         |        |        |       |
| 3  |           |         |        |        |       |
| 4  | 1         | 0.2080  | 0.7936 | 0.26   | 0.818 |
| 5  |           |         |        |        |       |
| 6  | 2         | -0.8062 | 0.5662 | -1.42  | 0.290 |
| 7  |           |         |        |        |       |
| 8  |           |         |        |        |       |
| 9  | 3         | -1.4505 | 0.8858 | -1.64  | 0.243 |
| 10 |           |         |        |        |       |
| 11 | 4         | -2.7009 | 0.9407 | -2.87  | 0.103 |
| 12 |           |         |        |        |       |
| 13 |           |         |        |        |       |
| 14 | 5         | -1.7766 | 0.6167 | -2.88  | 0.102 |
| 15 |           |         |        |        |       |
| 16 | 6         | -0.8158 | 0.5281 | -1.54  | 0.262 |
| 17 |           |         |        |        |       |
| 18 |           |         |        |        |       |
| 19 | Numbers   | of      | 0.0006 | 0.0036 | 0.16  |
| 20 |           |         |        |        |       |
| 21 | patients  |         |        |        |       |
| 22 |           |         |        |        |       |
| 23 |           |         |        |        |       |
| 24 |           |         |        |        |       |
| 25 | Stage     |         |        |        |       |
| 26 |           |         |        |        |       |
| 27 | 1         | -1.4505 | 1.5909 | -0.91  | 0.458 |
| 28 |           |         |        |        |       |
| 29 | 2         | -0.8062 | 1.4108 | -0.57  | 0.625 |
| 30 |           |         |        |        |       |
| 31 | 3         | 0.2080  | 1.5332 | 0.14   | 0.904 |
| 32 |           |         |        |        |       |
| 33 | 4         | -1.7766 | 1.4353 | -1.24  | 0.341 |
| 34 |           |         |        |        |       |
| 35 | 5         | -1.2560 | 1.2069 | -1.04  | 0.407 |
| 36 |           |         |        |        |       |
| 37 | 6         | -0.6170 | 1.4689 | -0.42  | 0.715 |
| 38 |           |         |        |        |       |
| 39 |           |         |        |        |       |
| 40 |           |         |        |        |       |
| 41 |           |         |        |        |       |
| 42 | Cutoff    | -0.0177 | 0.0309 | -0.57  | 0.585 |
| 43 |           |         |        |        |       |
| 44 | Age       | -0.0672 | 0.0757 | -0.89  | 0.404 |
| 45 |           |         |        |        |       |
| 46 | Follow-up | -0.0118 | 0.0159 | -0.74  | 0.483 |
| 47 |           |         |        |        |       |
| 48 |           |         |        |        |       |
| 49 |           |         |        |        |       |
| 50 |           |         |        |        |       |
| 51 |           |         |        |        |       |
| 52 |           |         |        |        |       |
| 53 |           |         |        |        |       |
| 54 |           |         |        |        |       |
| 55 |           |         |        |        |       |
| 56 |           |         |        |        |       |
| 57 |           |         |        |        |       |
| 58 |           |         |        |        |       |
| 59 |           |         |        |        |       |
| 60 |           |         |        |        |       |

Table S3. Risk group stratification in NMIBC

|                                 |                                                                                                                                                                                 |
|---------------------------------|---------------------------------------------------------------------------------------------------------------------------------------------------------------------------------|
| <b>Low-risk tumors</b>          | Primary, solitary, Ta, LG/G1, <3 cm, no CIS                                                                                                                                     |
| <b>Intermediate-risk tumors</b> | All tumors not defined in the two adjacent categories (between the category of low and high risk)                                                                               |
| <b>High-risk tumors</b>         | Any of the following:<br><br>T1 tumor<br><br>HG/G3 tumor<br><br>CIS<br><br>Multiple, recurrent, and large (>3 cm) Ta G1G2 tumors (all conditions must be present at this point) |

NMIBC, non-muscle-invasive bladder cancer; CIS, carcinoma in situ; HG, high grade; LG, low grade.

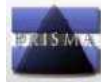

# PRISMA 2009 Checklist

| Section/topic                      | #  | Checklist item                                                                                                                                                                                                                                                                                              | Reported on page # |
|------------------------------------|----|-------------------------------------------------------------------------------------------------------------------------------------------------------------------------------------------------------------------------------------------------------------------------------------------------------------|--------------------|
| <b>TITLE</b>                       |    |                                                                                                                                                                                                                                                                                                             |                    |
| Title                              | 1  | Identify the report as a systematic review, meta-analysis, or both.                                                                                                                                                                                                                                         | 1                  |
| <b>ABSTRACT</b>                    |    |                                                                                                                                                                                                                                                                                                             |                    |
| Structured summary                 | 2  | Provide a structured summary including, as applicable: background; objectives; data sources; study eligibility criteria, participants, and interventions; study appraisal and synthesis methods; results; limitations; conclusions and implications of key findings; systematic review registration number. | 3                  |
| <b>INTRODUCTION</b>                |    |                                                                                                                                                                                                                                                                                                             |                    |
| Rationale                          | 3  | Describe the rationale for the review in the context of what is already known.                                                                                                                                                                                                                              | 4-6                |
| Objectives                         | 4  | Provide an explicit statement of questions being addressed with reference to participants, interventions, comparisons, outcomes, and study design (PICOS).                                                                                                                                                  | 4-6                |
| <b>METHODS</b>                     |    |                                                                                                                                                                                                                                                                                                             |                    |
| Protocol and registration          | 5  | Indicate if a review protocol exists, if and where it can be accessed (e.g., Web address), and, if available, provide registration information including registration number.                                                                                                                               | 7                  |
| Eligibility criteria               | 6  | Specify study characteristics (e.g., PICOS, length of follow-up) and report characteristics (e.g., years considered, language, publication status) used as criteria for eligibility, giving rationale.                                                                                                      | 7                  |
| Information sources                | 7  | Describe all information sources (e.g., databases with dates of coverage, contact with study authors to identify additional studies) in the search and date last searched.                                                                                                                                  | 7                  |
| Search                             | 8  | Present full electronic search strategy for at least one database, including any limits used, such that it could be repeated.                                                                                                                                                                               | 7                  |
| Study selection                    | 9  | State the process for selecting studies (i.e., screening, eligibility, included in systematic review, and, if applicable, included in the meta-analysis).                                                                                                                                                   | 7-8                |
| Data collection process            | 10 | Describe method of data extraction from reports (e.g., piloted forms, independently, in duplicate) and any processes for obtaining and confirming data from investigators.                                                                                                                                  | 7-8                |
| Data items                         | 11 | List and define all variables for which data were sought (e.g., PICOS, funding sources) and any assumptions and simplifications made.                                                                                                                                                                       | 8-9                |
| Risk of bias in individual studies | 12 | Describe methods used for assessing risk of bias of individual studies (including specification of whether this was done at the study or outcome level), and how this information is to be used in any data synthesis.                                                                                      | 9                  |
| Summary measures                   | 13 | State the principal summary measures (e.g., risk ratio, difference in means).                                                                                                                                                                                                                               | 8-9                |
| Synthesis of results               | 14 | Describe the methods of handling data and combining results of studies, if done, including measures of consistency (e.g., $I^2$ ) for each meta-analysis.                                                                                                                                                   | 8-9                |

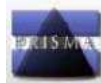

# PRISMA 2009 Checklist

| Section/topic                 | #  | Checklist item                                                                                                                                                                                           | Reported on page # |
|-------------------------------|----|----------------------------------------------------------------------------------------------------------------------------------------------------------------------------------------------------------|--------------------|
| Risk of bias across studies   | 15 | Specify any assessment of risk of bias that may affect the cumulative evidence (e.g., publication bias, selective reporting within studies).                                                             | 9                  |
| Additional analyses           | 16 | Describe methods of additional analyses (e.g., sensitivity or subgroup analyses, meta-regression), if done, indicating which were pre-specified.                                                         | 9                  |
| <b>RESULTS</b>                |    |                                                                                                                                                                                                          |                    |
| Study selection               | 17 | Give numbers of studies screened, assessed for eligibility, and included in the review, with reasons for exclusions at each stage, ideally with a flow diagram.                                          | 9-10               |
| Study characteristics         | 18 | For each study, present characteristics for which data were extracted (e.g., study size, PICOS, follow-up period) and provide the citations.                                                             | 10-12              |
| Risk of bias within studies   | 19 | Present data on risk of bias of each study and, if available, any outcome level assessment (see item 12).                                                                                                | 17                 |
| Results of individual studies | 20 | For all outcomes considered (benefits or harms), present, for each study: (a) simple summary data for each intervention group (b) effect estimates and confidence intervals, ideally with a forest plot. | 13-16              |
| Synthesis of results          | 21 | Present results of each meta-analysis done, including confidence intervals and measures of consistency.                                                                                                  | 9-17               |
| Risk of bias across studies   | 22 | Present results of any assessment of risk of bias across studies (see Item 15).                                                                                                                          | 17                 |
| Additional analysis           | 23 | Give results of additional analyses, if done (e.g., sensitivity or subgroup analyses, meta-regression [see Item 16]).                                                                                    | 17                 |
| <b>DISCUSSION</b>             |    |                                                                                                                                                                                                          |                    |
| Summary of evidence           | 24 | Summarize the main findings including the strength of evidence for each main outcome; consider their relevance to key groups (e.g., healthcare providers, users, and policy makers).                     | 17-22              |
| Limitations                   | 25 | Discuss limitations at study and outcome level (e.g., risk of bias), and at review-level (e.g., incomplete retrieval of identified research, reporting bias).                                            | 22                 |
| Conclusions                   | 26 | Provide a general interpretation of the results in the context of other evidence, and implications for future research.                                                                                  | 22                 |
| <b>FUNDING</b>                |    |                                                                                                                                                                                                          |                    |
| Funding                       | 27 | Describe sources of funding for the systematic review and other support (e.g., supply of data); role of funders for the systematic review.                                                               | 23                 |

From: Moher D, Liberati A, Tetzlaff J, Altman DG, The PRISMA Group (2009). Preferred Reporting Items for Systematic Reviews and Meta-Analyses: The PRISMA Statement. PLoS Med 6(6): e1000097. doi:10.1371/journal.pmed1000097

For more information, visit: [www.prisma-statement.org](http://www.prisma-statement.org).

# BMJ Open

## Prognostic Value of ki67 in Bacillus Calmette–Guérin-Treated Non-muscle-Invasive Bladder Cancer: a Meta-analysis and Systematic Review

|                                 |                                                                                                                                                                                                                                                                                                                                                                                                                                                                                                                                                                                                                                                                                                                                 |
|---------------------------------|---------------------------------------------------------------------------------------------------------------------------------------------------------------------------------------------------------------------------------------------------------------------------------------------------------------------------------------------------------------------------------------------------------------------------------------------------------------------------------------------------------------------------------------------------------------------------------------------------------------------------------------------------------------------------------------------------------------------------------|
| Journal:                        | <i>BMJ Open</i>                                                                                                                                                                                                                                                                                                                                                                                                                                                                                                                                                                                                                                                                                                                 |
| Manuscript ID                   | bmjopen-2017-019635.R2                                                                                                                                                                                                                                                                                                                                                                                                                                                                                                                                                                                                                                                                                                          |
| Article Type:                   | Research                                                                                                                                                                                                                                                                                                                                                                                                                                                                                                                                                                                                                                                                                                                        |
| Date Submitted by the Author:   | 14-Feb-2018                                                                                                                                                                                                                                                                                                                                                                                                                                                                                                                                                                                                                                                                                                                     |
| Complete List of Authors:       | He, Yuhui; Peking University China-Japan Friendship School of Clinical Medicine; China-Japan Friendship Hospital, Department of Urology<br>Wang, Ning; North China University of Science and Technology<br>Zhou, Xiaofeng; Peking University China-Japan Friendship School of Clinical Medicine; China-Japan Friendship Hospital, Department of Urology<br>Wang, Jianfeng; China-Japan Friendship Hospital, Department of Urology<br>Ding, Zhenshan; China-Japan Friendship Hospital, Department of Urology<br>Chen, Xing ; China-Japan Friendship Hospital, Department of Urology<br>Deng, Yisen; Peking University China-Japan Friendship School of Clinical Medicine; China-Japan Friendship Hospital, Department of Urology |
| <b>Primary Subject Heading</b>: | Urology                                                                                                                                                                                                                                                                                                                                                                                                                                                                                                                                                                                                                                                                                                                         |
| Secondary Subject Heading:      | Urology                                                                                                                                                                                                                                                                                                                                                                                                                                                                                                                                                                                                                                                                                                                         |
| Keywords:                       | ki67, meta-analysis, non-muscular-invasive bladder cancer, prognosis                                                                                                                                                                                                                                                                                                                                                                                                                                                                                                                                                                                                                                                            |
|                                 |                                                                                                                                                                                                                                                                                                                                                                                                                                                                                                                                                                                                                                                                                                                                 |

SCHOLARONE™  
Manuscripts

1  
2  
3 **Prognostic Value of ki67 in Bacillus Calmette–Guérin-Treated**  
4  
5  
6 **Non-muscle-Invasive Bladder Cancer: a Meta-analysis and**  
7  
8 **Systematic Review**  
9

10  
11 Yuhui He<sup>1,2</sup>, Ning Wang<sup>3</sup>, Xiaofeng Zhou<sup>1,2\*</sup>, Jianfeng Wang<sup>2</sup>, Zhenshan Ding<sup>2</sup>, Xing  
12  
13 Chen<sup>2</sup>, Yisen Deng<sup>1,2</sup>  
14

15  
16  
17 <sup>1</sup> Peking University China-Japan Friendship School of Clinical Medicine, Beijing  
18  
19 100029, China  
20

21 <sup>2</sup> Department of Urology, China-Japan Friendship Hospital, Beijing 100029, China  
22

23 <sup>3</sup> North China University of Science and Technology, Tangshan 063013, China  
24  
25  
26  
27

28 **\*Corresponding Author**  
29

30 Xiaofeng Zhou  
31

32 Peking University China-Japan Friendship School of Clinical Medicine, Beijing  
33  
34 100029, China  
35

36 Department of Urology, China-Japan Friendship Hospital, Beijing 100029, China  
37

38  
39 **Tel:** +86 13121391766  
40

41 **Email:** doctorzxf@126.com  
42

43 **Fax:** +86 64217749  
44  
45  
46  
47

48 **Word count**  
49

50 Title page: 98  
51

52 Abstract: 251  
53

54 References: 1403  
55  
56  
57  
58  
59  
60

1  
2  
3 Number of tables, figures, supplementary files: 4, 4, 6  
4  
5  
6  
7  
8  
9  
10  
11  
12  
13  
14  
15  
16  
17  
18  
19  
20  
21  
22  
23  
24  
25  
26  
27  
28  
29  
30  
31  
32  
33  
34  
35  
36  
37  
38  
39  
40  
41  
42  
43  
44  
45  
46  
47  
48  
49  
50  
51  
52  
53  
54  
55  
56  
57  
58  
59  
60

For peer review only



### **Abstract**

**Objectives:** The aim of this study was to explore the prognostic value of ki67 as a marker in non-muscle-invasive bladder cancer (NMIBC) patients treated with Bacillus Calmette–Guérin (BCG).

**Methods:** Studies were systematically retrieved from the relevant databases (Web of Science, PubMed, Cochrane Library, and Embase), and the expiry date was May 2017. The research steps referred to the Preferred Reporting Items for Systematic Reviews and Meta-Analysis statement.

**Results:** A total of 11 studies that complied with the inclusion criteria were enrolled. The expression of ki67 was not statistically significantly associated with recurrence-free survival (RFS) [hazard ratio (HR): 1.331; 95% CI: 0.980–1.809]. No significant heterogeneity was found among all included studies ( $I^2 = 36.7%$ ,  $P = 0.148$ ). The expression of ki67 was statistically significantly associated with progression-free survival (PFS) (HR: 2.567; 95% CI: 1.562–4.219), and the overexpression of ki67 was the risk factor for PFS. Significant heterogeneity was noted among all the included studies ( $I^2 = 55.6%$ ,  $P = 0.021$ ). The studies that might cause heterogeneity were excluded using the Galbraith plot, and then the meta-analysis was performed again. The results showed that the expression of ki67 was still associated with PFS (HR: 2.922; 95% CI: 2.002–4.266).

**Conclusions:** The overexpression of ki67 was the risk factor for PFS, and the relationship between the expression of ki67 and RFS was not statistically significant in patients with NMIBC treated with BCG intravesical immunotherapy. Well-designed, prospective, randomized controlled trials with a large sample size are still needed to validate the findings.

**Key words:** ki67; meta-analysis; non-muscular-invasive bladder cancer; prognosis

### ***Strengths and limitations of this study***

This meta-analysis and systematic review was performed via a strict literature search.

It was the first meta-analysis to evaluate the prognostic value of ki67 in patients with NMIBC after transurethral resection and BCG intravesical immunotherapy.

The number of studies considered in the final meta-analysis was 11. This small sample size limited the potential analyses. The research did not consider the surgical skills mentioned in published studies.

Despite a systematic search strategy, the inclusion criteria excluded non-English documents and had language bias. The meta-regression analysis suggested no bias, but a selection bias was likely.

These limitations notwithstanding, the research can guide the follow-up research on immunohistochemical markers and clinical practice in non-muscular-invasive bladder cancer.

### ***Introduction***

Bladder cancer is one of the most common clinical urological tumors. It is a direct threat to the survival of patients with the disease. The incidence of bladder cancer varies across the world, with the highest rate in the developed communities.<sup>1</sup> A total of 429,800 new cases of bladder cancer and 165,100 deaths occurred in 2012 worldwide. Bladder cancer occurs mostly in men, and about a tenfold variation in incidence rates has been reported internationally.<sup>2</sup> About 70% of these patients have non-muscle-invasive bladder cancer (NMIBC).<sup>3</sup> Four major organizational guidelines on NMIBC, including the American Urological Association/Society of Urologic Oncology, the European Association of Urology, the National Comprehensive Cancer

1  
2  
3 Network, and the National Institute for Health and Care Excellence guidelines,  
4 recommend that the proper initial transurethral resection (TUR) of bladder tumor is a  
5 critical step in the initial management and staging of the disease.<sup>4</sup> However, TUR  
6 surgery alone cannot solve the postoperative problems for NMIBC because of high  
7 recurrence rate and disease development.<sup>5</sup> Postoperative TUR associated with  
8 Bacillus Calmette–Guérin (BCG) intravesical immunotherapy can prevent the  
9 postoperative recurrence of NMIBC and significantly reduce the moderate and high  
10 development risk of NMIBC.<sup>6, 7</sup> However, the postoperative BCG intravesical  
11 immunotherapy still has some problems. The failure rate of BCG intravesical therapy  
12 in NMIBC is about 40%–50%.<sup>8</sup> Furthermore, BCG has toxic side effects, such as  
13 hepatitis, pneumonitis, epididymitis/orchitis, abscess formation, bladder contracture,  
14 ureteral obstruction, BCG sepsis, leukopenia, and hematuria.<sup>9</sup> Therefore, BCG  
15 therapy should be individually performed, and the patients in whom BCG therapy is  
16 ineffective should be timely recognized. These patients or those with poor prognosis  
17 should receive radical cystectomy or any other therapy in time to avoid futile  
18 treatment and alleviate pain. However, the recognition of patients with no effect of  
19 TUR postoperative BCG intravesical immunotherapy is still hard due to the  
20 heterogeneity of bladder cancer and individuality of patients.<sup>10</sup> Therefore, finding the  
21 prognostic factors for patients with NMIBC receiving TUR and BCG therapy is  
22 extremely necessary.

23  
24  
25  
26  
27  
28  
29  
30  
31  
32  
33  
34  
35  
36  
37  
38  
39  
40  
41  
42  
43  
44  
45  
46 The recurrence rate of bladder cancer treated with different therapies is between 50%  
47 and 80%, and about 15% of the low-grade tumor recurrence involves high-grade  
48 tumors.<sup>11</sup> The patients need periodical cystoscopy to find the recurrent focus in time.  
49  
50  
51  
52 A reliable prognostic molecular marker can reduce the pain caused by cystoscopy.  
53  
54  
55 Because NMIBC does not have reliable prognostic markers, it is hard to decide

1  
2  
3 postoperative therapy in the clinic,<sup>12</sup> which depends mainly on the clinical guidelines  
4 and physician's experience. Currently, some of the published studies about  
5 immunohistochemical markers have evaluated the prognostic value of BCG  
6 intravesical immunotherapy on the patients first receiving TUR. The main  
7 immunohistochemical markers include ki67, p53, p27, pRb, CD9, CD20, E2F1, and  
8 so forth.<sup>13, 14</sup> However, no immunohistochemical marker has been confirmed so far.  
9  
10 The prognostic value of ki67 antigen on the survival in patients with NMIBC  
11 receiving BCG intravesical immunotherapy has been controversial. For example,  
12 Kruger<sup>15</sup> reported that ki67 antigen was an independent predictive factor for the  
13 recurrence of pT1 stage tumor, but Oderde<sup>16</sup> believed that ki67 was an independent  
14 predictive factor for the recurrence of all NMIBCs. Zlotta<sup>17</sup> reported that ki67 antigen  
15 had no independent prognostic value in patients receiving BCG therapy. Saint<sup>18</sup>  
16 retrospectively reviewed the recent 25-year published studies and believed that the independent  
17 prognostic factor for bladder cancer in patients receiving BCG therapy was not clear.  
18  
19 An international consensus group listed various bladder cancer prognostic indexes by  
20 reviewing PubMed and considered that although some markers (such as ki67 and p53)  
21 could predict the recurrence and development of bladder cancer, the data still had  
22 heterogeneity. Thus, strict test criteria and clear statistical methods should be  
23 established for further evaluation.<sup>19</sup>

24  
25  
26  
27  
28  
29  
30  
31  
32  
33  
34  
35  
36  
37  
38  
39  
40  
41  
42  
43  
44 A meta-analysis can enlarge the sample size by integrating independent studies with  
45 small sample size, further increase the statistical efficacy, and reduce the wrong  
46 conclusion caused by the small sample size.<sup>20</sup> The aim of this study was to explore the  
47 prognostic value of ki67 as a marker in patients with NMIBC treated with BCG.  
48  
49 Based on the literature search, this study was the first meta-analysis to evaluate the  
50 prognostic value of ki67 in patients with NMIBC treated with BCG.  
51  
52  
53  
54  
55

## ***Methods***

This meta-analysis was performed according to the Preferred Reporting Items for Systematic Reviews and Meta-Analyses (PRISMA) statement (**Table S1**).<sup>21</sup> The present meta-analysis did not need the approval because all the enrolled published studies were approved by the ethics committee in their research institute.

### ***Literature retrieval strategy***

The comprehensive literature search was performed on Web of Science, PubMed, Cochrane Library, and Embase databases for relevant studies. The last quest was updated on May 24, 2017, with hand-searching to identify any potentially eligible studies that might have been missed. The following search strategy was adopted for each database: ("Urinary Bladder Neoplasms"[Mesh] OR "bladder cancer" OR "bladder carcinoma" OR " bladder tumor ") AND ("BCG Vaccine"[Mesh] OR "BCG" OR "Bacillus Calmette–Guérin") AND ("ki67 antigen "[Mesh] OR " ki-67" OR " ki67" OR " MBI-1"). Filters were as follows: retrospective, array research, clinical trial, controlled clinical trial, and randomized controlled trial. Free word retrieval strategy was used. The enrolled contents included the reference lists and relevant suggestive references while searching (File S1).

### ***Inclusion and exclusion criteria***

The inclusion criteria were as follows: (1) prospective or retrospective published studies evaluating the prognostic relationship between the expression of ki67 and NMIBC treated with BCG; (2) the expression of ki67 in tissues detected by immunohistochemistry analysis; (3) hazard ratio (HR) and 95% confidence interval (95% CI) directly obtained from the published studies; and (4) published English studies. The exclusion criteria were as follows: (1) review, systematic evaluation, case

1  
2  
3 report, editorial, and specialist experience; (2) studies with no human subjects; and (3)  
4 published studies in which data could not be extracted or those having wrong data.  
5

### 6 7 ***Data extraction and evaluation of literature quality***

8  
9 Based on the aforementioned criteria, two reviewers independently screened the  
10 published studies by reading titles and abstracts and got preliminary conclusions. If  
11 the conclusions were not consistent, the literature was discussed by all the authors to  
12 decide its enrollment. The relevant information of the enrolled published studies was  
13 extracted, such as first author, publication time, research country, sex, case number,  
14 age, follow-up date, disease stage, cutoff values, recurrence-free survival (RFS), and  
15 progression-free survival (PFS). The Newcastle–Ottawa Scale (NOS) was used to  
16 evaluate the quality of all the published studies.<sup>22</sup> Scores 0–3, 4–5, and 6–8 were  
17 accepted as low, medium, and high quality, respectively.  
18  
19  
20  
21  
22  
23  
24  
25  
26  
27

### 28 29 ***Statistical methods***

30  
31 The measuring time and method of ki67 complied with the standard of clinical routine  
32 and pathological examination. Tumor tissue samples were taken in accordance with  
33 the standard surgical procedure and used for immunohistochemical analysis. RFS and  
34 PFS were the traditionally used statistical parameters. PFS was defined as the time  
35 from the beginning of treatment to the first progression. RFS was defined as the time  
36 from the removal of the lesion (or the randomization of the clinical trial) until the  
37 recurrence or death of the tumor. The impact of the expression of ki67 on survival was  
38 quantified using the combined HRs and 95% CIs. The HR and 95% CI of each study  
39 were directly extracted from each original published study. Besides, the Parmar and  
40 Tierney's<sup>23</sup> method was used to extract the data because some of the published studies  
41 did not directly provide HR and 95% CI. For example, some studies provided only the  
42 survival curve. In this meta-analysis, the DerSimonian–Laird random-effects model<sup>24</sup>  
43  
44  
45  
46  
47  
48  
49  
50  
51  
52  
53  
54  
55  
56

1  
2  
3 was used because when the heterogeneity was large, only the random-effects model  
4 could be suitably used. Similar to traditional methods, HR >1 was considered as the  
5 prognostic risk factor for the overexpression of ki67, and HR <1 was a protective  
6 factor. 95% CI <1 indicated a statistically significant difference in the relationship  
7 between the overexpression of ki67 and prognosis.  
8

9  
10  
11 The heterogeneity was calculated according to chi-square-based Q test and  $I^2$   
12 statistic.<sup>25</sup> The heterogeneity was judged using the  $I^2$  value (low heterogeneity:  $I^2$   
13 <25%; moderate heterogeneity:  $I^2 = 25\%–50\%$ ; large heterogeneity:  $I^2 >50\%$ ).  
14 Besides, A  $P$  value >0.05 was considered as low heterogeneity. Then, the subgroup  
15 analysis based on regions, sample size, follow-up period, tumor grading, cutoff value,  
16 publication time, and patient age was performed. A value of 1% was considered to be  
17 a statistically significant level in the subgroup analysis. A Galbraith plot was used to  
18 search published studies with heterogeneity<sup>26</sup>, and the meta-analysis was performed  
19 again after excluding these published studies. Meanwhile, the factors causing  
20 heterogeneity were also explored using the residual maximum likelihood  
21 (REML)-based random-effects meta-regression analysis.<sup>27</sup> All the statistical analyses  
22 were performed using the Stata12.0 software (StataCorp, TX, USA), and the  
23 two-sided test was used to evaluate the  $P$  value.  
24  
25  
26  
27  
28  
29  
30  
31  
32  
33  
34  
35  
36  
37  
38  
39  
40

#### 41 ***Evaluation of publication bias***

42 Begg's plot and Egger's test method were used to find the possible publication bias. A  
43  
44  
45  
46  $P$  value <0.05 was considered to indicate publication bias.  
47  
48  
49

#### 50 ***Results***

##### 51 ***Literature screening***

52  
53  
54 A total of 97 published studies were retrieved. Furthermore, 68 of them were excluded  
55  
56

1  
2  
3 after duplicates were removed and records screened, and 18 were excluded after  
4  
5 reading the full text (10 published studies from which HR and 95% CI could not be  
6  
7 obtained, 2 non-English studies, and 6 that did not use ki67 detection). Finally, 11  
8  
9 published studies were enrolled in the meta-analysis (**Figure 1**).

### 11 ***Basic characteristics and quality evaluation of enrolled published studies***

12  
13 The enrolled 11 published studies were published between 1997 and 2013, and the  
14  
15 countries included Italy, South Korea, Spain, Germany, New Zealand, Canada,  
16  
17 Portugal, and France. The largest sample size was 309, and the smallest one was 32. A  
18  
19 total of 1321 patients were enrolled in this study. The follow-up period was more than  
20  
21 36 months, and the longest was 229 months. T1 was the main tumor grading, and the  
22  
23 cutoff value ranged from 10.4% to 40%. Seven published studies reported patients'  
24  
25 RFS, and nine reported PFS (**Table 1**). One literature was scored as 6 star by NOS,  
26  
27 seven as 7 star, and three as 8 star. The median of the NOS score was 7 (**Table 2**).



**Table 1.** Main characteristics of all studies included in this meta-analysis

| Study                         | Year | Country             | Male/<br>Female | No. of<br>patients | Age<br>(year)  | Follow-up<br>(month) | Stage     | Cutoff | Survival<br>analysis |
|-------------------------------|------|---------------------|-----------------|--------------------|----------------|----------------------|-----------|--------|----------------------|
| Oderda <sup>16</sup>          | 2013 | Italy               | 166/26          | 192                | 73.2 (SD 11.9) | 100 (2–229)          | All NMIBC | 20%    | RFS                  |
| Park <sup>14</sup>            | 2013 | Korea               | 53/8            | 61                 | 66 (31–85)     | 60 (6–217)           | T1G3      | 10.4%  | RFS/PFS              |
| Quintero <sup>28</sup>        | 2013 | Spain               | 143/21          | 164                | 61 (29–93)     | 75 (60–144)          | Ta        | 13%    | PFS                  |
| Bertz <sup>12</sup>           | 2012 | Germany             | 237/72          | 309                | 71.7 (38–87)   | 49 (5–172)           | pT1       | 15%    | RFS/PFS              |
| van Rhijn <sup>29</sup>       | 2012 | Netherlands, Canada | 105/24          | 129                | 68.8 (SD 9.9)  | 78 (39.6–110.4)      | T1        | 25%    | RFS/PFS              |
| Burger <sup>30</sup>          | 2007 | Germany             | 45/21           | 71                 | 71 (52–94)     | 39 (1–133)           | T1/Ta     | 15%    | RFS                  |
| Queipo-zaragoza <sup>31</sup> | 2007 | Spain               | 71/12           | 83                 | 68.1 (SD 8.5)  | All >36              | T1G3      | 40%    | PFS                  |
| Lopez-Beltran <sup>32</sup>   | 2004 | Spain               | 49/2            | 51                 | 69.96 (49–89)  | 63.82 (60–144)       | T1G3      | 13%    | PFS                  |
| Santos <sup>33</sup>          | 2003 | Portugal            | 115/44          | 159                | 66 (21–88)     | 46.5 (4–123)         | pTa/pT1   | 18%    | RFS/PFS              |
| Blanchet <sup>34</sup>        | 2001 | France              | -               | 70                 | 62.6 (21–84)   | 64 (12–111)          | pT1/pTa   | 13%    | PFS                  |
| Lee <sup>35</sup>             | 1997 | Korea               | 28/4            | 32                 | 57.1 (30–81)   | All >24              | T1G2-3    | 20%    | RFS                  |

NMIBC, Non-muscle-invasive bladder cancer; no., number; PFS, progression-free survival; RFS, recurrence-free survival.

**Table 2.** Quality of the included studies assessed by NOS

| Study                         | Selection                    |                             | Comparability         |                        | Exposure                     |                           | Non-response rate | Scores |                                                 |
|-------------------------------|------------------------------|-----------------------------|-----------------------|------------------------|------------------------------|---------------------------|-------------------|--------|-------------------------------------------------|
|                               | Adequate definition of cases | Representativeness of cases | Selection of controls | Definition of controls | Control for important factor | Ascertainment of exposure |                   |        | Same method to ascertain for cases and controls |
| Oderda <sup>16</sup>          | —                            | ☆                           | ☆                     | ☆                      | ☆☆                           | ☆                         | ☆                 | ☆      | 8                                               |
| Park <sup>14</sup>            | —                            | ☆                           | ☆                     | —                      | ☆☆                           | ☆                         | ☆                 | ☆      | 7                                               |
| Quintero <sup>28</sup>        | —                            | ☆                           | ☆                     | —                      | ☆☆                           | ☆                         | ☆                 | —      | 6                                               |
| Bertz <sup>12</sup>           | —                            | ☆                           | ☆                     | —                      | ☆☆                           | ☆                         | ☆                 | ☆      | 7                                               |
| van Rhijn <sup>29</sup>       | —                            | ☆                           | ☆                     | —                      | ☆☆                           | ☆                         | ☆                 | ☆      | 7                                               |
| Burger <sup>30</sup>          | ☆                            | ☆                           | ☆                     | —                      | ☆☆                           | ☆                         | ☆                 | —      | 7                                               |
| Queipo-zaragoza <sup>31</sup> | —                            | ☆                           | ☆                     | —                      | ☆☆                           | ☆                         | ☆                 | ☆      | 7                                               |
| Lopez-Beltran <sup>32</sup>   | —                            | ☆                           | ☆                     | ☆                      | ☆☆                           | ☆                         | ☆                 | ☆      | 8                                               |
| Santos <sup>33</sup>          | —                            | ☆                           | ☆                     | —                      | ☆☆                           | ☆                         | ☆                 | ☆      | 7                                               |
| Blanchet <sup>34</sup>        | —                            | ☆                           | ☆                     | ☆                      | ☆☆                           | ☆                         | ☆                 | ☆      | 8                                               |
| Lee <sup>35</sup>             | —                            | ☆                           | ☆                     | —                      | ☆☆                           | ☆                         | ☆                 | ☆      | 7                                               |

### ***Influence of the expression of ki67 on RFS***

Seven published studies reported the expression of ki67 and PFS results of patients with NMIBC treated with BCG. The meta-analysis indicated that ki67 had no statistically significant association with RFS (HR: 1.331; 95% CI: 0.980–1.809), and no heterogeneity among the enrolled studies was reported ( $I^2 = 36.7%$ ,  $P = 0.148$ ) (**Figure 2A**). The subgroup analysis was performed based on the regions, sample size, follow-up period, stage, cutoff value, publication time, and age. Meanwhile, all the original published analyses on the association between the expression of ki67 and RFS in patients with NMIBC treated with BCG were multivariate, and the HRs were adjusted. The stratification analysis by region indicated that ki67 was also significantly associated with RFS in Caucasians and a follow-up period shorter than 6 months. (HR: 1.441, 95% CI: 1.014–2.047; HR: 1.853, 95% CI: 1.316–2.607) (**Table 3**).

**Table 3.** Subgroup results of RFS and heterogeneity test

| Variables          | Analysis number | HR (95% CI)         | Heterogeneity test |          |                           |
|--------------------|-----------------|---------------------|--------------------|----------|---------------------------|
|                    |                 |                     | <i>Q</i>           | <i>P</i> | <i>I</i> <sup>2</sup> (%) |
| Total RFS          | 7               | 1.331 (0.980–1.809) | 9.48               | 0.148    | 36.7                      |
| Region             |                 |                     |                    |          |                           |
| Asian              | 2               | 0.892 (0.454–1.752) | 0.32               | 0.570    | 0.0                       |
| Caucasian          | 5               | 1.441 (1.014–2.047) | 7.52               | 0.111    | 46.8                      |
| Sample size        |                 |                     |                    |          |                           |
| >100               | 4               | 1.466 (0.986–2.181) | 7.44               | 0.059    | 59.7                      |
| ≤100               | 3               | 0.959 (0.534–1.725) | 0.51               | 0.777    | 0.0                       |
| Follow-up (month)  |                 |                     |                    |          |                           |
| ≥60                | 3               | 1.036 (0.758–1.415) | 0.79               | 0.674    | 0.0                       |
| <60                | 4               | 1.853 (1.316–2.607) | 2.62               | 0.453    | 0.0                       |
| Stage              |                 |                     |                    |          |                           |
| All NMIBC          | 3               | 1.575 (0.915–2.711) | 4.44               | 0.109    | 54.9                      |
| Others             | 4               | 1.153 (0.821–1.620) | 3.21               | 0.360    | 6.6                       |
| Cutoff             |                 |                     |                    |          |                           |
| 15%                | 2               | 1.625 (0.963–2.743) | 0.31               | 0.575    | 0.0                       |
| Others             | 5               | 1.252 (0.839–1.869) | 8.56               | 0.073    | 53.3                      |
| Publication year   |                 |                     |                    |          |                           |
| ≥2012              | 4               | 1.164 (0.874,1.550) | 3.20               | 0.362    | 6.3                       |
| <2012              | 3               | 1.774 (1.046,3.008) | 2.57               | 0.277    | 22.1                      |
| Patient age (year) |                 |                     |                    |          |                           |
| ≥70                | 3               | 1.352 (0.955–1.913) | 1.16               | 0.559    | 0.0                       |
| <70                | 4               | 1.256 (0.717–2198)  | 8.32               | 0.040    | 63.9                      |

NMIBC, Non-muscle-invasive bladder cancer; RFS, recurrence-free survival.

### ***Influence of the expression of ki67 on PFS***

A total of nine published studies reported the expression of ki67 and PFS results of patients in NMIBC treated with BCG. The meta-analysis indicated that ki67 had no statistically significant association with RFS (HR:2.567, 95% CI: 1.562–4.219), and the overexpression of ki67 was the risk factor for PFS. Statistically significant heterogeneity was found among all the included studies ( $I^2 = 55.6\%$ ,  $P = 0.021$ ) (**Figure 2B**). The subgroup analysis was performed based on the regions, sample size, follow-up period, stage, cutoff value, publication time, and age. However, the data extracted from six original published analyses on the association between the expression of ki67 and PFS in patients with NMIBC treated with BCG were multivariate with adjusted HRs, whereas the data from three original published analyses were univariate with unadjusted HRs. In the stratified analyses by the region, sample size, follow-up time, stage, cutoff, publication year, and patient age, significant associations were observed in the studies with Caucasian subgroup, sample size >100, follow-up period <6 months, other cutoffs, and two subgroups based on age (HR: 1.97, 95% CI: 1.04–3.74; HR: 2.37, 95% CI: 1.23–4.55; HR:2.49, 95% CI: 1.19–5.21; HR: 2.515, 95% CI: 1.382–4.576; HR: 2.800, 95% CI: 1.447–5.418; and HR: 2.654, 95% CI: 1.381–5.100, respectively). However, significant associations were also observed in both multivariate and univariate analyses (HR: 2.10, 95% CI: 1.07–1.12; HR: 2.80, 95%CI: 1.65–7.85, respectively), and the effect size suggested the same outcomes (HR: 2.567, 95% CI: 1.562–4.219) (**Table 4**).

**Table 4.** Subgroup results of PFS and heterogeneity test

| Variables               | Analysis number | HR (95% CI)           | Heterogeneity test |          |                           |
|-------------------------|-----------------|-----------------------|--------------------|----------|---------------------------|
|                         |                 |                       | <i>Q</i>           | <i>P</i> | <i>I</i> <sup>2</sup> (%) |
| Total PFS               | 9               | 2.567 (1.562–4.219)   | 18.1               | 0.021    | 55.6                      |
| Region                  |                 |                       |                    |          |                           |
| Asian                   | 1               | 0.421 (0.084–2.114)   | 0.00               |          |                           |
| Caucasian               | 8               | 2.883 (1.830–4.544)   | 12.99              | 0.072    | 46.1                      |
| Sample size             |                 |                       |                    |          |                           |
| >100                    | 5               | 2.559 (1.372–4.774)   | 9.26               | 0.055    | 56.8                      |
| ≤100                    | 4               | 2.536 (0.943–6.818)   | 8.75               | 0.033    | 65.7                      |
| Follow-up (month)       |                 |                       |                    |          |                           |
| ≥60                     | 6               | 2.153 (0.984–4.710)   | 13.08              | 0.023    | 61.8                      |
| <60                     | 3               | 3.158 (1.774–5.623)   | 3.56               | 0.169    | 43.8                      |
| Stage                   |                 |                       |                    |          |                           |
| All NMIBC               | 3               | 4.673 (1.938–11.264)  | 3.29               | 0.193    | 39.2                      |
| Others                  | 6               | 2.044 (1.213–15.040)  | 9.58               | 0.088    | 47.8                      |
| Cut off                 |                 |                       |                    |          |                           |
| 15%                     | 1               | 2.800 (1.447–5.418)   | 0.00               |          |                           |
| Others                  | 8               | 2.515 (1.382–4.576)   | 17.92              | 0.012    | 60.9                      |
| Publication year        |                 |                       |                    |          |                           |
| ≥2012                   | 5               | 1.685 ( 0.883,3.215 ) | 8.04               | 0.090    | 50.2                      |
| <2012                   | 4               | 4.176 ( 2.209,7.884 ) | 5.00               | 0.172    | 40.0                      |
| Patient age (year)      |                 |                       |                    |          |                           |
| ≥70                     | 2               | 2.519 (1.377–4.606)   | 0.60               | 0.438    | 0.0                       |
| <70                     | 7               | 2.654 (1.381–5.100)   | 17.40              | 0.008    | 65.5                      |
| Multivariate/Univariate |                 |                       |                    |          |                           |
| Multivariate            | 6               | 2.101 (1.070–1.121)   | 13.83              | 0.031    | 63.8                      |
| Univariate              | 3               | 2.803 (1.652–7.856)   | 3.38               | 0.001    | 40.8                      |

1  
2  
3  
4  
5  
6  
7  
8  
9  
10  
11  
12  
13  
14  
15  
16  
17  
18  
19  
20  
21  
22  
23  
24  
25  
26  
27  
28  
29  
30  
31  
32  
33  
34  
35  
36  
37  
38  
39  
40  
41  
42  
43  
44  
45  
46  
47

NMIBC, Non-muscle-invasive bladder cancer; PFS, progression-free survival.

For peer review only

### ***Galbraith plot***

Using Galbraith plot (**Figure 3A**), it was found that the study by Santos<sup>33</sup> was the main reason for the heterogeneity of RFS. After the aforementioned study was excluded, the remaining RFS studies had no significant heterogeneity according to the new meta-analysis ( $I^2 = 0.0\%$ ,  $P = 0.667$ ). However, the expression of ki67 still had no statistically significant association with RFS (HR: 1.161, 95% CI: 0.896–1.504) (**Figure S1**). Using the Galbraith plot (**Figure 3B**), it was found that the study by Santos,<sup>33</sup> Park,<sup>14</sup> and van Rhijn<sup>29</sup> were the main reason for the heterogeneity of PFS. After these studies were excluded, the remaining RFS studies had no significant heterogeneity according to the new meta-analysis ( $I^2 = 0.0\%$ ,  $P = 0.497$ ). The expression of ki67 still had a statistically significant association with PFS (HR: 2.922, 95% CI: 2.002–4.266) (**Figure S2**).

### ***Meta-regression analysis***

The meta-regression analysis indicated that the factors influencing heterogeneity (publication time, research region, sample size, stage, cutoff value, age, and follow-up period) might not be the reason for RFS heterogeneity. Publication time was the reason for heterogeneity of PFS ( $P = 0.036$ ), but other factors were not (**Table S2**).

### ***Publication bias***

The funnel plot (**Figure 4A**) was basically symmetrical for RFS. The results of Begg's test and Egger's test showed  $P$  (Begg's) = 0.761,  $P$  (Egger's) = 0.601. The funnel plot (**Figure 4B**) was also basically symmetrical for PFS. The results of Begg's test and Egger's test showed  $P$  (Begg's) = 0.917,  $P$  (Egger's) = 0.964.

### ***Discussion***

A total of 11 published studies with 1321 cases complying with the inclusion criteria



1  
2  
3 were enrolled in this meta-analysis. The results of the meta-analysis indicated that the  
4  
5 expression of ki67 had no statistically significant association with RFS, but it was  
6  
7 significantly associated with PFS. The overexpression of ki67 was the risk factor for  
8  
9 PFS. It suggested that ki67 was the prognostic predictive marker in patients with  
10  
11 NMIBC treated with BCG. Besides, the aforementioned conditions did not change  
12  
13 after excluding the published studies, possibly leading to heterogeneity and  
14  
15 reperforming of the meta-analysis. It further proved that the result of the  
16  
17 aforementioned meta-analysis was stable, that is, the overexpression of ki67 was the  
18  
19 risk factor for PFS. In the Caucasian subgroup for PFS, racial classification and  
20  
21 regional factors might be crucial in the prognosis of patients with NMIBC after BCG  
22  
23 therapy. This might be related to the existence of different drug gene susceptibilities in  
24  
25 people belonging to different races and living areas. The two subgroups were based on  
26  
27 age in PFS, suggesting that age might be the important factor influencing the  
28  
29 prognosis of bladder cancer. This also complies with our clinical practice. The elder  
30  
31 the patient, the worse the prognosis. Several factors led to heterogeneity in the  
32  
33 aforementioned subgroup analysis: (1) Due to the influence of race and environment,  
34  
35 the documents included in this study came from different regions and countries. A  
36  
37 large number of studies confirmed the differences in disease susceptibility between  
38  
39 ethnic groups and regions. (2) Differences existed in the operation of health care  
40  
41 workers in TUR and BGC intravesical immunotherapy because of different regions  
42  
43 and different clinicians, such as surgical clearance of the tumor. The tumor with a  
44  
45 broad base surface is often not easy to remove completely, which also depends on the  
46  
47 surgeon's experience and surgical skills. In addition, the quality of BCG  
48  
49 manufacturers may vary from region to region. (3) Different literature might include  
50  
51 the bias of research object, research design, measuring instrument, and so on.  
52  
53  
54  
55  
56  
57  
58  
59  
60

1  
2  
3 However, in general, heterogeneity did not affect the conclusion. Besides, the  
4 meta-regression analysis indicated publication time as the reason for PFS  
5 heterogeneity. It might be related to the improvement in testing technology, research  
6 level, and the quality and number of published studies, facilitating follow-up studies.  
7  
8 As all the original data extracted from published studies on the association between  
9 the expression of ki67 and RFS in patients with NMIBC treated with BCG were  
10 multivariate, the result was considered to be precise because the HRs were adjusted,  
11 excluding the confounding factors such as age and gender. However, the original data  
12 extracted from published analyses on the association between the expression of ki67  
13 and PFS were both multivariate and univariate. It was believed that the  
14 aforementioned adjustments did not have a significant impact on meta-analyses.  
15  
16 Besides, according to the funnel plot, Begg's test and Egger's test, the enrolled studies  
17 had no statistically significant publication bias. Thus, the reliability of the present  
18 meta-analysis was high.  
19  
20  
21  
22  
23  
24  
25  
26  
27  
28  
29  
30  
31  
32

33 In 2016, the European Association of Urology (EUA)<sup>36</sup> recommended a scoring  
34 system for the prognostic evaluation of NMIBC based on six clinical and pathological  
35 factors proposed by the European Organization for the Research and Treatment of  
36 Cancer-Genito-Urinary Cancer Group (EORTC), including number of tumors, tumor  
37 size, prior recurrence rate, T category, presence of concurrent carcinoma in situ, and  
38 tumor grade (**Table S3**). The tumors were categorized into low-risk tumors,  
39 intermediate-risk tumors, and high-risk tumors using this assessment system to  
40 evaluate the prognosis. For the patients after BCG therapy, the EUA recommended  
41 another risk calculator developed by the Club Urologico Espanol de Tratamiento  
42 Oncologico (CUETO) and the EORTC. This calculator was based on gender, age,  
43 recurrent tumor, number of tumors, T category, associated Tis, and grade. The  
44  
45  
46  
47  
48  
49  
50  
51  
52  
53  
54  
55  
56  
57  
58  
59  
60

1  
2  
3 CUETO risk calculator can be achieved at <http://www.aeu.es/Cueto.html>. The  
4  
5 recommended level was B grade for the two scales for patients with NMIBC, whether  
6  
7 used alone or combined. The two scales could be used together in the clinic. When  
8  
9 using the CUETO scale, the calculated recurrent risk was lower than that from the  
10  
11 EORTC scale,<sup>37</sup> which might be related to the special design in the CUETO scale for  
12  
13 the patients receiving BCG intravesical immunotherapy. However, the scoring system  
14  
15 only depending on clinical and pathological factors could not accurately evaluate the  
16  
17 prognosis of patients with bladder cancer in T1 stage due to the independence of  
18  
19 disease condition in each patient.<sup>38</sup> The markers regulated at the genetic level may  
20  
21 judge the prognosis of patients with bladder cancer with the development of precision  
22  
23 medicine. A reliable marker helps in recognizing the patients who have failed in BCG  
24  
25 intravesical immunotherapy with high risk in time. Hence, these patients can undergo  
26  
27 radical cystectomy or other treatments in time. Unfortunately, no prognostic marker  
28  
29 has been applied in clinic currently. The results of this study potentially help to  
30  
31 remind clinicians that patients with high expression of ki67 may need to develop more  
32  
33 personalized follow-up plans, such as shorter follow-up and cystoscopy cycles.  
34  
35 Patients with high risk of clinical evaluation of the guidelines and overexpression of  
36  
37 ki67 may need to promptly change the treatment strategy.

38  
39  
40  
41 Ki67 is a nucleoprotein that can be detected in the cell cycles except G0 phase.<sup>39</sup> The  
42  
43 expression of human ki67 protein is closely related to proliferation. Therefore, it is an  
44  
45 ideal marker to confirm the growth fraction of specific cell colonies.<sup>40</sup> Ki67 is a  
46  
47 widely known amplified biomarker. The ki67 monoclonal antibody can be detected by  
48  
49 the immunohistochemical method.<sup>41</sup> Ki67 has been proved to be a good proliferation  
50  
51 marker in different cancers, including bladder cancer.<sup>42</sup>

52  
53  
54 So far, some meta-analyses have studied the effect of ki67 on the prognostic quality of

1  
2  
3 life of patients with esophageal cancer, breast cancer, epithelial ovarian cancer, and so  
4 on.<sup>43-45</sup> Some studies have also focused on the other aspects of bladder cancer. Using  
5 meta-analysis, Luo<sup>46</sup> believed that a high reactivity of ki67 could predict the poor  
6 prognosis in patients with bladder cancer. The univariate analysis showed that  
7 cancer-specific survival, disease-free survival, overall survival , PFS, and RFS had a  
8  
9 significant association with poor prognosis in patients with a high reactivity of ki67.  
10  
11 However, this study enrolled all types of bladder tumors and all the therapies for  
12 NMIBC. Currently, the bladder cancer treated in the clinic is mainly NMIBC. Thus,  
13  
14 most of the applied therapy is TUR combined with installations of chemotherapy or  
15 BCG intravesical immunotherapy based on the patients' conditions. Therefore, this  
16  
17 analysis had a certain limitation in the prognosis of patients with NMIBC after BCG  
18 intravesical immunotherapy.

19  
20  
21 Currently, few evidence-based studies focused on the prognosis of patients with  
22 NMIBC after BCG intravesical immunotherapy. Using meta-analysis, Zhou<sup>47</sup>  
23 analyzed the association between the expression of p53 and quality of life of patients  
24 with NMIBC after BCG intravesical immunotherapy. They believed that the  
25 overexpression of p53 in patients with NMIBC treated with BCG might be associated  
26 with RFS, especially in Asian population. Similarly, Du<sup>48</sup> also performed the  
27 meta-analysis on the relationship between p53 status and NMIBC in T1 stage and  
28  
29 believed that the overexpression of p53 might be related to the development of  
30 NMIBC. The present study indicated that the overexpression of ki67 was the risk  
31 factor for PFS, but the expression of ki67 had no statistically significant association  
32 with RFS. P53 is the most common inactivated tumor suppressor gene in tumor  
33  
34 cells.<sup>49</sup> The inactivation of p53 may cause cell abnormal hyperplasia and  
35  
36  
37  
38  
39  
40  
41  
42  
43  
44  
45  
46  
47  
48  
49  
50  
51  
52  
53  
54

1  
2  
3 cancerization. The variation in p53 results in enhanced proliferation, invasion, and  
4  
5 metabolism.<sup>50</sup> The increase in the expression of ki67 , as cell proliferation marker  
6  
7  
8 suggests enhanced proliferation.<sup>40</sup> As a tumor suppressor gene with complicated  
9  
10 function, p53 has a wider range of effects. The accuracy in the prediction of quality of  
11  
12 life may not be more appropriate compared with ki67. The genetic difference between  
13  
14 Asians and Caucasians suggests that different prediction systems should be built for  
15  
16 different races. Besides, p27, E2F1, ezrin, and CK20 were also studied in other  
17  
18 investigations for predicting NMIBC prognosis, which could be explored further  
19  
20 comparing the advantages of using them alone or combined.  
21  
22

23 However, this study still had some limitations. First, the enrolled published studies  
24  
25 involved different populations, used similar detection equipment, and had different  
26  
27 cutoff values. All these reasons might have led to heterogeneity. Further, the sample  
28  
29 size of the meta-analysis also limited its significance. Second, the meta-analysis  
30  
31 included English published studies. Although Begg's test and Egger's test did not  
32  
33 suggest publication bias, this study was still influenced by some bias. Finally, the  
34  
35 surgical skills were different in different published studies, affecting the judgment  
36  
37 regarding the effectiveness of BCG.  
38  
39

### 40 **Conclusions**

41  
42 The overexpression of ki67 was the risk factor for PFS in patients with NMIBC after  
43  
44 TUR and BCG intravesical immunotherapy, but the relationship between the  
45  
46 expression of ki67 and RFS was not statistically significant. Owing to the  
47  
48 aforementioned limitations of the present study, RCTs with large sample size are still  
49  
50 required to validate the results.  
51  
52  
53  
54  
55  
56  
57  
58  
59  
60

### ***Authors' contributions***

YHH, NW, and XFZ conceived and designed the experiments. XC and YSD extracted the data. YHH, NW, and XFZ analyzed the data. ZSD, JFW, and XC contributed reagents/materials/analysis tools. YHH and NW wrote the paper. XFZ critically revised the report.

### ***Funding***

This study was supported by grants from the International S&T Cooperation Program of China (ISTCP) (Grant No.2014DFE30010).

### ***Disclaimer***

The contents of the present study are solely the responsibility of the author. The funders had no role in study design, data collection and analysis, decision to publish, or preparation of the manuscript.

### ***Competing interests***

None declared.

### ***Data sharing statement***

Extra data can be accessed via the Dryad data repository at <http://datadryad.org/> with the <https://doi.org/10.5061/dryad.hf06q72>

### ***References***

1. Ploeg M, Aben KK, Kiemeny LA. The present and future burden of urinary bladder cancer in the world. *World J Urol* 2009;**27**:289-93. doi:10.1007/s00345-009-0383-3.
2. Torre LA, Bray F, Siegel RL, *et al*. Global cancer statistics, 2012. *CA Cancer J Clin* 2015;**65**:87-108. doi:10.3322/caac.21262.
3. Ro JY, Staerkel GA, Ayala AG. Cytologic and histologic features of superficial

- 1  
2  
3 bladder cancer. *Urol Clin North Am* 1992;**19**:435-53.
- 4  
5 4. Woldu SL, Bagrodia A, Lotan Y. Guideline of guidelines: non-muscle-invasive  
6  
7 bladder cancer. *BJU Int* 2017;**119**:371-80. doi:10.1111/bju.13760.
- 8  
9 5. Brausi M, Collette L, Kurth K, *et al.* Variability in the recurrence rate at first  
10  
11 follow-up cystoscopy after TUR in stage Ta T1 transitional cell carcinoma of the  
12  
13 bladder: a combined analysis of seven EORTC studies. *Eur Urol* 2002;**41**:523-31.
- 14  
15 6. Jarvinen R, Kaasinen E, Sankila A, *et al.* Long-term efficacy of maintenance  
16  
17 bacillus Calmette-Guerin versus maintenance mitomycin C instillation therapy in  
18  
19 frequently recurrent TaT1 tumours without carcinoma in situ: a subgroup analysis of  
20  
21 the prospective, randomised FinnBladder I study with a 20-year follow-up. *Eur Urol*  
22  
23 2009;**56**:260-5. doi:10.1016/j.eururo.2009.04.009.
- 24  
25 7. Sylvester RJ, Brausi MA, Kirkels WJ, *et al.* Long-term efficacy results of EORTC  
26  
27 genito-urinary group randomized phase 3 study 30911 comparing intravesical  
28  
29 instillations of epirubicin, bacillus Calmette-Guerin, and bacillus Calmette-Guerin  
30  
31 plus isoniazid in patients with intermediate- and high-risk stage Ta T1 urothelial  
32  
33 carcinoma of the bladder. *Eur Urol* 2010;**57**:766-73.  
34  
35 doi:10.1016/j.eururo.2009.12.024.
- 36  
37 8. Gual Frau J, Palou J, Rodriguez O, *et al.* Failure of Bacillus Calmette-Guerin  
38  
39 therapy in non-muscle-invasive bladder cancer: Definition and treatment options.  
40  
41  
42  
43  
44 *Arch Esp Urol* 2016;**69**:423-33.
- 45  
46 9. Boyd LA. Intravesical Bacillus Calmette-Guerin for treating bladder cancer. *Urol*  
47  
48 *Nurs* 2003;**23**:189-91, 99; quiz 92.
- 49  
50 10. Alkhateeb SS, Neill M, Bar-Moshe S, *et al.* Long-term prognostic value of the  
51  
52 combination of EORTC risk group calculator and molecular markers in  
53  
54 non-muscle-invasive bladder cancer patients treated with intravesical Bacille  
55  
56

- 1  
2  
3 Calmette-Guerin. *Urol Ann* 2011;**3**:119-26. doi:10.4103/0974-7796.84954.
- 4  
5 11. Mariappan P, Smith G. A surveillance schedule for G1Ta bladder cancer allowing  
6  
7 efficient use of check cystoscopy and safe discharge at 5 years based on a 25-year  
8  
9 prospective database. *J Urol* 2005;**173**:1108-11.  
10  
11 doi:10.1097/01.ju.0000149163.08521.69.
- 12  
13 12. Bertz S, Otto W, Denzinger S, *et al.* Combination of CK20 and Ki-67  
14  
15 immunostaining analysis predicts recurrence, progression, and cancer-specific  
16  
17 survival in pT1 urothelial bladder cancer. *Eur Urol* 2014;**65**:218-26.  
18  
19 doi:10.1016/j.eururo.2012.05.033.
- 20  
21 13. Kim K, Cho YM, Park BH, *et al.* Histological and immunohistochemical markers  
22  
23 for progression prediction in transurethrally resected high-grade non-muscle invasive  
24  
25 bladder cancer. *Int J Clin Exp Pathol* 2015;**8**:743-50.
- 26  
27 14. Park J, Song C, Shin E, *et al.* Do molecular biomarkers have prognostic value in  
28  
29 primary T1G3 bladder cancer treated with bacillus Calmette-Guerin intravesical  
30  
31 therapy? *Urol Oncol* 2013;**31**:849-56. doi:10.1016/j.urolonc.2011.06.004.
- 32  
33 15. Kruger S, Thorns C, Stocker W, *et al.* Prognostic value of MCM2  
34  
35 immunoreactivity in stage T1 transitional cell carcinoma of the bladder. *Eur Urol*  
36  
37 2003;**43**:138-45.
- 38  
39 16. Oderda M, Ricceri F, Pisano F, *et al.* Prognostic factors including Ki-67 and p53  
40  
41 in Bacillus Calmette-Guerin-treated non-muscle-invasive bladder cancer: a  
42  
43 prospective study. *Urol Int* 2013;**90**:184-90. doi:10.1159/000343431.
- 44  
45 17. Zlotta AR, Noel JC, Fayt I, *et al.* Correlation and prognostic significance of p53,  
46  
47 p21WAF1/CIP1 and Ki-67 expression in patients with superficial bladder tumors  
48  
49 treated with bacillus Calmette-Guerin intravesical therapy. *J Urol* 1999;**161**:792-8.
- 50  
51 18. Saint F, Salomon L, Quintela R, *et al.* Do prognostic parameters of remission  
52  
53  
54  
55  
56



1  
2  
3 versus relapse after Bacillus Calmette-Guerin (BCG) immunotherapy exist?. analysis  
4 of a quarter century of literature. *Eur Urol* 2003;**43**:351-60; discussion 60-1.

5  
6  
7 19. Habuchi T, Marberger M, Droller MJ, *et al.* Prognostic markers for bladder  
8 cancer: International Consensus Panel on bladder tumor markers. *Urology*  
9 2005;**66**:64-74. doi:10.1016/j.urology.2005.08.065.

10  
11  
12 20. Button KS, Ioannidis JP, Mokrysz C, *et al.* Power failure: why small sample size  
13 undermines the reliability of neuroscience. *Nat Rev Neurosci* 2013;**14**:365-76.  
14  
15  
16  
17  
18  
19  
20  
21  
22  
23  
24  
25  
26  
27  
28  
29  
30  
31  
32  
33  
34  
35  
36  
37  
38  
39  
40  
41  
42  
43  
44  
45  
46  
47  
48  
49  
50  
51  
52  
53  
54  
55  
56  
57  
58  
59  
60  
doi:10.1038/nrn3475.

21. Liberati A, Altman DG, Tetzlaff J, *et al.* The PRISMA statement for reporting  
22 systematic reviews and meta-analyses of studies that evaluate health care  
23 interventions: explanation and elaboration. *PLoS Med* 2009;**6**:e1000100.  
24  
25  
26  
27  
28  
29  
30  
31  
32  
33  
34  
35  
36  
37  
38  
39  
40  
41  
42  
43  
44  
45  
46  
47  
48  
49  
50  
51  
52  
53  
54  
55  
56  
57  
58  
59  
60  
doi:10.1371/journal.pmed.1000100.

22. Stang A. Critical evaluation of the Newcastle-Ottawa scale for the assessment of  
31 the quality of nonrandomized studies in meta-analyses. *Eur J Epidemiol*  
32 2010;**25**:603-5. doi:10.1007/s10654-010-9491-z.

23. Parmar MK, Torri V, Stewart L. Extracting summary statistics to perform  
37 meta-analyses of the published literature for survival endpoints. *Stat Med*  
38 1998;**17**:2815-34.

24. DerSimonian R, Laird N. Meta-analysis in clinical trials. *Control Clin Trials*  
43 1986;**7**:177-88.

25. Higgins JP, Thompson SG. Quantifying heterogeneity in a meta-analysis. *Stat Med*  
48 2002;**21**:1539-58. doi:10.1002/sim.1186.

26. Bax L, Ikeda N, Fukui N, *et al.* More than numbers: the power of graphs in  
52 meta-analysis. *Am J Epidemiol* 2009;**169**:249-55. doi:10.1093/aje/kwn340.

27. Xu X, Cheng Y, Li S, *et al.* Dietary carrot consumption and the risk of prostate

- 1  
2  
3 cancer. *Eur J Nutr* 2014;53:1615-1623. doi: 10.1007/s00394-014-0667-2.
- 4  
5 28. Quintero A, Alvarez-Kindelan J, Luque RJ, *et al.* Ki-67 MIB1 labelling index and  
6  
7 the prognosis of primary TaT1 urothelial cell carcinoma of the bladder. *J Clin Pathol*  
8  
9 2006;59:83-8. doi:10.1136/jcp.2004.022939.
- 10  
11 29. van Rhijn BW, Liu L, Vis AN, *et al.* Prognostic value of molecular markers,  
12  
13 sub-stage and European Organisation for the Research and Treatment of Cancer risk  
14  
15 scores in primary T1 bladder cancer. *BJU Int* 2012;110:1169-76.  
16  
17 doi:10.1111/j.1464-410X.2012.10996.x.
- 18  
19 30. Burger M, Denzinger S, Hartmann A, *et al.* Mcm2 predicts recurrence hazard in  
20  
21 stage Ta/T1 bladder cancer more accurately than CK20, Ki67 and histological grade.  
22  
23 *Br J Cancer* 2007;96:1711-5. doi:10.1038/sj.bjc.6603784.
- 24  
25 31. Queipo-Zaragoza JA, Ruiz-Cerda JL, Vera-Donoso CD, *et al.* Prognostic value of  
26  
27 p53, Ki-67, microstaging and microvessel density in pT1G3 bladder tumors: creation  
28  
29 of risk groups for progression. *Scand J Urol Nephrol* 2007;41:283-9.  
30  
31 doi:10.1080/00365590601183055.
- 32  
33 32. Lopez-Beltran A, Luque RJ, Alvarez-Kindelan J, *et al.* Prognostic factors in stage  
34  
35 T1 grade 3 bladder cancer survival: the role of G1-S modulators (p53, p21Waf1,  
36  
37 p27kip1, Cyclin D1, and Cyclin D3) and proliferation index (ki67-MIB1). *Eur Urol*  
38  
39 2004;45:606-12. doi:10.1016/j.eururo.2003.11.011.
- 40  
41 33. Santos L, Amaro T, Costa C, *et al.* Ki-67 index enhances the prognostic accuracy  
42  
43 of the urothelial superficial bladder carcinoma risk group classification. *Int J Cancer*  
44  
45 2003;105:267-72. doi:10.1002/ijc.11049.
- 46  
47 34. Blanchet P, Droupy S, Eschwege P, *et al.* Prospective evaluation of Ki-67 labeling  
48  
49 in predicting the recurrence and progression of superficial bladder transitional cell  
50  
51 carcinoma. *Eur Urol* 2001;40:169-75. doi:49768.
- 52  
53  
54  
55  
56  
57  
58  
59  
60

- 1  
2  
3 35. Lee E, Park I, Lee C. Prognostic markers of intravesical bacillus Calmette-Guerin  
4 therapy for multiple, high-grade, stage T1 bladder cancers. *Int J Urol* 1997;**4**:552-6.  
5  
6  
7 36. Babjuk M, Bohle A, Burger M, *et al.* EAU Guidelines on Non-Muscle-invasive  
8 Urothelial Carcinoma of the Bladder: Update 2016. *Eur Urol* 2017;**71**:447-61.  
9 doi:10.1016/j.eururo.2016.05.041.  
10  
11  
12 37. Fernandez-Gomez J, Madero R, Solsona E, *et al.* Predicting nonmuscle invasive  
13 bladder cancer recurrence and progression in patients treated with bacillus  
14 Calmette-Guerin: the CUETO scoring model. *J Urol* 2009;**182**:2195-203.  
15 doi:10.1016/j.juro.2009.07.016.  
16  
17  
18 38. Kiemeny LA, Witjes JA, Heijbroek RP, *et al.* Predictability of recurrent and  
19 progressive disease in individual patients with primary superficial bladder cancer. *J*  
20 *Urol* 1993;**150**:60-4.  
21  
22  
23 39. Gerdes J, Lemke H, Baisch H, *et al.* Cell cycle analysis of a cell  
24 proliferation-associated human nuclear antigen defined by the monoclonal antibody  
25 Ki-67. *J Immunol* 1984;**133**:1710-5.  
26  
27  
28 40. Scholzen T, Gerdes J. The Ki-67 protein: from the known and the unknown. *J Cell*  
29 *Physiol* 2000;**182**:311-22.  
30 doi:10.1002/(sici)1097-4652(200003)182:3<311::aid-jcp1>3.0.co;2-9.  
31  
32  
33 41. Gerdes J, Li L, Schlueter C, *et al.* Immunobiochemical and molecular biologic  
34 characterization of the cell proliferation-associated nuclear antigen that is defined by  
35 monoclonal antibody Ki-67. *Am J Pathol* 1991;**138**:867-73.  
36  
37  
38 42. Rodriguez-Alonso A, Pita-Fernandez S, Gonzalez-Carrero J, *et al.* p53 and ki67  
39 expression as prognostic factors for cancer-related survival in stage T1 transitional  
40 cell bladder carcinoma. *Eur Urol* 2002;**41**:182-8; discussion 88-9.  
41  
42  
43 43. McCormick Matthews LH, Noble F, Tod J, *et al.* Systematic review and  
44  
45  
46  
47  
48  
49  
50  
51  
52  
53  
54  
55  
56  
57  
58  
59  
60

- 1  
2  
3 meta-analysis of immunohistochemical prognostic biomarkers in resected  
4 oesophageal adenocarcinoma. *Br J Cancer* 2015;**113**:107-18.  
5  
6 doi:10.1038/bjc.2015.179.  
7  
8  
9 44. Gui Y, Xu S, Yang X, *et al*. A meta-analysis of biomarkers for the prognosis of  
10 triple-negative breast cancer patients. *Biomark Med* 2016;**10**:771-90.  
11  
12 doi:10.2217/bmm-2015-0064.  
13  
14  
15 45. Qiu HL, Deng SZ, Li C, *et al*. High expression of KIF14 is associated with poor  
16 prognosis in patients with epithelial ovarian cancer. *Eur Rev Med Pharmacol Sci*  
17  
18 2017;**21**:239-45.  
19  
20  
21  
22 46. Luo Y, Zhang X, Mo M, *et al*. High Ki-67 Immunohistochemical Reactivity  
23  
24 Correlates With Poor Prognosis in Bladder Carcinoma: A Comprehensive  
25  
26 Meta-Analysis with 13,053 Patients Involved. *Medicine (Baltimore)* 2016;**95**:e3337.  
27  
28 doi:10.1097/md.0000000000003337.  
29  
30  
31 47. Zhou X, Zhang G, Tian Y. p53 Status correlates with the risk of recurrence in  
32  
33 non-muscle invasive bladder cancers treated with Bacillus Calmette-Guerin: a  
34  
35 meta-analysis. *PLoS One* 2015;**10**:e0119476. doi:10.1371/journal.pone.0119476.  
36  
37  
38 48. Du J, Wang SH, Yang Q, *et al*. p53 status correlates with the risk of progression in  
39  
40 stage T1 bladder cancer: a meta-analysis. *World J Surg Oncol* 2016;**14**:137.  
41  
42 doi:10.1186/s12957-016-0890-9.  
43  
44  
45 49. Fridman JS, Lowe SW. Control of apoptosis by p53. *Oncogene* 2003;**22**:9030-40.  
46  
47 doi:10.1038/sj.onc.1207116.  
48  
49  
50 50. Muller PA, Vousden KH, Norman JC. p53 and its mutants in tumor cell migration  
51  
52 and invasion. *J Cell Biol* 2011;**192**:209-18. doi:10.1083/jcb.201009059.  
53  
54

55 **Figure File**

1  
2  
3 **Figure 1.** Flow diagram of study selection.

4  
5 **Figure 2.** Forest plots of HRs estimated for the relationship between the expression of  
6  
7 ki67 and RFS (A) or PFS (B) among patients in NMIBC treated with BCG.

8  
9 **Figure 3.** Galbraith plot analysis was used to evaluate heterogeneity and RFS (A) or  
10  
11 PFS (B).

12  
13 **Figure 4.** Funnel plots of the expression of ki67 and RFS (A) or PFS (B).

14  
15  
16  
17  
18 **Table File**

19  
20 **Table 1.** Main characteristics of all studies included in this meta-analysis.

21  
22 **Table 2.** Quality of the included studies assessed by NOS.

23  
24 **Table 3.** Subgroup results of RFS and heterogeneity test.

25  
26 **Table 4.** Subgroup results of PFS and heterogeneity test.

27  
28  
29  
30  
31 **Supplementary File**

32  
33 **File S1.** Electronic search strategy in PubMed.

34  
35 **Table S1.** PRISMA.

36  
37 **Table S2.** Meta-regression analysis of RFS and PFS.

38  
39 **Table S3.** Risk group stratification in NMIBC.

40  
41  
42 **Figure S1.** Forest plots of HRs estimated for the relationship between the expression  
43  
44 of ki67 and RFS after the aforementioned study was excluded.

45  
46 **Figure S2.** Forest plots of HRs estimated for the relationship between the expression  
47  
48 of ki67 and PFS after the aforementioned study was excluded.

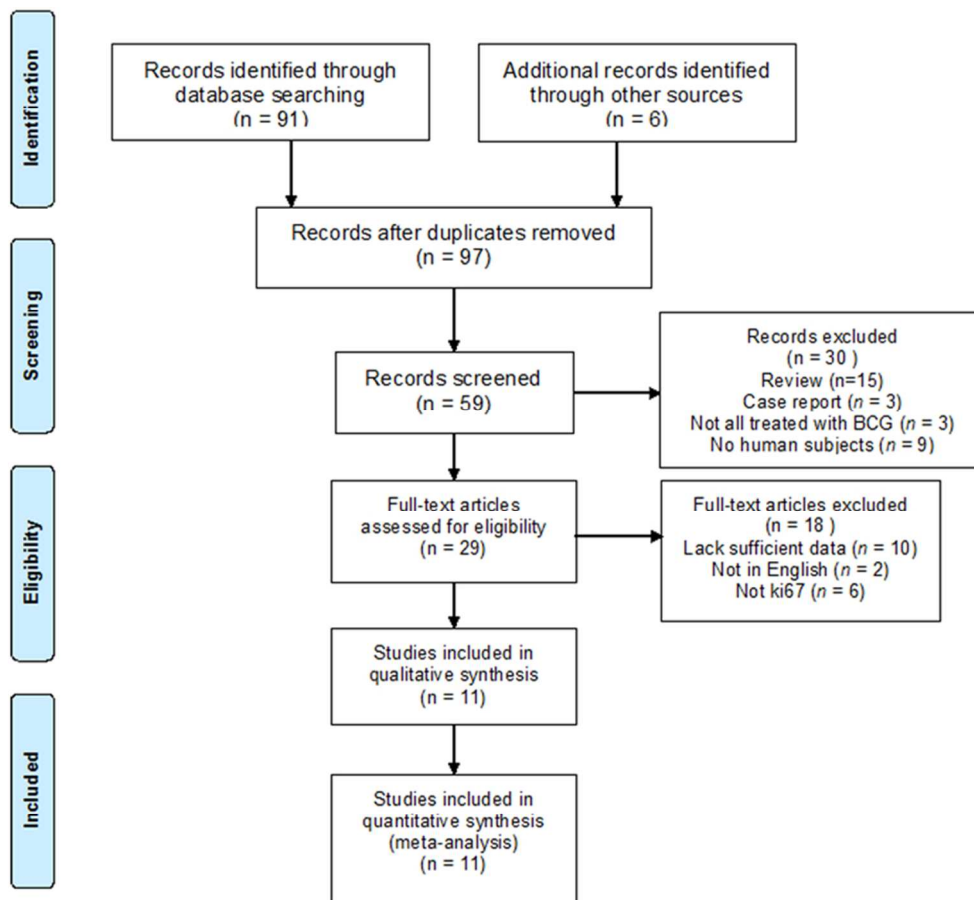

Figure 1. Flow diagram of study selection.

80x72mm (300 x 300 DPI)

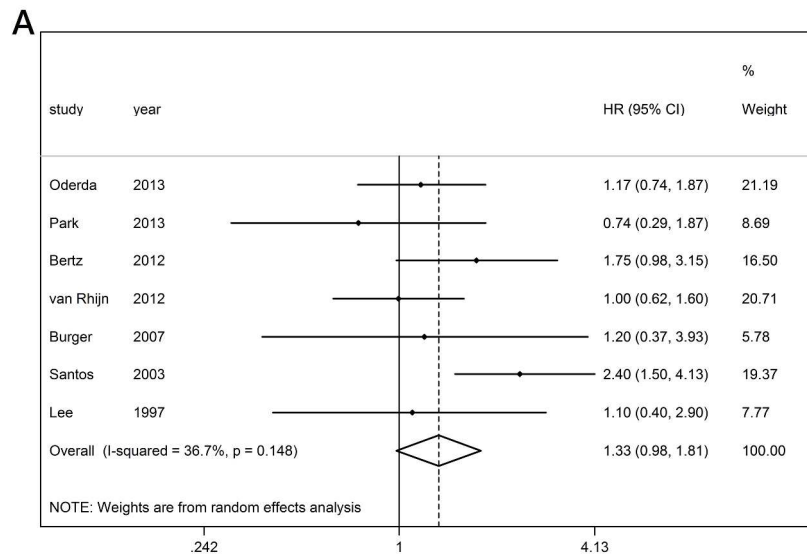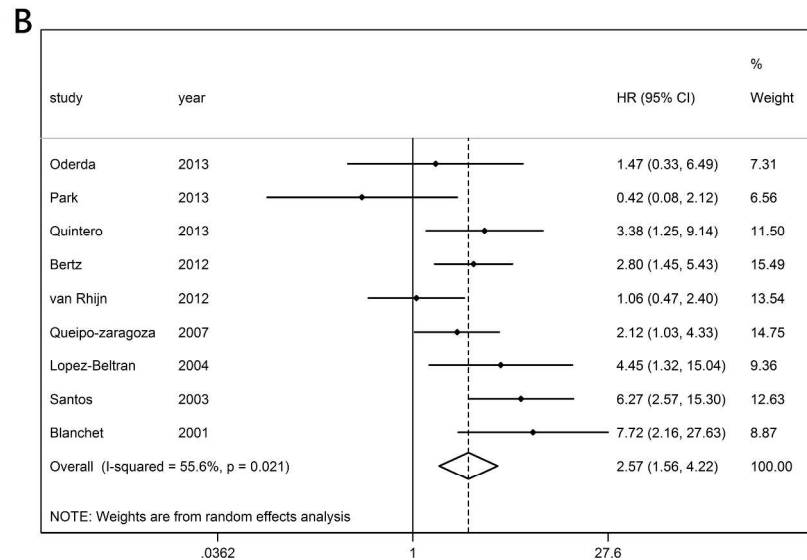

Forest plots of HRs estimated for the relationship between the expression of ki67 and RFS (A) or PFS (B) among patients in NMIBC treated with BCG.

267x381mm (300 x 300 DPI)



Galbraith plot analysis was used to evaluate heterogeneity and RFS (A) or PFS (B).

268x358mm (300 x 300 DPI)



1  
2  
3  
4  
5  
6  
7  
8  
9  
10  
11  
12  
13  
14  
15  
16  
17  
18  
19  
20  
21  
22  
23  
24  
25  
26  
27  
28  
29  
30  
31  
32  
33  
34  
35  
36  
37  
38  
39  
40  
41  
42  
43  
44  
45  
46  
47  
48  
49  
50  
51  
52  
53  
54  
55  
56  
57  
58  
59  
60

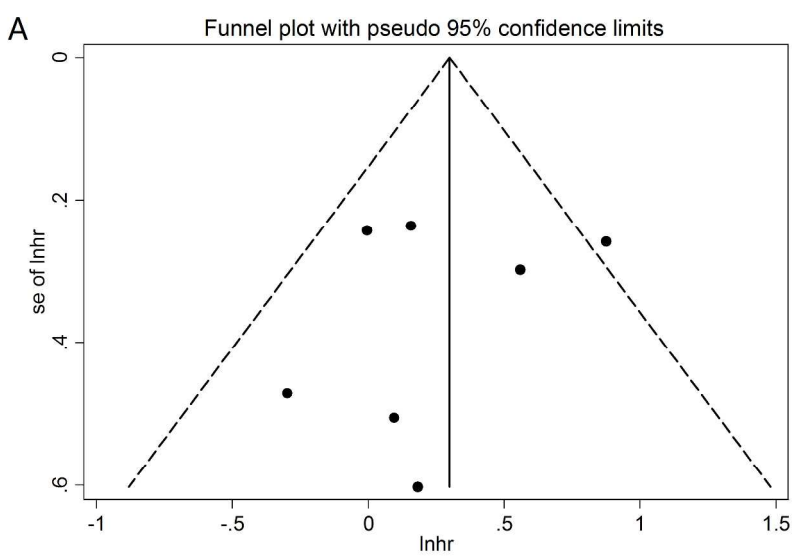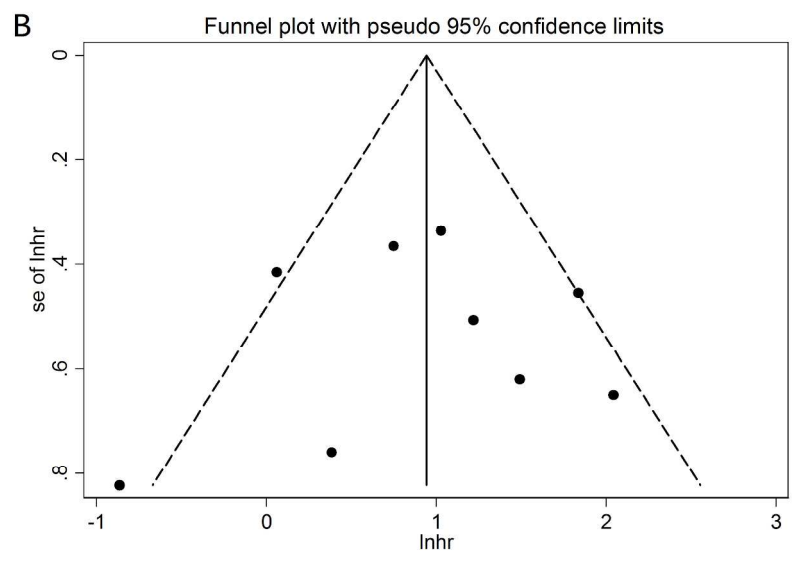

Funnel plots of the expression of ki67 and RFS (A) or PFS (B).

267x392mm (300 x 300 DPI)

# 1 2 3 4 **Prognostic Value of ki67 in Bacillus Calmette–Guérin-Treated** 5 6 **Non-muscle-Invasive Bladder Cancer: a Meta-analysis and** 7 8 **Systematic Review** 9

10  
11  
12  
13 Search strategy in PubMed.

14  
15  
16 The last quest was updated on May 24, 2017.

- 17  
18  
19  
20 #1 Search "Urinary Bladder Neoplasms" [Mesh]  
21  
22 #2 Search bladder cancer  
23  
24 #3 Search bladder carcinoma  
25  
26 #4 Search bladder tumor  
27  
28 #5 Search (#1 or #2 or #3 or #4)  
29  
30 #6 Search "BCG Vaccine" [Mesh]  
31  
32 #7 Search BCG  
33  
34 #8 Search Bacillus Calmette–Guérin  
35  
36 #9 Search (#6 or #7 or #8)  
37  
38 #10 Search "ki-67 antigen" [Mesh]  
39  
40 #11 Search ki-67  
41  
42 #12 Search ki67  
43  
44 #13 Search MBI-1  
45  
46 #14 Search (#10 or #11 or #12 or #13)  
47  
48 #15 Search (#5 and #9 and #14)

49  
50 The enrolled contents included the reference lists and relevant suggestive references  
51 while searching.  
52  
53  
54  
55  
56  
57  
58  
59  
60

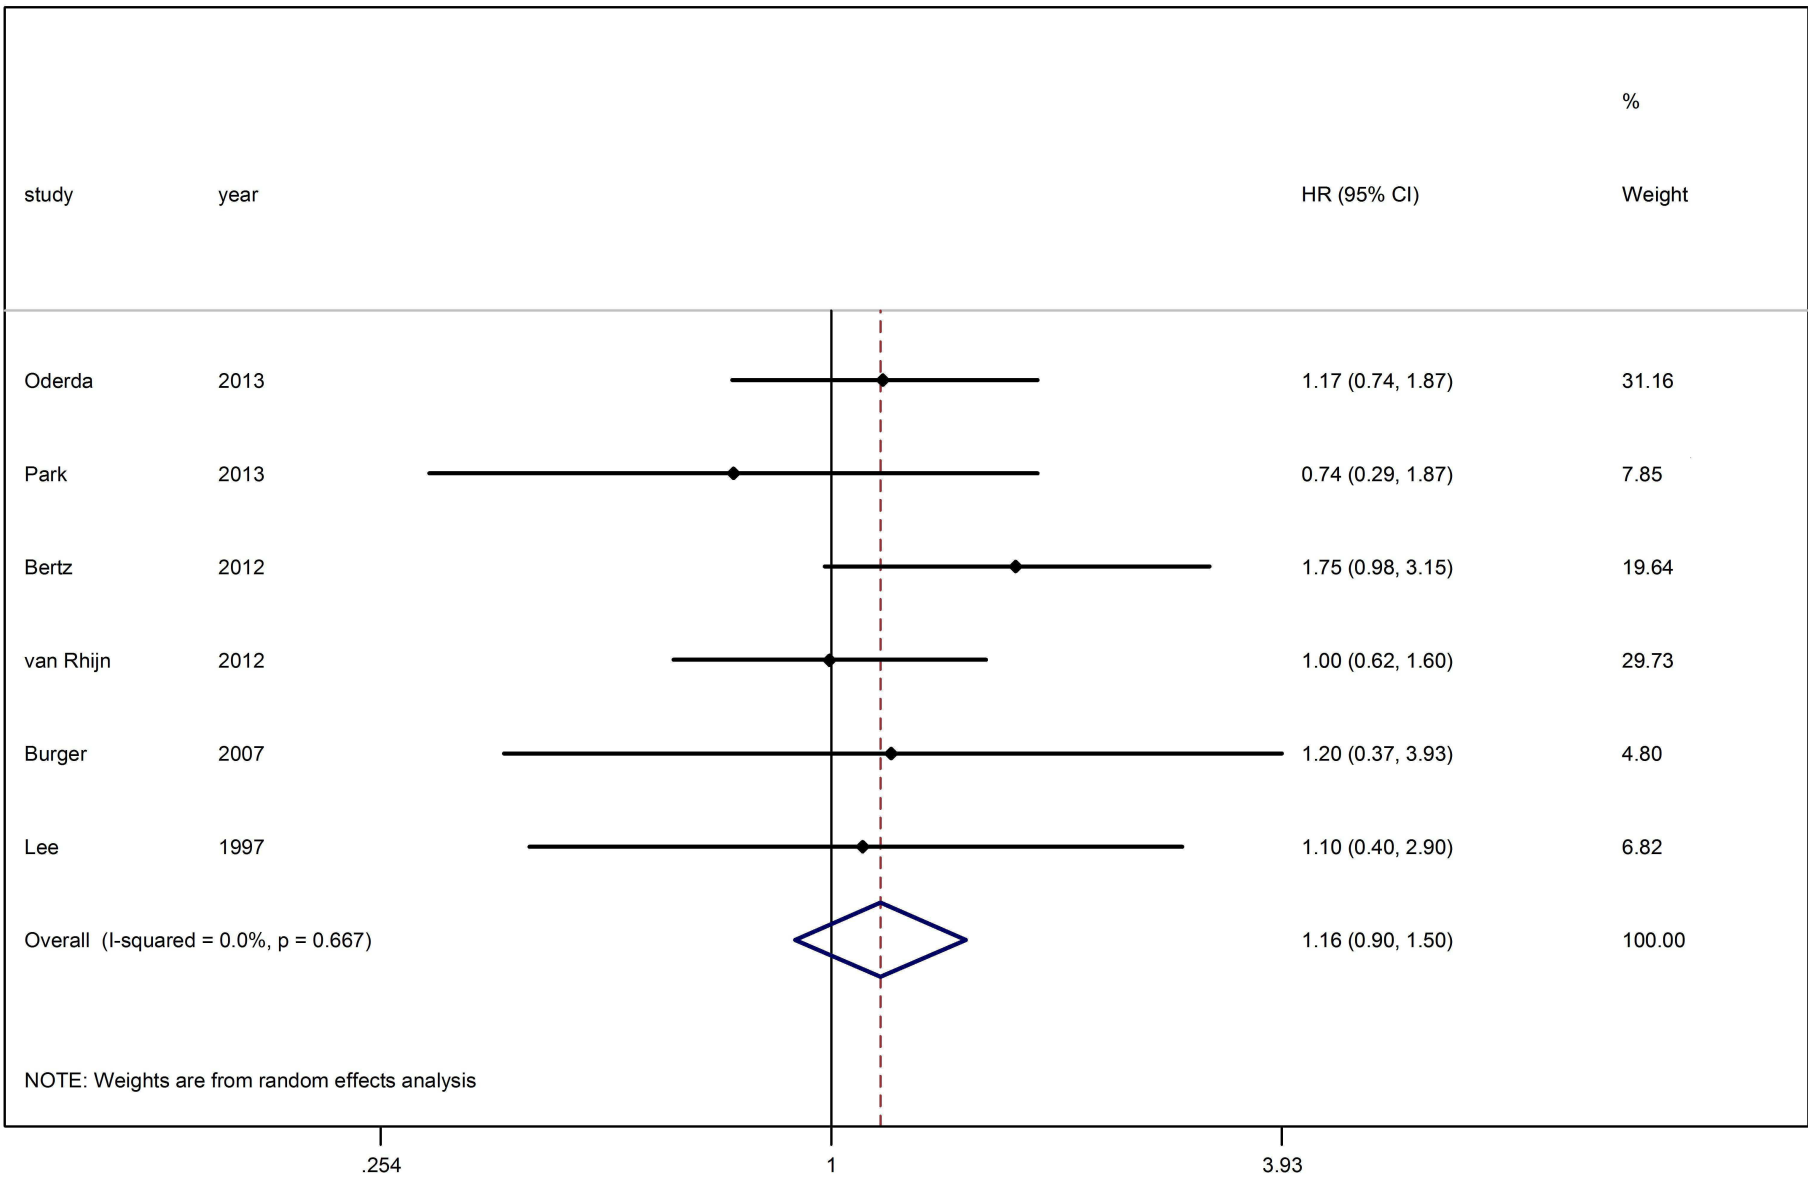

Figure S1. Forest plots of HRs estimated for the relationship between the expression of ki67 and RFS after the aforementioned study was excluded

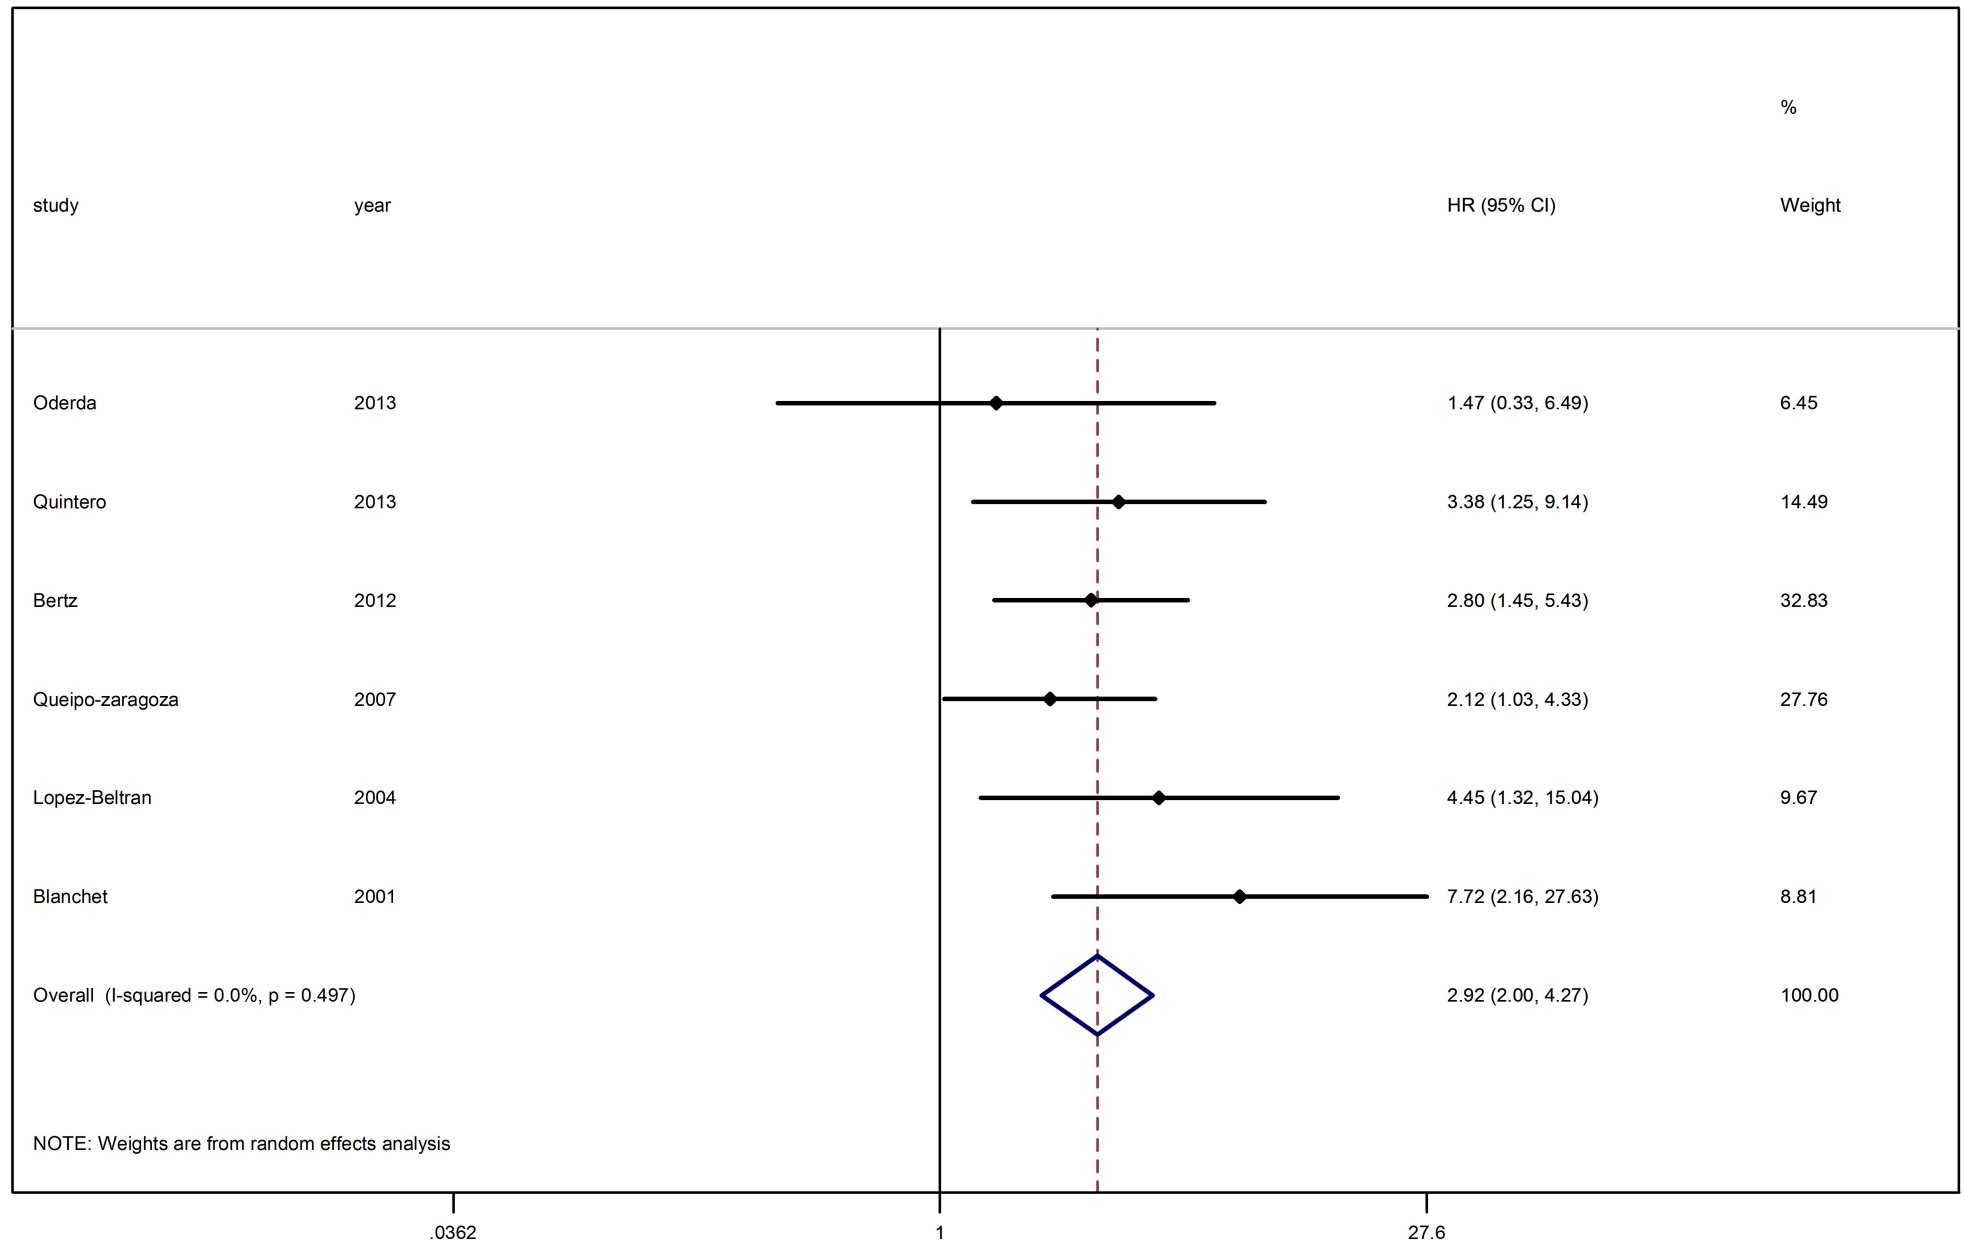

**Figure S2.** Forest plots of HRs estimated for the relationship between the expression of ki67 and PFS after the aforementioned study was excluded

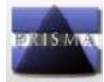

# PRISMA 2009 Checklist

| Section/topic                      | #  | Checklist item                                                                                                                                                                                                                                                                                              | Reported on page # |
|------------------------------------|----|-------------------------------------------------------------------------------------------------------------------------------------------------------------------------------------------------------------------------------------------------------------------------------------------------------------|--------------------|
| <b>TITLE</b>                       |    |                                                                                                                                                                                                                                                                                                             |                    |
| Title                              | 1  | Identify the report as a systematic review, meta-analysis, or both.                                                                                                                                                                                                                                         | 1                  |
| <b>ABSTRACT</b>                    |    |                                                                                                                                                                                                                                                                                                             |                    |
| Structured summary                 | 2  | Provide a structured summary including, as applicable: background; objectives; data sources; study eligibility criteria, participants, and interventions; study appraisal and synthesis methods; results; limitations; conclusions and implications of key findings; systematic review registration number. | 3                  |
| <b>INTRODUCTION</b>                |    |                                                                                                                                                                                                                                                                                                             |                    |
| Rationale                          | 3  | Describe the rationale for the review in the context of what is already known.                                                                                                                                                                                                                              | 4-6                |
| Objectives                         | 4  | Provide an explicit statement of questions being addressed with reference to participants, interventions, comparisons, outcomes, and study design (PICOS).                                                                                                                                                  | 4-6                |
| <b>METHODS</b>                     |    |                                                                                                                                                                                                                                                                                                             |                    |
| Protocol and registration          | 5  | Indicate if a review protocol exists, if and where it can be accessed (e.g., Web address), and, if available, provide registration information including registration number.                                                                                                                               | 7                  |
| Eligibility criteria               | 6  | Specify study characteristics (e.g., PICOS, length of follow-up) and report characteristics (e.g., years considered, language, publication status) used as criteria for eligibility, giving rationale.                                                                                                      | 7                  |
| Information sources                | 7  | Describe all information sources (e.g., databases with dates of coverage, contact with study authors to identify additional studies) in the search and date last searched.                                                                                                                                  | 7                  |
| Search                             | 8  | Present full electronic search strategy for at least one database, including any limits used, such that it could be repeated.                                                                                                                                                                               | 7                  |
| Study selection                    | 9  | State the process for selecting studies (i.e., screening, eligibility, included in systematic review, and, if applicable, included in the meta-analysis).                                                                                                                                                   | 7-8                |
| Data collection process            | 10 | Describe method of data extraction from reports (e.g., piloted forms, independently, in duplicate) and any processes for obtaining and confirming data from investigators.                                                                                                                                  | 7-8                |
| Data items                         | 11 | List and define all variables for which data were sought (e.g., PICOS, funding sources) and any assumptions and simplifications made.                                                                                                                                                                       | 8-9                |
| Risk of bias in individual studies | 12 | Describe methods used for assessing risk of bias of individual studies (including specification of whether this was done at the study or outcome level), and how this information is to be used in any data synthesis.                                                                                      | 9                  |
| Summary measures                   | 13 | State the principal summary measures (e.g., risk ratio, difference in means).                                                                                                                                                                                                                               | 8-9                |
| Synthesis of results               | 14 | Describe the methods of handling data and combining results of studies, if done, including measures of consistency (e.g., $I^2$ ) for each meta-analysis.                                                                                                                                                   | 8-9                |



# PRISMA 2009 Checklist

| Section/topic                 | #  | Checklist item                                                                                                                                                                                           | Reported on page # |
|-------------------------------|----|----------------------------------------------------------------------------------------------------------------------------------------------------------------------------------------------------------|--------------------|
| Risk of bias across studies   | 15 | Specify any assessment of risk of bias that may affect the cumulative evidence (e.g., publication bias, selective reporting within studies).                                                             | 9                  |
| Additional analyses           | 16 | Describe methods of additional analyses (e.g., sensitivity or subgroup analyses, meta-regression), if done, indicating which were pre-specified.                                                         | 9                  |
| <b>RESULTS</b>                |    |                                                                                                                                                                                                          |                    |
| Study selection               | 17 | Give numbers of studies screened, assessed for eligibility, and included in the review, with reasons for exclusions at each stage, ideally with a flow diagram.                                          | 9-10               |
| Study characteristics         | 18 | For each study, present characteristics for which data were extracted (e.g., study size, PICOS, follow-up period) and provide the citations.                                                             | 10-12              |
| Risk of bias within studies   | 19 | Present data on risk of bias of each study and, if available, any outcome level assessment (see item 12).                                                                                                | 17                 |
| Results of individual studies | 20 | For all outcomes considered (benefits or harms), present, for each study: (a) simple summary data for each intervention group (b) effect estimates and confidence intervals, ideally with a forest plot. | 13-16              |
| Synthesis of results          | 21 | Present results of each meta-analysis done, including confidence intervals and measures of consistency.                                                                                                  | 9-17               |
| Risk of bias across studies   | 22 | Present results of any assessment of risk of bias across studies (see Item 15).                                                                                                                          | 17                 |
| Additional analysis           | 23 | Give results of additional analyses, if done (e.g., sensitivity or subgroup analyses, meta-regression [see Item 16]).                                                                                    | 17                 |
| <b>DISCUSSION</b>             |    |                                                                                                                                                                                                          |                    |
| Summary of evidence           | 24 | Summarize the main findings including the strength of evidence for each main outcome; consider their relevance to key groups (e.g., healthcare providers, users, and policy makers).                     | 17-22              |
| Limitations                   | 25 | Discuss limitations at study and outcome level (e.g., risk of bias), and at review-level (e.g., incomplete retrieval of identified research, reporting bias).                                            | 22                 |
| Conclusions                   | 26 | Provide a general interpretation of the results in the context of other evidence, and implications for future research.                                                                                  | 22                 |
| <b>FUNDING</b>                |    |                                                                                                                                                                                                          |                    |
| Funding                       | 27 | Describe sources of funding for the systematic review and other support (e.g., supply of data); role of funders for the systematic review.                                                               | 23                 |

From: Moher D, Liberati A, Tetzlaff J, Altman DG, The PRISMA Group (2009). Preferred Reporting Items for Systematic Reviews and Meta-Analyses: The PRISMA Statement. PLoS Med 6(6): e1000097. doi:10.1371/journal.pmed1000097

For more information, visit: [www.prisma-statement.org](http://www.prisma-statement.org).

Table S2. Meta-regression analysis of RFS and PFS

## PFS

| Heterogeneity factor | Coefficient | SE     | <i>t</i> | <i>P</i> |
|----------------------|-------------|--------|----------|----------|
| Years                | -0.0343     | 0.0283 | -1.21    | 0.280    |
| Country              |             |        |          |          |
| 1                    | -0.3899     | 0.3716 | -1.05    | 0.404    |
| 2                    | -0.7185     | 0.3503 | -2.05    | 0.177    |
| 3                    | -0.9900     | 0.4307 | -2.30    | 0.148    |
| 4                    | -0.8805     | 0.3541 | -2.49    | 0.131    |
| Numbers of patients  | 0.0022      | 0.0020 | 1.16     | 0.299    |
| Stage                | None        |        |          |          |
| Cutoff               | -0.0098     | 0.0407 | -0.24    | 0.819    |
| Age                  | 0.0021      | 0.0395 | 0.05     | 0.959    |
| Follow-up            | -0.0062     | 0.0065 | -0.96    | 0.379    |

## PFS

| Heterogeneity factor | Coefficient | SE     | <i>t</i> | <i>P</i> |
|----------------------|-------------|--------|----------|----------|
| Years                | -0.1195     | 0.0461 | -2.59    | 0.036    |
| Country              |             |        |          |          |

|    |           |         |        |        |       |
|----|-----------|---------|--------|--------|-------|
| 1  |           |         |        |        |       |
| 2  |           |         |        |        |       |
| 3  |           |         |        |        |       |
| 4  | 1         | 0.2080  | 0.7936 | 0.26   | 0.818 |
| 5  |           |         |        |        |       |
| 6  | 2         | -0.8062 | 0.5662 | -1.42  | 0.290 |
| 7  |           |         |        |        |       |
| 8  |           |         |        |        |       |
| 9  | 3         | -1.4505 | 0.8858 | -1.64  | 0.243 |
| 10 |           |         |        |        |       |
| 11 | 4         | -2.7009 | 0.9407 | -2.87  | 0.103 |
| 12 |           |         |        |        |       |
| 13 |           |         |        |        |       |
| 14 | 5         | -1.7766 | 0.6167 | -2.88  | 0.102 |
| 15 |           |         |        |        |       |
| 16 |           |         |        |        |       |
| 17 | 6         | -0.8158 | 0.5281 | -1.54  | 0.262 |
| 18 |           |         |        |        |       |
| 19 | Numbers   | of      | 0.0006 | 0.0036 | 0.16  |
| 20 |           |         |        |        |       |
| 21 | patients  |         |        |        |       |
| 22 |           |         |        |        |       |
| 23 |           |         |        |        |       |
| 24 | Stage     |         |        |        |       |
| 25 |           |         |        |        |       |
| 26 |           |         |        |        |       |
| 27 | 1         | -1.4505 | 1.5909 | -0.91  | 0.458 |
| 28 |           |         |        |        |       |
| 29 |           |         |        |        |       |
| 30 | 2         | -0.8062 | 1.4108 | -0.57  | 0.625 |
| 31 |           |         |        |        |       |
| 32 |           |         |        |        |       |
| 33 | 3         | 0.2080  | 1.5332 | 0.14   | 0.904 |
| 34 |           |         |        |        |       |
| 35 | 4         | -1.7766 | 1.4353 | -1.24  | 0.341 |
| 36 |           |         |        |        |       |
| 37 |           |         |        |        |       |
| 38 | 5         | -1.2560 | 1.2069 | -1.04  | 0.407 |
| 39 |           |         |        |        |       |
| 40 |           |         |        |        |       |
| 41 | 6         | -0.6170 | 1.4689 | -0.42  | 0.715 |
| 42 |           |         |        |        |       |
| 43 | Cutoff    | -0.0177 | 0.0309 | -0.57  | 0.585 |
| 44 |           |         |        |        |       |
| 45 | Age       | -0.0672 | 0.0757 | -0.89  | 0.404 |
| 46 |           |         |        |        |       |
| 47 |           |         |        |        |       |
| 48 | Follow-up | -0.0118 | 0.0159 | -0.74  | 0.483 |
| 49 |           |         |        |        |       |
| 50 |           |         |        |        |       |
| 51 |           |         |        |        |       |
| 52 |           |         |        |        |       |
| 53 |           |         |        |        |       |
| 54 |           |         |        |        |       |
| 55 |           |         |        |        |       |
| 56 |           |         |        |        |       |
| 57 |           |         |        |        |       |
| 58 |           |         |        |        |       |
| 59 |           |         |        |        |       |
| 60 |           |         |        |        |       |



Table S3. Risk group stratification in NMIBC

|                                 |                                                                                                                                                                                 |
|---------------------------------|---------------------------------------------------------------------------------------------------------------------------------------------------------------------------------|
| <b>Low-risk tumors</b>          | Primary, solitary, Ta, LG/G1, <3 cm, no CIS                                                                                                                                     |
| <b>Intermediate-risk tumors</b> | All tumors not defined in the two adjacent categories (between the category of low and high risk)                                                                               |
| <b>High-risk tumors</b>         | Any of the following:<br><br>T1 tumor<br><br>HG/G3 tumor<br><br>CIS<br><br>Multiple, recurrent, and large (>3 cm) Ta G1G2 tumors (all conditions must be present at this point) |

NMIBC, non-muscle-invasive bladder cancer; CIS, carcinoma in situ; HG, high grade; LG, low grade.

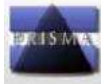

# PRISMA 2009 Checklist

1  
2  
3  
4  
5  
6  
7  
8  
9  
10  
11  
12  
13  
14  
15  
16  
17  
18  
19  
20  
21  
22  
23  
24  
25  
26  
27  
28  
29  
30  
31  
32  
33  
34  
35  
36  
37  
38  
39  
40  
41  
42  
43  
44  
45  
46  
47

| Section/topic                      | #  | Checklist item                                                                                                                                                                                                                                                                                              | Reported on page # |
|------------------------------------|----|-------------------------------------------------------------------------------------------------------------------------------------------------------------------------------------------------------------------------------------------------------------------------------------------------------------|--------------------|
| <b>TITLE</b>                       |    |                                                                                                                                                                                                                                                                                                             |                    |
| Title                              | 1  | Identify the report as a systematic review, meta-analysis, or both.                                                                                                                                                                                                                                         | 1                  |
| <b>ABSTRACT</b>                    |    |                                                                                                                                                                                                                                                                                                             |                    |
| Structured summary                 | 2  | Provide a structured summary including, as applicable: background; objectives; data sources; study eligibility criteria, participants, and interventions; study appraisal and synthesis methods; results; limitations; conclusions and implications of key findings; systematic review registration number. | 3                  |
| <b>INTRODUCTION</b>                |    |                                                                                                                                                                                                                                                                                                             |                    |
| Rationale                          | 3  | Describe the rationale for the review in the context of what is already known.                                                                                                                                                                                                                              | 4-6                |
| Objectives                         | 4  | Provide an explicit statement of questions being addressed with reference to participants, interventions, comparisons, outcomes, and study design (PICOS).                                                                                                                                                  | 4-6                |
| <b>METHODS</b>                     |    |                                                                                                                                                                                                                                                                                                             |                    |
| Protocol and registration          | 5  | Indicate if a review protocol exists, if and where it can be accessed (e.g., Web address), and, if available, provide registration information including registration number.                                                                                                                               | 7                  |
| Eligibility criteria               | 6  | Specify study characteristics (e.g., PICOS, length of follow-up) and report characteristics (e.g., years considered, language, publication status) used as criteria for eligibility, giving rationale.                                                                                                      | 7                  |
| Information sources                | 7  | Describe all information sources (e.g., databases with dates of coverage, contact with study authors to identify additional studies) in the search and date last searched.                                                                                                                                  | 7                  |
| Search                             | 8  | Present full electronic search strategy for at least one database, including any limits used, such that it could be repeated.                                                                                                                                                                               | 7                  |
| Study selection                    | 9  | State the process for selecting studies (i.e., screening, eligibility, included in systematic review, and, if applicable, included in the meta-analysis).                                                                                                                                                   | 7-8                |
| Data collection process            | 10 | Describe method of data extraction from reports (e.g., piloted forms, independently, in duplicate) and any processes for obtaining and confirming data from investigators.                                                                                                                                  | 7-8                |
| Data items                         | 11 | List and define all variables for which data were sought (e.g., PICOS, funding sources) and any assumptions and simplifications made.                                                                                                                                                                       | 8-9                |
| Risk of bias in individual studies | 12 | Describe methods used for assessing risk of bias of individual studies (including specification of whether this was done at the study or outcome level), and how this information is to be used in any data synthesis.                                                                                      | 9                  |
| Summary measures                   | 13 | State the principal summary measures (e.g., risk ratio, difference in means).                                                                                                                                                                                                                               | 8-9                |
| Synthesis of results               | 14 | Describe the methods of handling data and combining results of studies, if done, including measures of consistency (e.g., $I^2$ ) for each meta-analysis.                                                                                                                                                   | 8-9                |

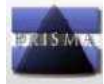

# PRISMA 2009 Checklist

| Section/topic                 | #  | Checklist item                                                                                                                                                                                           | Reported on page # |
|-------------------------------|----|----------------------------------------------------------------------------------------------------------------------------------------------------------------------------------------------------------|--------------------|
| Risk of bias across studies   | 15 | Specify any assessment of risk of bias that may affect the cumulative evidence (e.g., publication bias, selective reporting within studies).                                                             | 9                  |
| Additional analyses           | 16 | Describe methods of additional analyses (e.g., sensitivity or subgroup analyses, meta-regression), if done, indicating which were pre-specified.                                                         | 9                  |
| <b>RESULTS</b>                |    |                                                                                                                                                                                                          |                    |
| Study selection               | 17 | Give numbers of studies screened, assessed for eligibility, and included in the review, with reasons for exclusions at each stage, ideally with a flow diagram.                                          | 9-10               |
| Study characteristics         | 18 | For each study, present characteristics for which data were extracted (e.g., study size, PICOS, follow-up period) and provide the citations.                                                             | 10-12              |
| Risk of bias within studies   | 19 | Present data on risk of bias of each study and, if available, any outcome level assessment (see item 12).                                                                                                | 17                 |
| Results of individual studies | 20 | For all outcomes considered (benefits or harms), present, for each study: (a) simple summary data for each intervention group (b) effect estimates and confidence intervals, ideally with a forest plot. | 13-16              |
| Synthesis of results          | 21 | Present results of each meta-analysis done, including confidence intervals and measures of consistency.                                                                                                  | 9-17               |
| Risk of bias across studies   | 22 | Present results of any assessment of risk of bias across studies (see Item 15).                                                                                                                          | 17                 |
| Additional analysis           | 23 | Give results of additional analyses, if done (e.g., sensitivity or subgroup analyses, meta-regression [see Item 16]).                                                                                    | 17                 |
| <b>DISCUSSION</b>             |    |                                                                                                                                                                                                          |                    |
| Summary of evidence           | 24 | Summarize the main findings including the strength of evidence for each main outcome; consider their relevance to key groups (e.g., healthcare providers, users, and policy makers).                     | 17-22              |
| Limitations                   | 25 | Discuss limitations at study and outcome level (e.g., risk of bias), and at review-level (e.g., incomplete retrieval of identified research, reporting bias).                                            | 22                 |
| Conclusions                   | 26 | Provide a general interpretation of the results in the context of other evidence, and implications for future research.                                                                                  | 22                 |
| <b>FUNDING</b>                |    |                                                                                                                                                                                                          |                    |
| Funding                       | 27 | Describe sources of funding for the systematic review and other support (e.g., supply of data); role of funders for the systematic review.                                                               | 23                 |

From: Moher D, Liberati A, Tetzlaff J, Altman DG, The PRISMA Group (2009). Preferred Reporting Items for Systematic Reviews and Meta-Analyses: The PRISMA Statement. PLoS Med 6(6): e1000097. doi:10.1371/journal.pmed1000097

For more information, visit: [www.prisma-statement.org](http://www.prisma-statement.org).
