# Supplementary material for: Prognostic value of ki67 in BCG-treated non-muscle invasive bladder cancer: a meta-analysis and systematic review
Source: PubMed Central journal article supplement (PMC5905754; doi:10.1136/bmjopen-2017-019635), 2018-04-17
Supplement: bmjopen-2017-019635supp001.pdf [file bmjopen-2017-019635supp001.pdf]

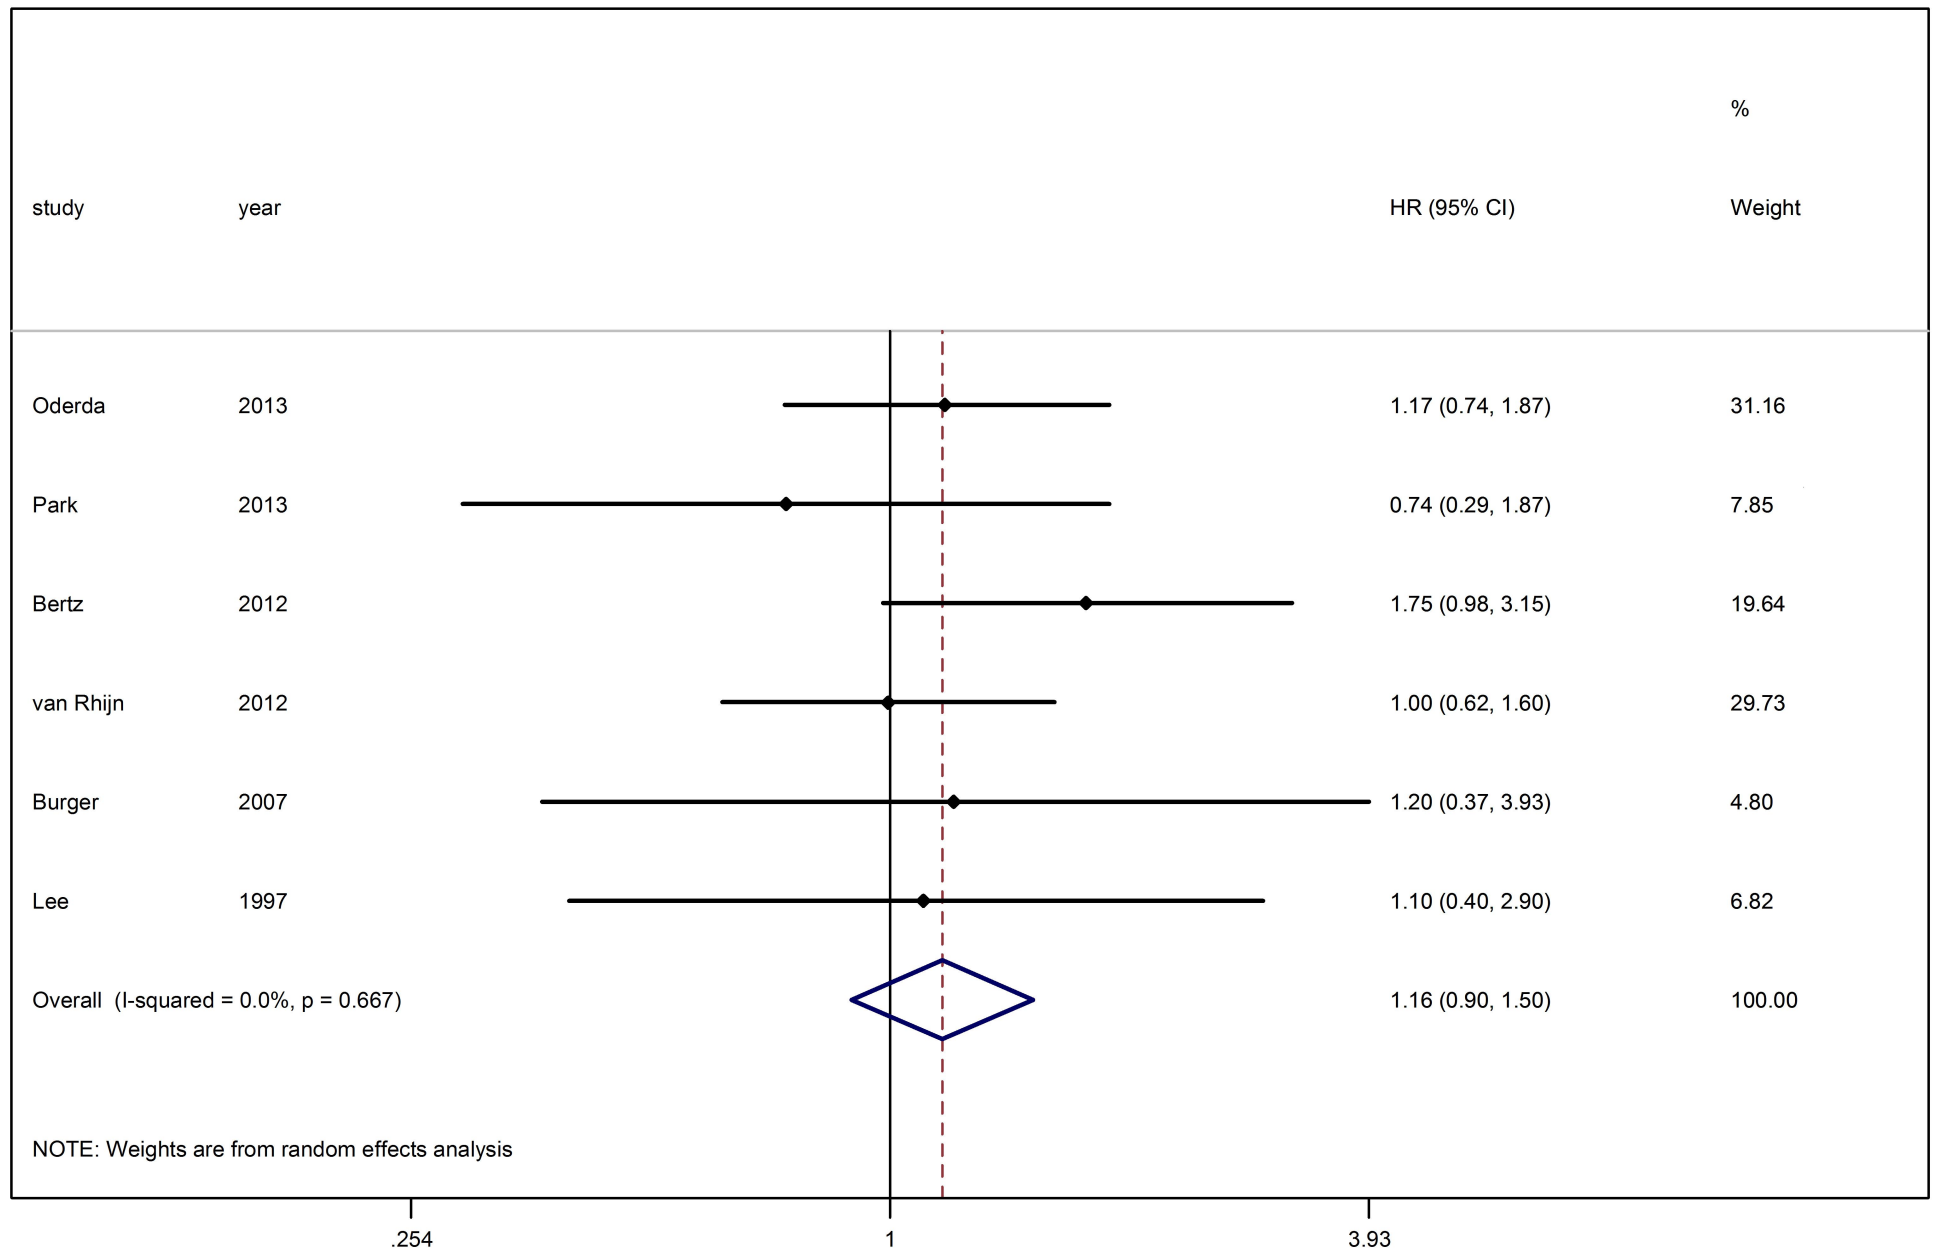

**Figure S1.** Forest plots of HRs estimated for the relationship between the expression of ki67 and RFS after the aforementioned study was excluded
