# Supplementary material for: Prognostic value of ki67 in BCG-treated non-muscle invasive bladder cancer: a meta-analysis and systematic review
Source: PubMed Central journal article supplement (PMC5905754; doi:10.1136/bmjopen-2017-019635), 2018-04-17
Supplement: bmjopen-2017-019635supp004.pdf [file bmjopen-2017-019635supp004.pdf]

Table S2. Meta-regression analysis of RFS and PFS

PFS

| Heterogeneity factor | Coefficient | SE     | <i>t</i> | <i>P</i> |
|----------------------|-------------|--------|----------|----------|
| Years                | -0.0343     | 0.0283 | -1.21    | 0.280    |
| Country              |             |        |          |          |
| 1                    | -0.3899     | 0.3716 | -1.05    | 0.404    |
| 2                    | -0.7185     | 0.3503 | -2.05    | 0.177    |
| 3                    | -0.9900     | 0.4307 | -2.30    | 0.148    |
| 4                    | -0.8805     | 0.3541 | -2.49    | 0.131    |
| Numbers of patients  | 0.0022      | 0.0020 | 1.16     | 0.299    |
| Stage                | None        |        |          |          |
| Cutoff               | -0.0098     | 0.0407 | -0.24    | 0.819    |
| Age                  | 0.0021      | 0.0395 | 0.05     | 0.959    |
| Follow-up            | -0.0062     | 0.0065 | -0.96    | 0.379    |

PFS

| Heterogeneity factor | Coefficient | SE     | <i>t</i> | <i>P</i> |
|----------------------|-------------|--------|----------|----------|
| Years                | -0.1195     | 0.0461 | -2.59    | 0.036    |
| Country              |             |        |          |          |

|                     |         |        |       |       |
|---------------------|---------|--------|-------|-------|
| 1                   | 0.2080  | 0.7936 | 0.26  | 0.818 |
| 2                   | -0.8062 | 0.5662 | -1.42 | 0.290 |
| 3                   | -1.4505 | 0.8858 | -1.64 | 0.243 |
| 4                   | -2.7009 | 0.9407 | -2.87 | 0.103 |
| 5                   | -1.7766 | 0.6167 | -2.88 | 0.102 |
| 6                   | -0.8158 | 0.5281 | -1.54 | 0.262 |
| Numbers of patients | 0.0006  | 0.0036 | 0.16  | 0.877 |
| Stage               |         |        |       |       |
| 1                   | -1.4505 | 1.5909 | -0.91 | 0.458 |
| 2                   | -0.8062 | 1.4108 | -0.57 | 0.625 |
| 3                   | 0.2080  | 1.5332 | 0.14  | 0.904 |
| 4                   | -1.7766 | 1.4353 | -1.24 | 0.341 |
| 5                   | -1.2560 | 1.2069 | -1.04 | 0.407 |
| 6                   | -0.6170 | 1.4689 | -0.42 | 0.715 |
| Cutoff              | -0.0177 | 0.0309 | -0.57 | 0.585 |
| Age                 | -0.0672 | 0.0757 | -0.89 | 0.404 |
| Follow-up           | -0.0118 | 0.0159 | -0.74 | 0.483 |

---
