# Supplementary material for: Prognostic value of ki67 in BCG-treated non-muscle invasive bladder cancer: a meta-analysis and systematic review
Source: PubMed Central journal article supplement (PMC5905754; doi:10.1136/bmjopen-2017-019635), 2018-04-17
Supplement: bmjopen-2017-019635supp005.pdf [file bmjopen-2017-019635supp005.pdf]

Table S3. Risk group stratification in NMIBC

|                                 |                                                                                                                                                                                 |
|---------------------------------|---------------------------------------------------------------------------------------------------------------------------------------------------------------------------------|
| <b>Low-risk tumors</b>          | Primary, solitary, Ta, LG/G1, <3 cm, no CIS                                                                                                                                     |
| <b>Intermediate-risk tumors</b> | All tumors not defined in the two adjacent categories (between the category of low and high risk)                                                                               |
| <b>High-risk tumors</b>         | Any of the following:<br><br>T1 tumor<br><br>HG/G3 tumor<br><br>CIS<br><br>Multiple, recurrent, and large (>3 cm) Ta G1G2 tumors (all conditions must be present at this point) |

NMIBC, non-muscle-invasive bladder cancer; CIS, carcinoma in situ; HG, high grade; LG, low grade.
