# Supplementary material for: Prognostic value of ki67 in BCG-treated non-muscle invasive bladder cancer: a meta-analysis and systematic review
Source: PubMed Central journal article supplement (PMC5905754; doi:10.1136/bmjopen-2017-019635), 2018-04-17
Supplement: bmjopen-2017-019635supp006.pdf [file bmjopen-2017-019635supp006.pdf]

# **Prognostic Value of ki67 in Bacillus Calmette–Guérin-Treated Non-muscle-Invasive Bladder Cancer: a Meta-analysis and Systematic Review**

Search strategy in PubMed.

The last quest was updated on May 24, 2017.

- #1 Search "Urinary Bladder Neoplasms" [Mesh]
- #2 Search bladder cancer
- #3 Search bladder carcinoma
- #4 Search bladder tumor
- #5 Search (#1 or #2 or #3 or #4)
- #6 Search "BCG Vaccine" [Mesh]
- #7 Search BCG
- #8 Search Bacillus Calmette–Guérin
- #9 Search (#6 or #7 or #8)
- #10 Search "ki-67 antigen" [Mesh]
- #11 Search ki-67
- #12 Search ki67
- #13 Search MBI-1
- #14 Search (#10 or #11 or #12 or #13)
- #15 Search (#5 and #9 and #14)

The enrolled contents included the reference lists and relevant suggestive references while searching.
